# Supplementary material for: Diastereoselective Synthesis of Dispiro[Imidazothiazolotriazine-Pyrrolidin-Oxindoles] and Their Isomerization Pathways in Basic Medium
Source: MDPI journal article supplement (doi:10.3390/ijms242216359), 2023-11-15

# Supplementary Information

## Diastereoselective Synthesis of Dispiro[Imidazothiazolotriazine-Pyrrolidin- Oxindoles] and Their Isomerization Pathways in Basic Medium

Alexei N. Izmet'sev<sup>1,2</sup>, Dmitry B. Vinogradov<sup>1</sup>, Angelina N. Kravchenko<sup>1</sup>, Natalya G. Kolotyrkina<sup>1</sup> and Galina A. Gazieva<sup>1,\*</sup>

<sup>1</sup> N. D. Zelinsky Institute of Organic Chemistry, Russian Academy of Sciences, 47 Leninsky Prospekt, Moscow 119991, Russia; nebeli@mail.ru (A.N.I.); vinogradovdima14@ioc.ac.ru (D.B.V.); kani@ioc.ac.ru (A.N.K.); nkolotyr@gmail.com (N.G.K.)

<sup>2</sup> Department of General and Inorganic Chemistry, National University of Science and Technology "MISIS",

4 Leninsky Prospekt, Moscow 119049, Russia

\* Correspondence: gaz@ioc.ac.ru

### Table of Contents

|                                                                                                                                |     |
|--------------------------------------------------------------------------------------------------------------------------------|-----|
| 1. X-ray crystallographic data and refinement details for <b>4f</b> , <b>5b</b> , <b>6a</b> and <b>11e</b> .....               | S2  |
| 2. References .....                                                                                                            | S3  |
| 3. Spectra <sup>1</sup> H and <sup>13</sup> C NMR of compounds <b>4a-m</b> .....                                               | S4  |
| 4. Spectra <sup>1</sup> H and <sup>13</sup> C NMR of compounds <b>5a-j</b> .....                                               | S28 |
| 5. Spectra <sup>1</sup> H and <sup>13</sup> C NMR of compounds <b>6a,b,e-g,i,j</b> .....                                       | S48 |
| 6. Spectra <sup>1</sup> H and <sup>13</sup> C NMR of compounds <b>11a-f</b> .....                                              | S62 |
| 7. Spectra { <sup>1</sup> H- <sup>1</sup> H} NOESY and { <sup>1</sup> H- <sup>13</sup> C} HMBC NMR of compound <b>6a</b> ..... | S74 |
| 8. Chromatograms of the mixture of diastereomers <b>4l</b> and <b>4m</b> .....                                                 | S76 |

## X-ray crystallographic data and refinement details for **4f**, **5b**, **6a** and **11e**

Single crystals of **4f**, **5b**, **6a** and **7e** were grown from MeCN.

Data collection for samples **4f** and **6a** X-ray were collected at 100K on a four-circle Rigaku Synergy S diffractometer equipped with a HyPix600HE area-detector (kappa geometry, shutterless  $\omega$ -scan technique), using graphite monochromatized Cu K $_{\alpha}$ -radiation. The intensity data were integrated and corrected for absorption and decay by the CrysAlisPro program.<sup>1</sup> The structure was solved by direct methods using SHELXT<sup>2</sup> and refined on  $F^2$  using SHELXL-2018<sup>3</sup> in the OLEX2 program.<sup>4</sup> All non-hydrogen atoms were refined with individual anisotropic displacement parameters. Locations of amino hydrogen atoms (9-NH and 1''-NH) were found from the electron density-difference map; these hydrogen atoms were refined with individual isotropic displacement parameters. All other hydrogen atoms were placed in ideal calculated positions and refined as riding atoms with relative isotropic displacement parameters. The SHELXTL program suite<sup>5</sup> was used for molecular graphics. The crystal of compound **6a** contains disordered solvent molecules in the voids with volume of 182 Å<sup>3</sup> per unit cell. Presumably, it includes an acetonitrile molecule with approximately 85% occupancy and probably water molecules with small partial occupancies, located at the same place, which does not allow correct modeling of the lattice solvent molecules in the crystal. A solvent mask was used by OLEX2<sup>4</sup> to remove solvent molecules (48 electrons were found).

Data collection for samples **5b** and **11e** X-ray were collected at 100K on a Bruker Quest D8 diffractometer equipped with a Photon-III area-detector (graphite monochromator, shutterless  $\phi$ - and  $\omega$ -scan technique), using Mo K $_{\alpha}$ -radiation. The intensity data were integrated by the SAINT program<sup>5</sup> and were corrected for absorption and decay using SADABS.<sup>6</sup> The structure was solved by direct methods using SHELXT<sup>2</sup> and refined on  $F^2$  using SHELXL-2018.<sup>3</sup> All non-hydrogen atoms were refined with individual anisotropic displacement parameters. Locations of amino hydrogen atoms (4-NH, 9-NH and 1''-NH) were found from the electron density-difference map; these hydrogen atoms were refined with individual isotropic displacement parameters. All other hydrogen atoms were placed in ideal calculated positions and refined as riding atoms with relative isotropic displacement parameters. The SHELXTL program suite<sup>5</sup> was used for molecular graphics.

Deposition Numbers 2297041–2297044 contain the supplementary crystallographic data for this paper. These data are provided free of charge by the joint Cambridge Crystallographic Data Centre and Fachinformationszentrum Karlsruhe Access Structures service [www.ccdc.cam.ac.uk/structures](http://www.ccdc.cam.ac.uk/structures).

## References

1. CrysAlisPro. Version 1.171.41.106a. *Rigaku Oxford Diffraction*, **2021**.
2. Sheldrick G. M. SHELXT — Integrated space-group and crystal-structure determination *Acta Cryst.* **2015**, A71, 3–8.  
<http://doi.org/10.1107/S2053273314026370>
3. Sheldrick G. M. Crystal structure refinement with SHELXL *Acta Cryst.* **2015**, C71, 3–8.  
<http://doi.org/10.1107/S2053229614024218>
4. Dolomanov O. V., Bourhis L. J., Gildea R. J., Howard J. A. K., Puschmann H. OLEX2: a complete structure solution, refinement and analysis program *J. Appl. Cryst.* **2009**, 42, 229–341.  
<http://doi.org/10.1107/S0021889808042726>
5. Bruker. APEX-III. *Bruker AXS Inc.*, Madison, Wisconsin, USA, **2019**.
6. Krause L., Herbst-Irmer R., Sheldrick G. M., Stalke D. Comparison of silver and molybdenum microfocus X-ray sources for single-crystal structure determination *J. Appl. Cryst.* **2015**, 48, 3–10.  
<http://doi.org/10.1107/S1600576714022985>

/KANI IA1593.1

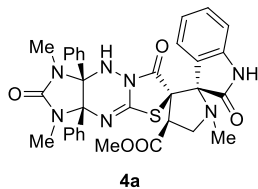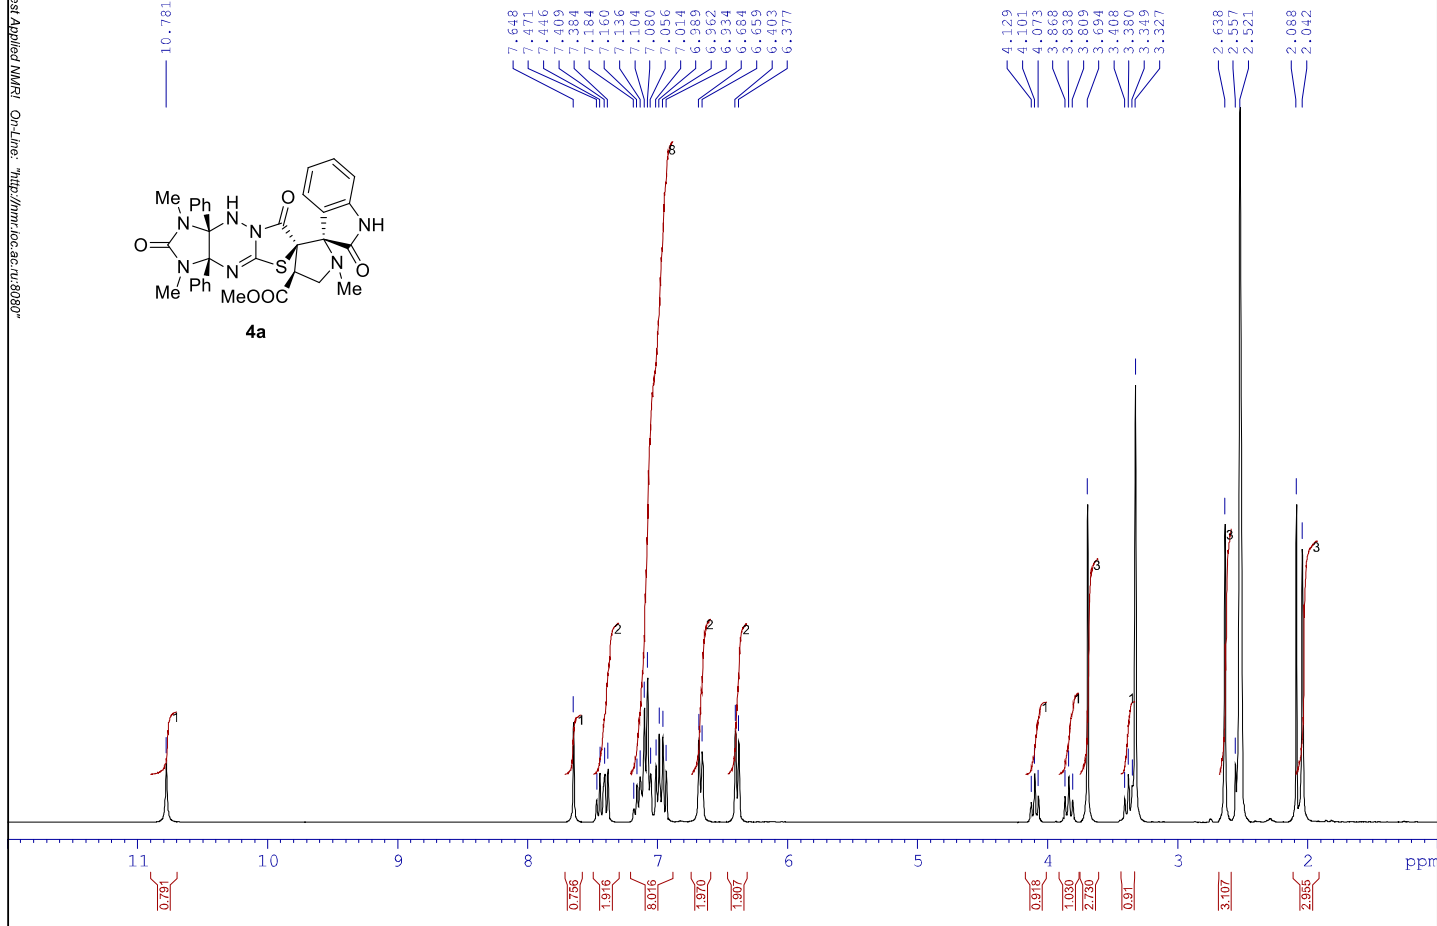

/KANI VDb63.1.1

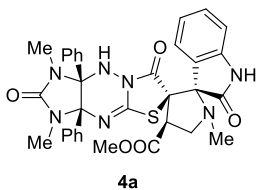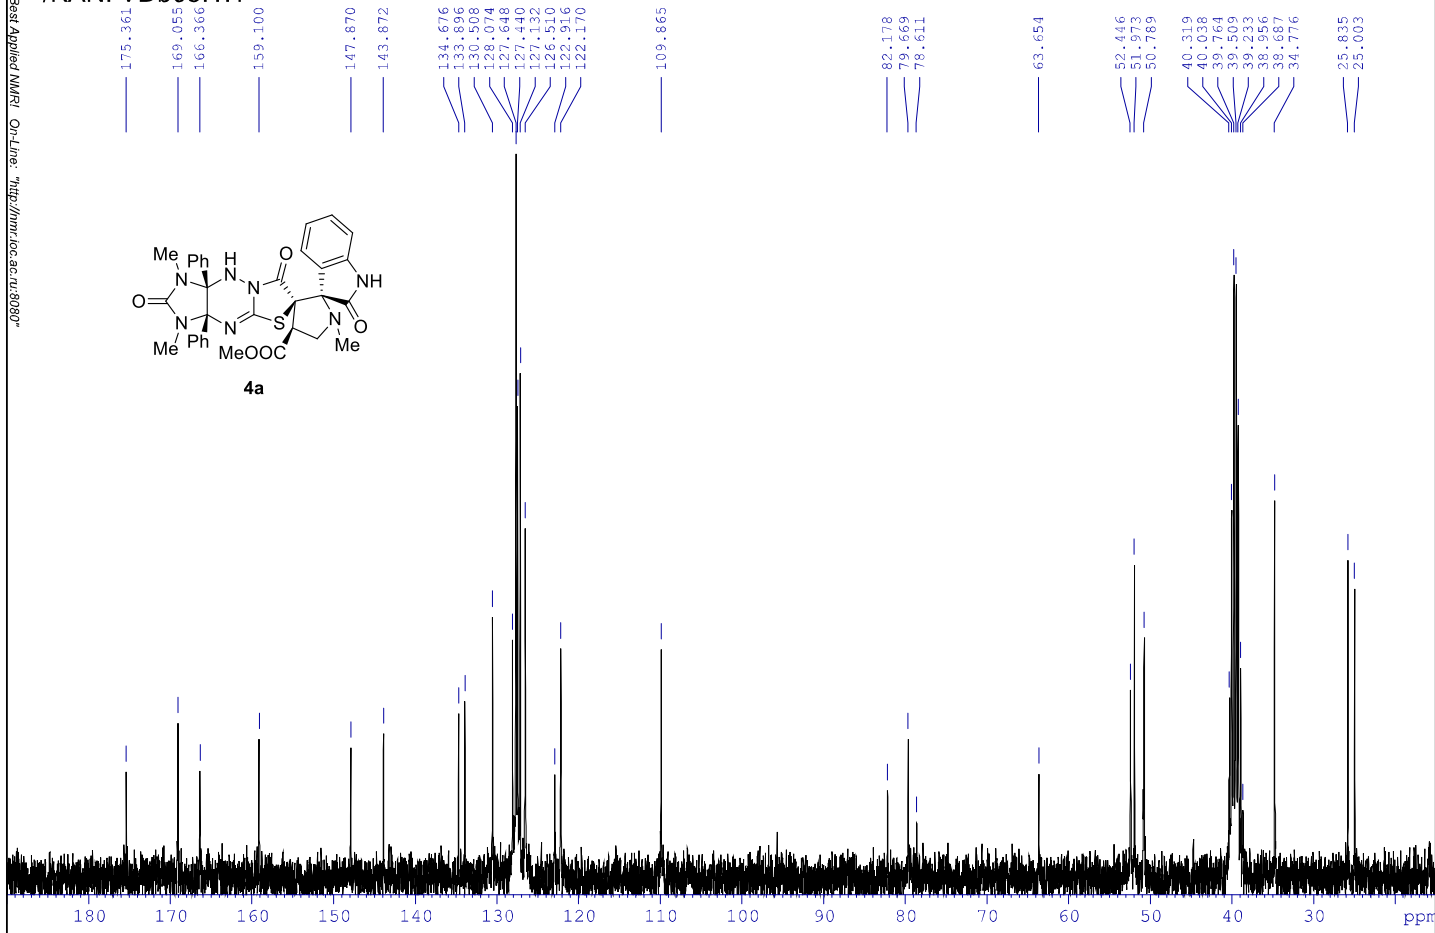

/KANI VDB465.1

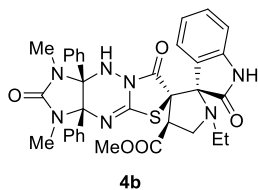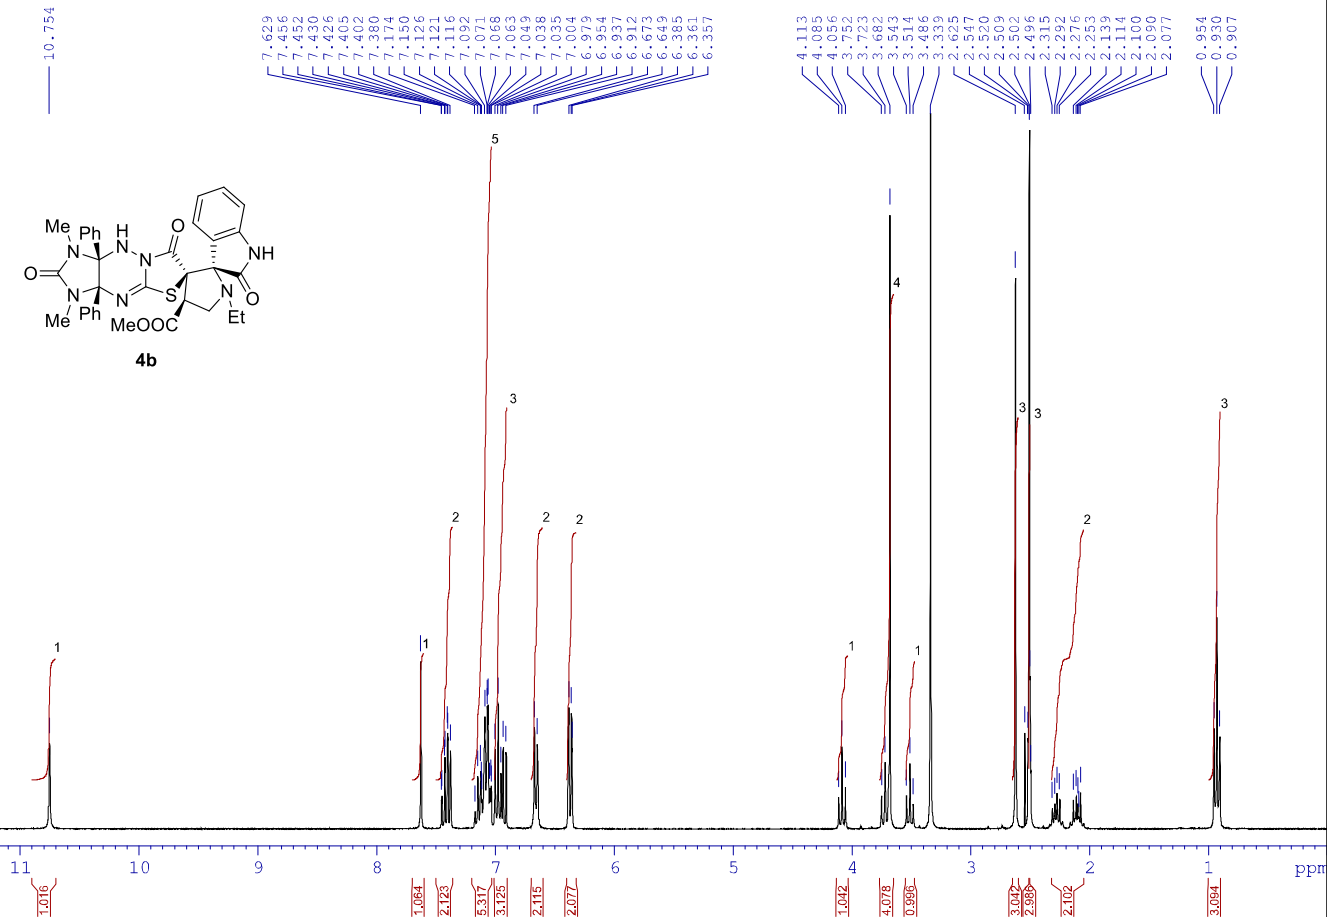

# /KANI VDB67.1 DMSO-d6 13C 27mg 1024scans

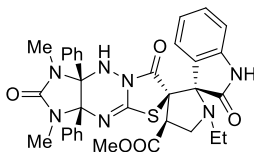

4b

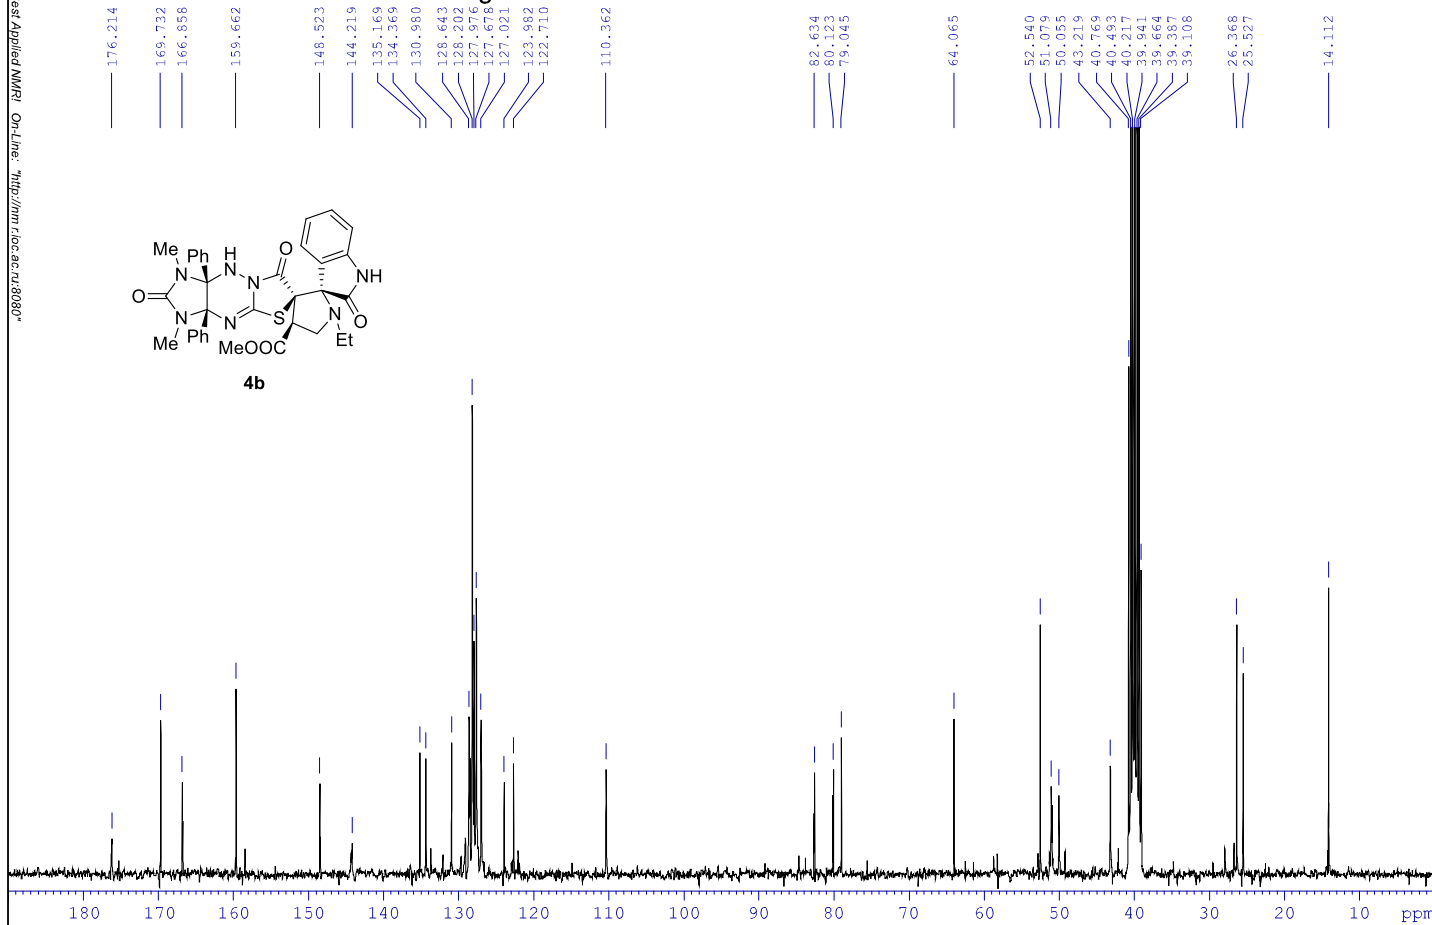

/KANI VDB113-2.1

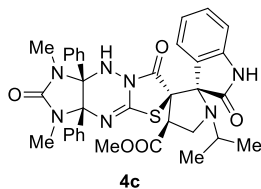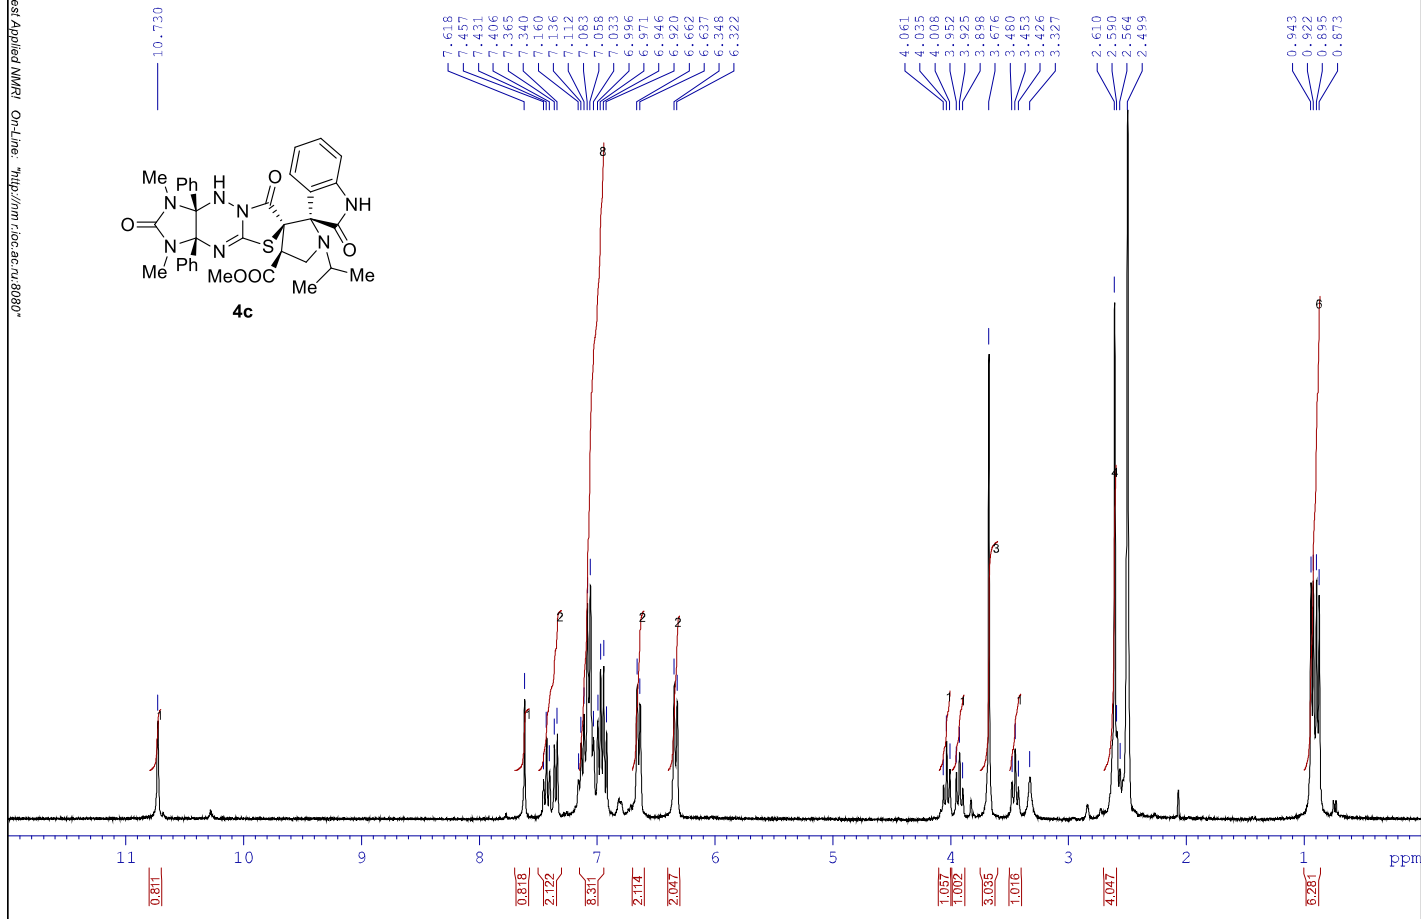



/KANI VDB113

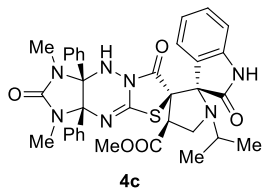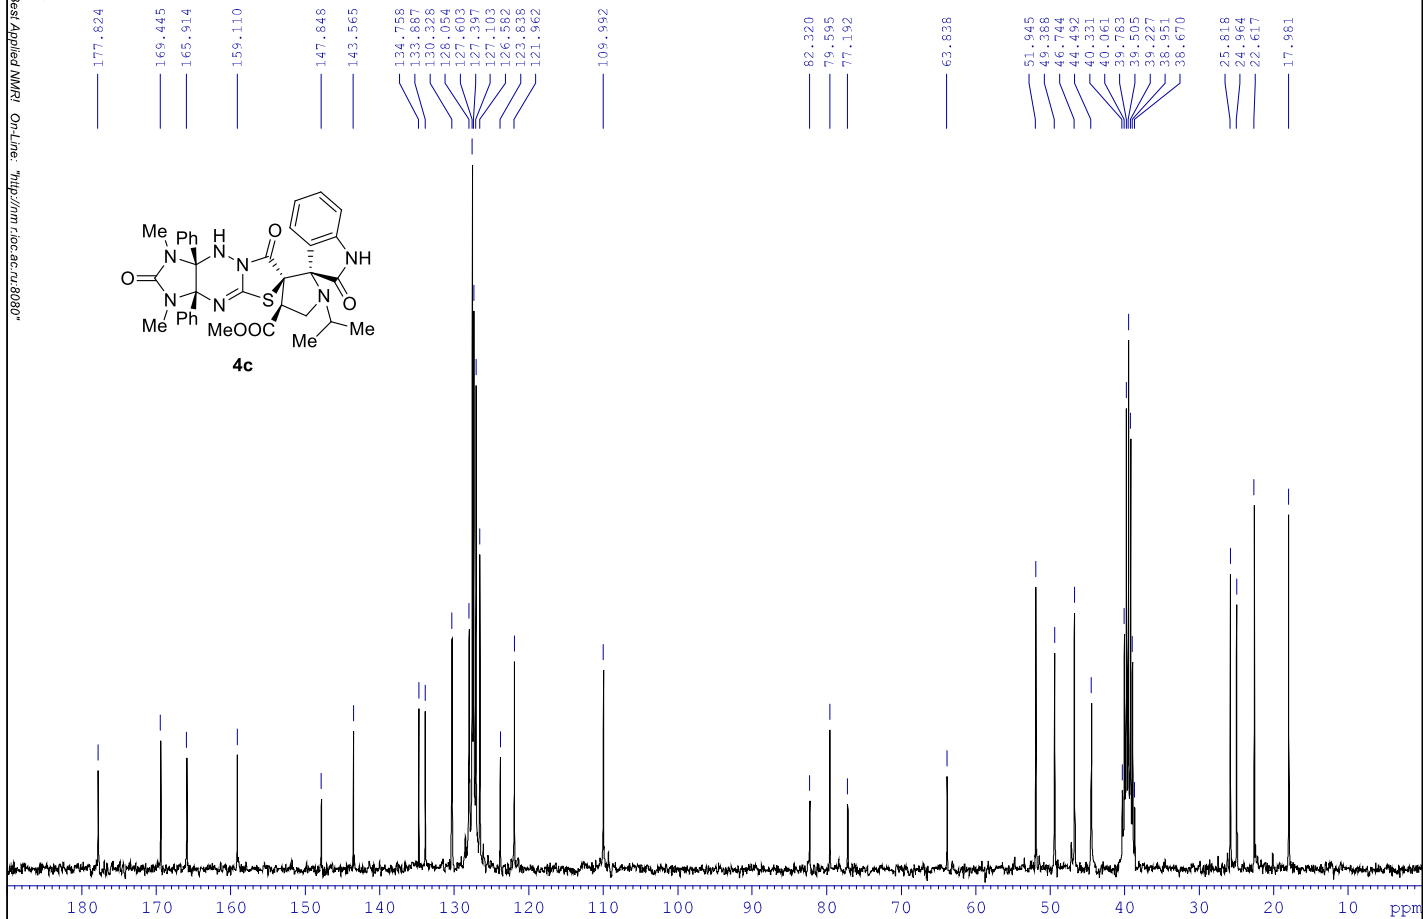

/KANI LEO4.1

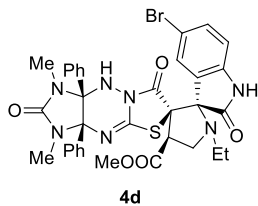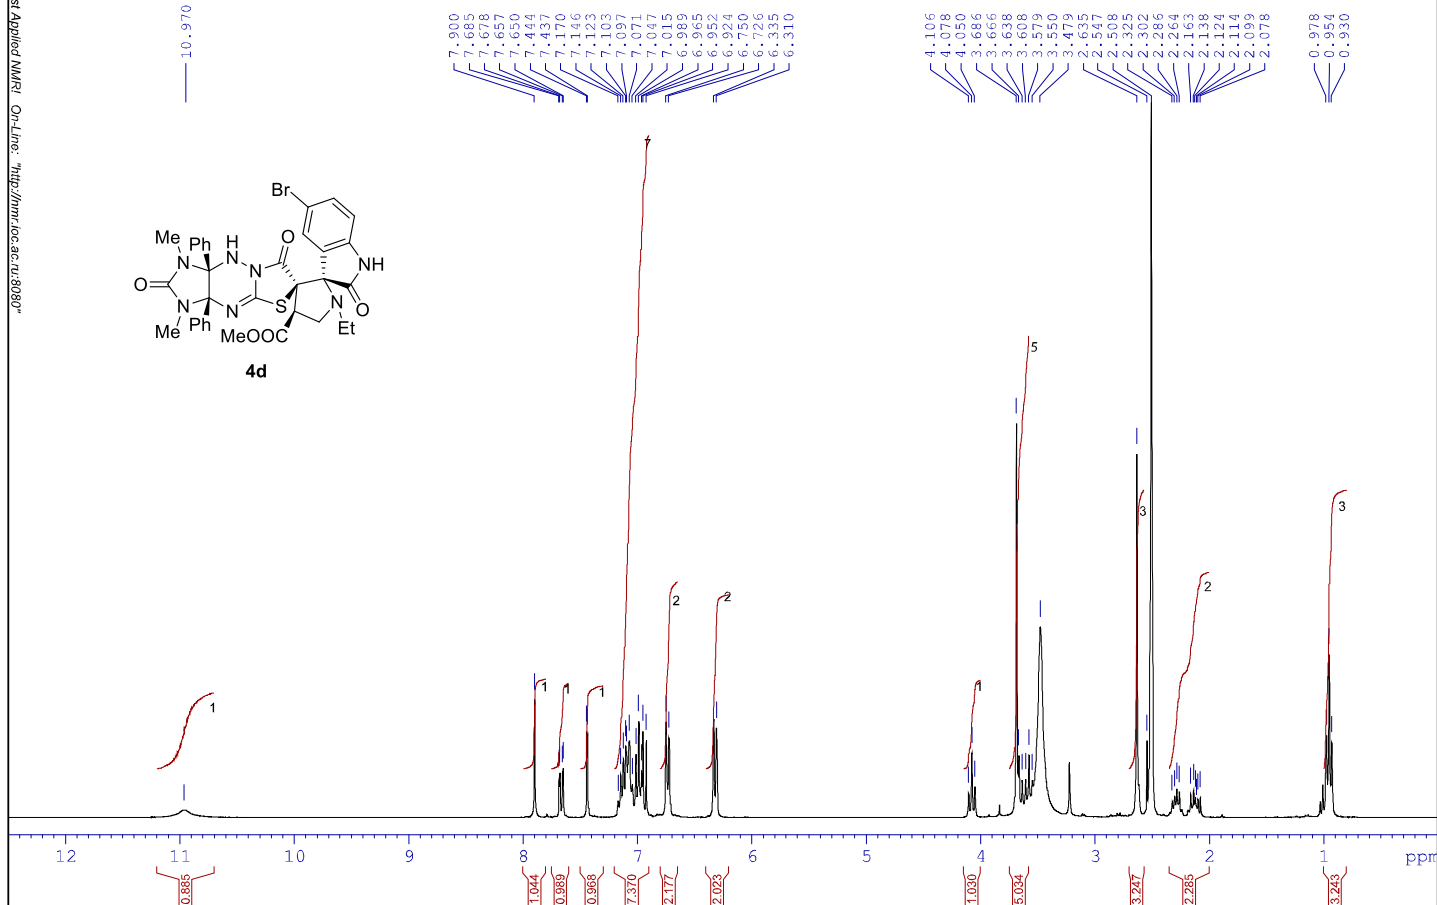

/KANI LEO4.1

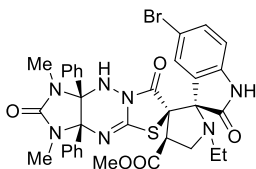

4d

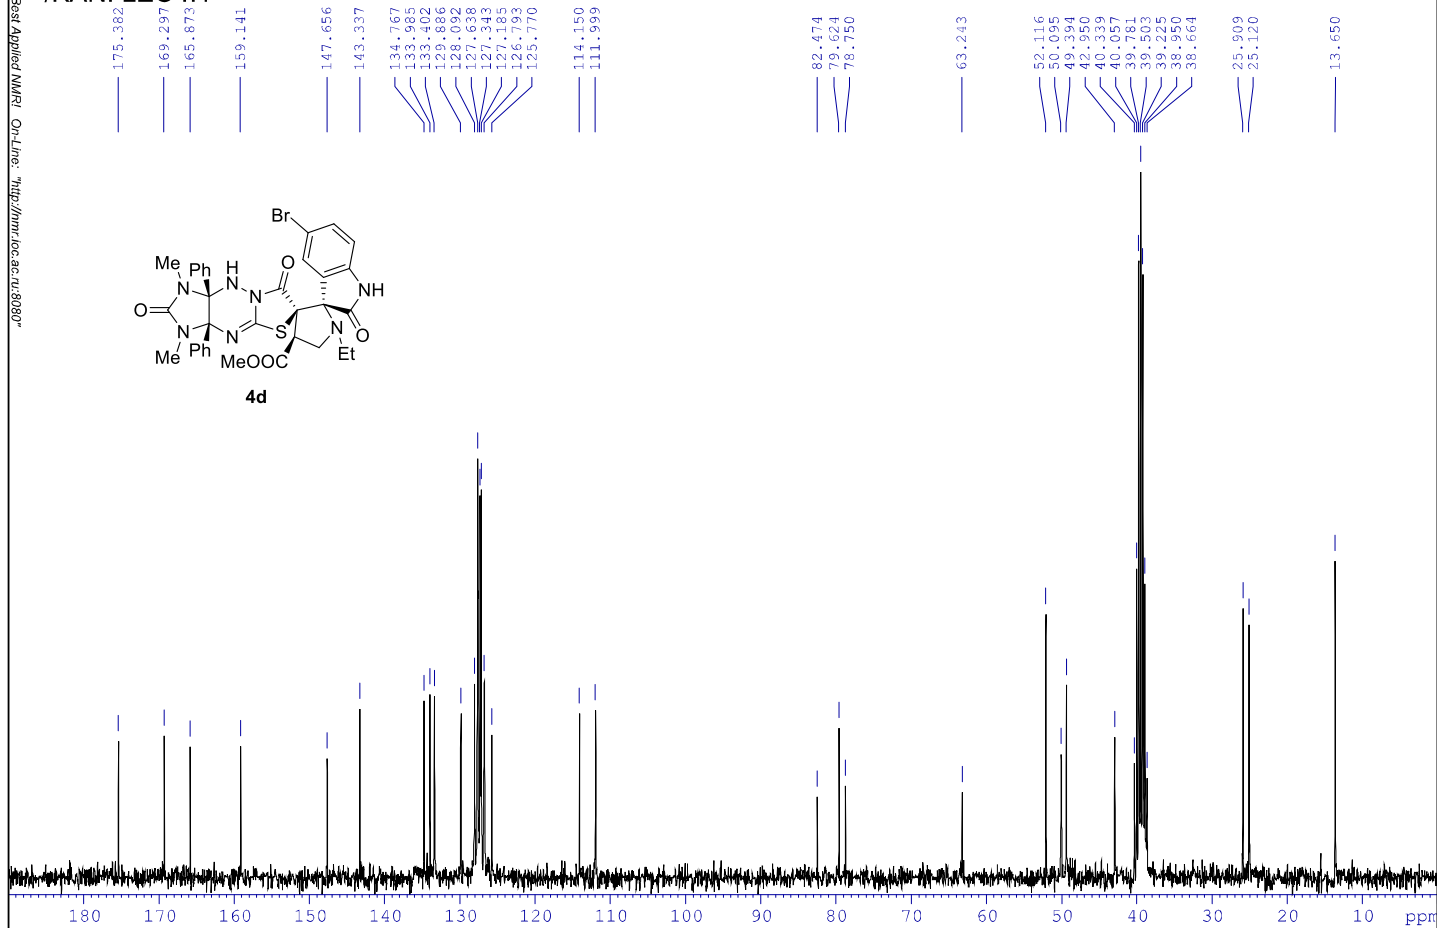

/KANI VDB517.1

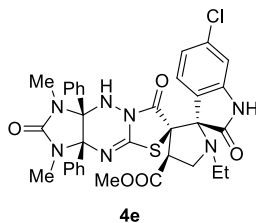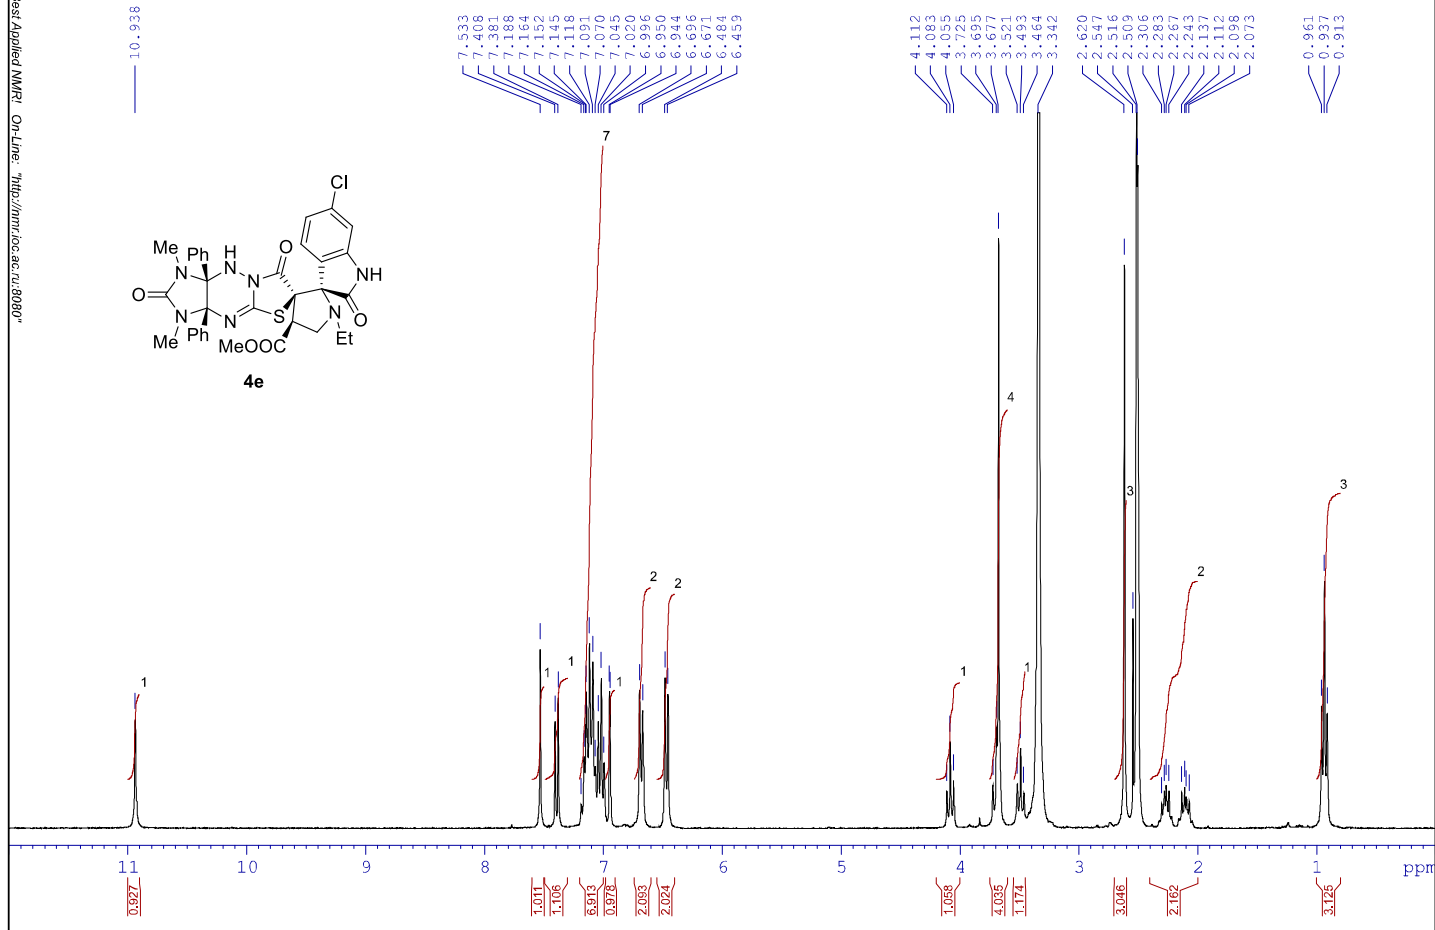

/KANI VDB361.1

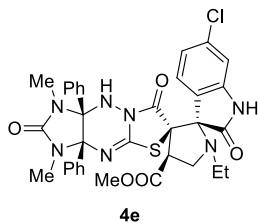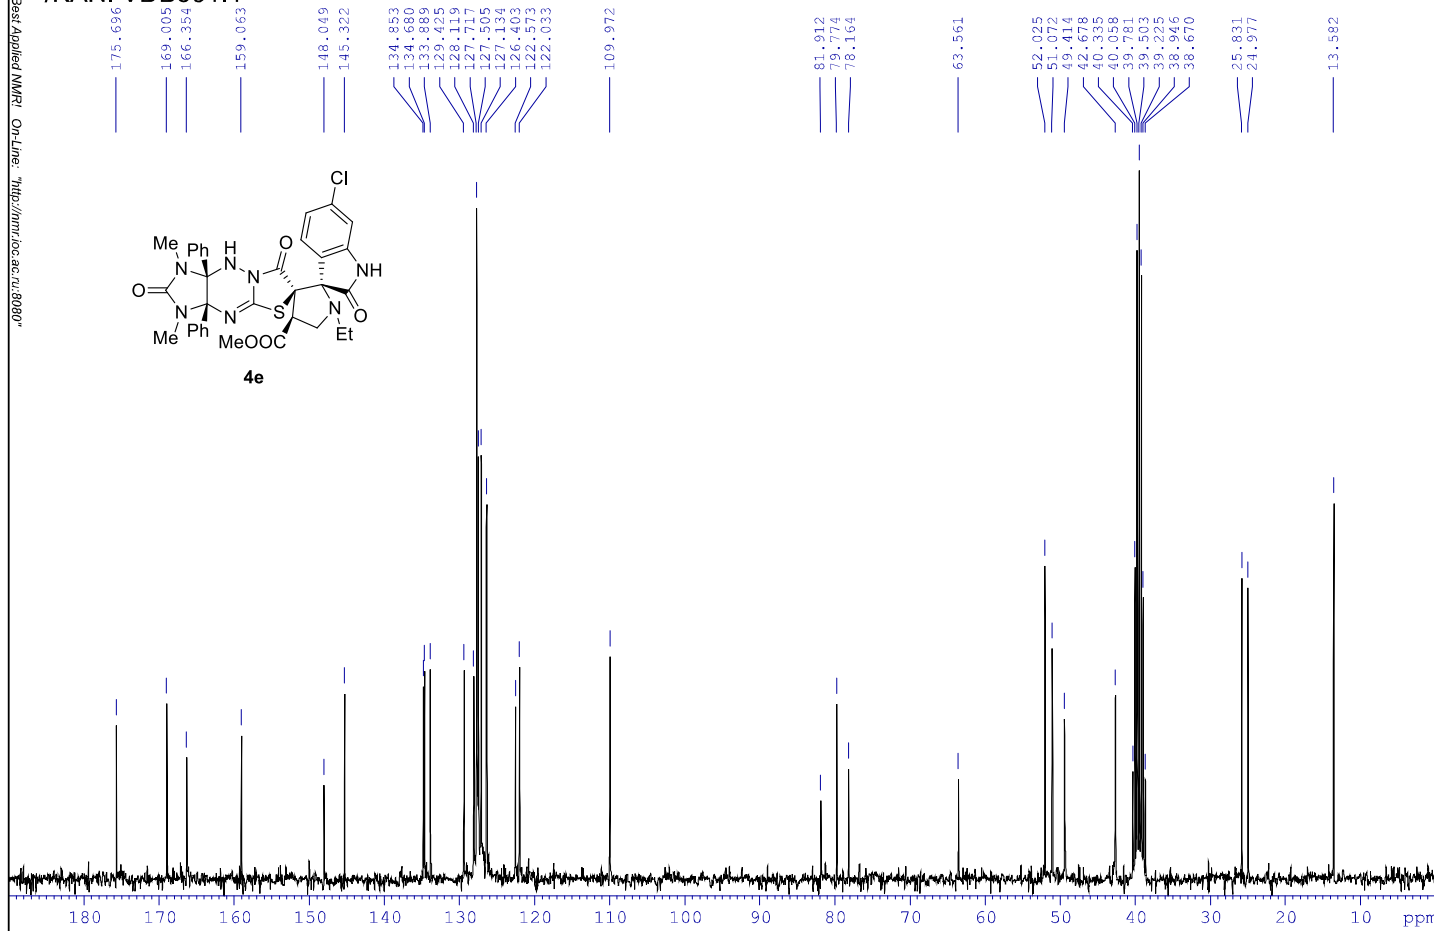

/KANI IA1170.1

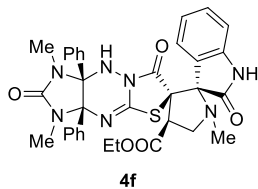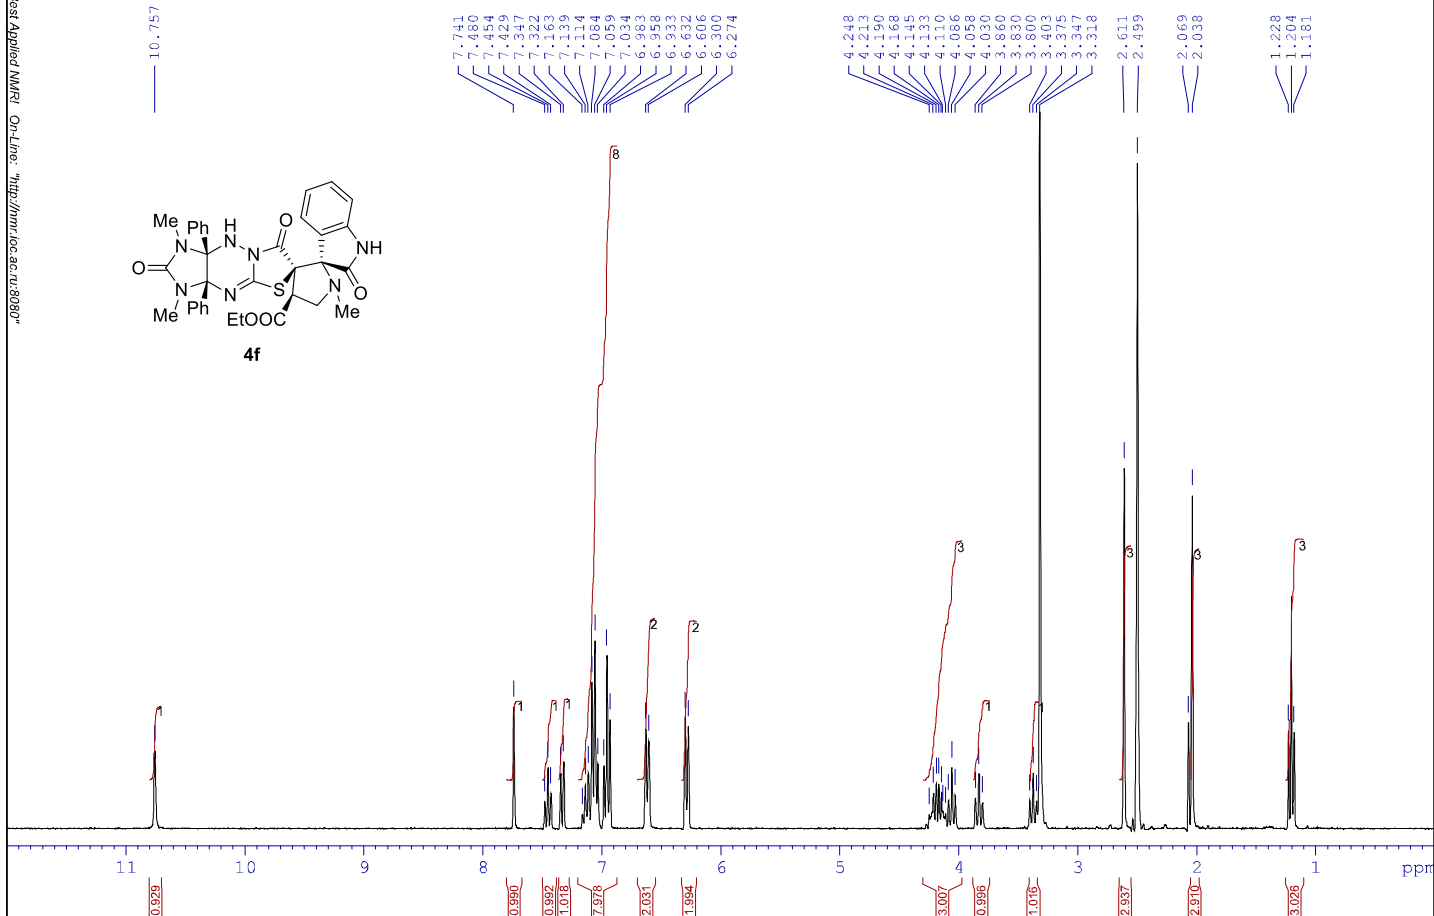

/KANI IA1170.1

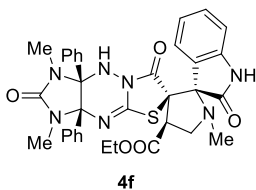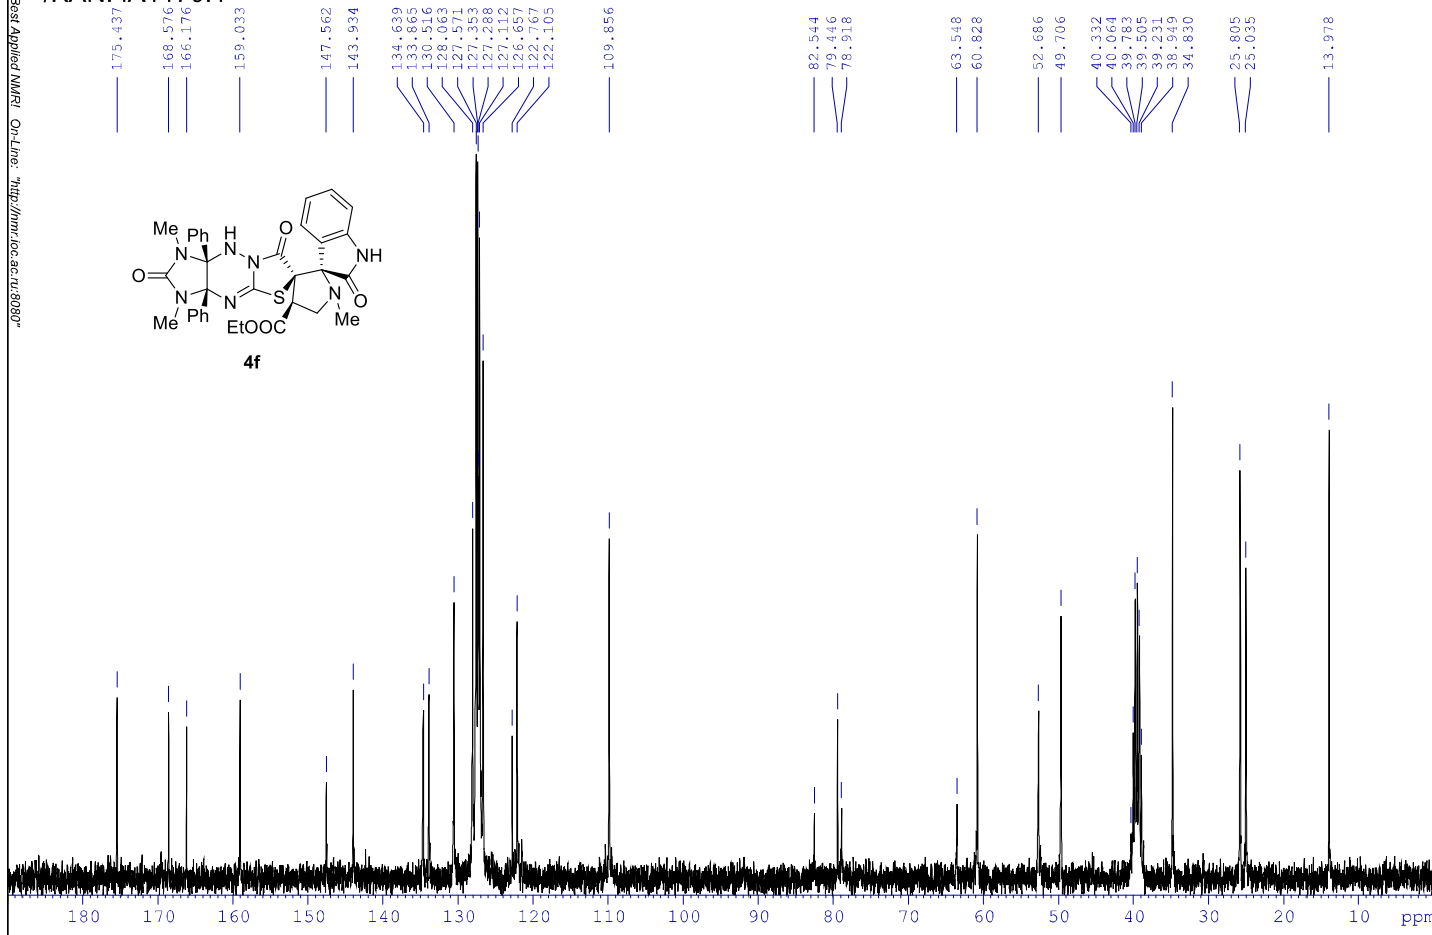

/KANI IA1175.1

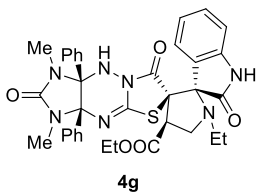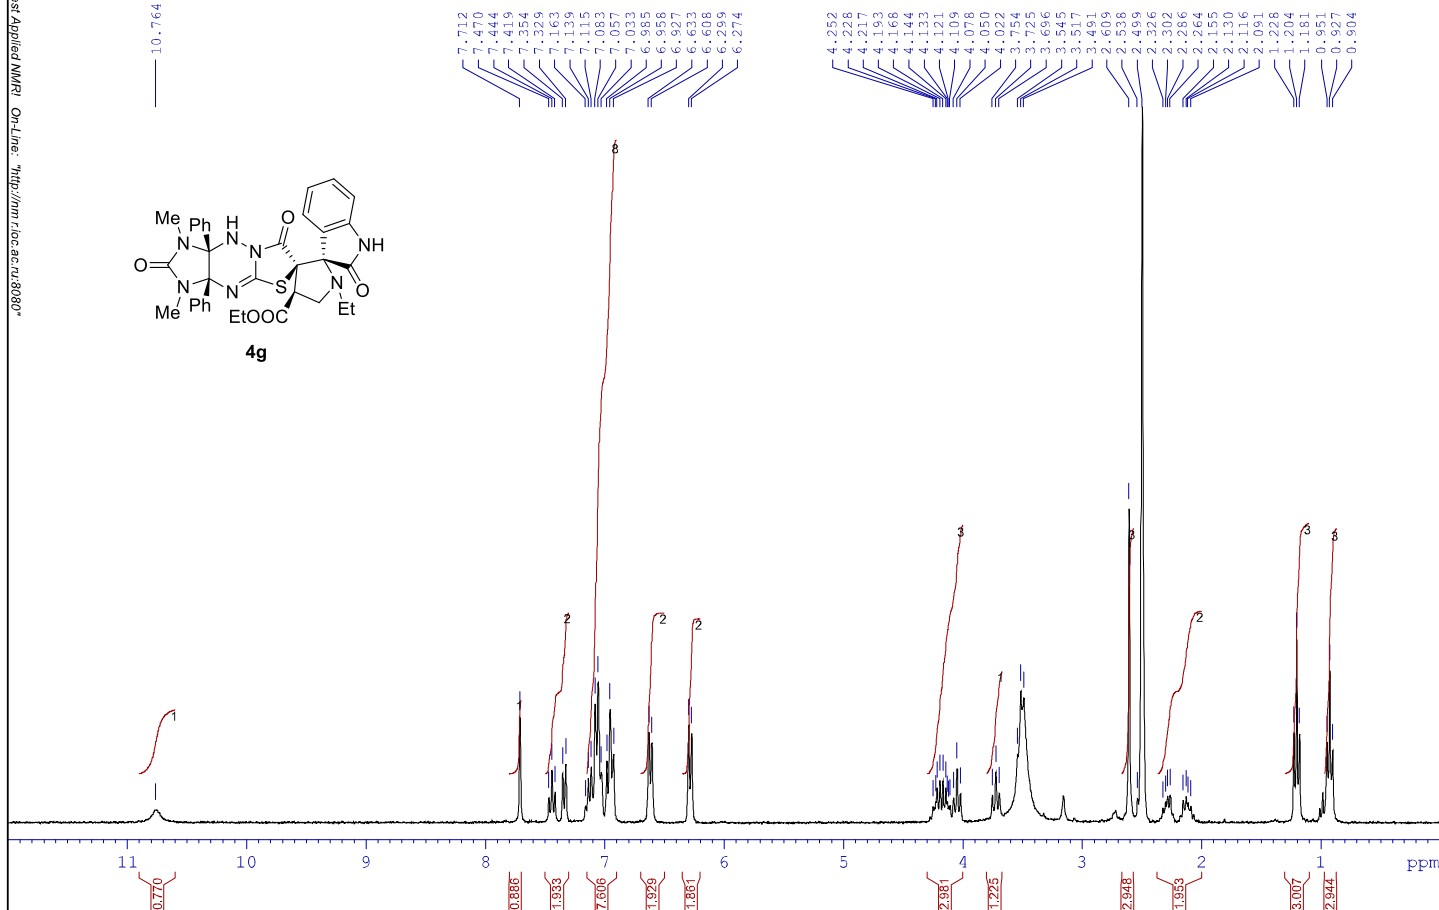



/KANI IA1175.2

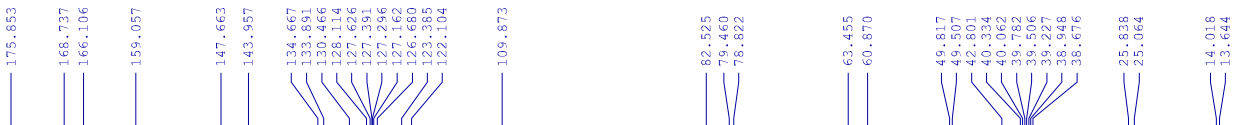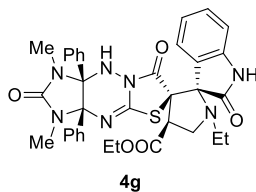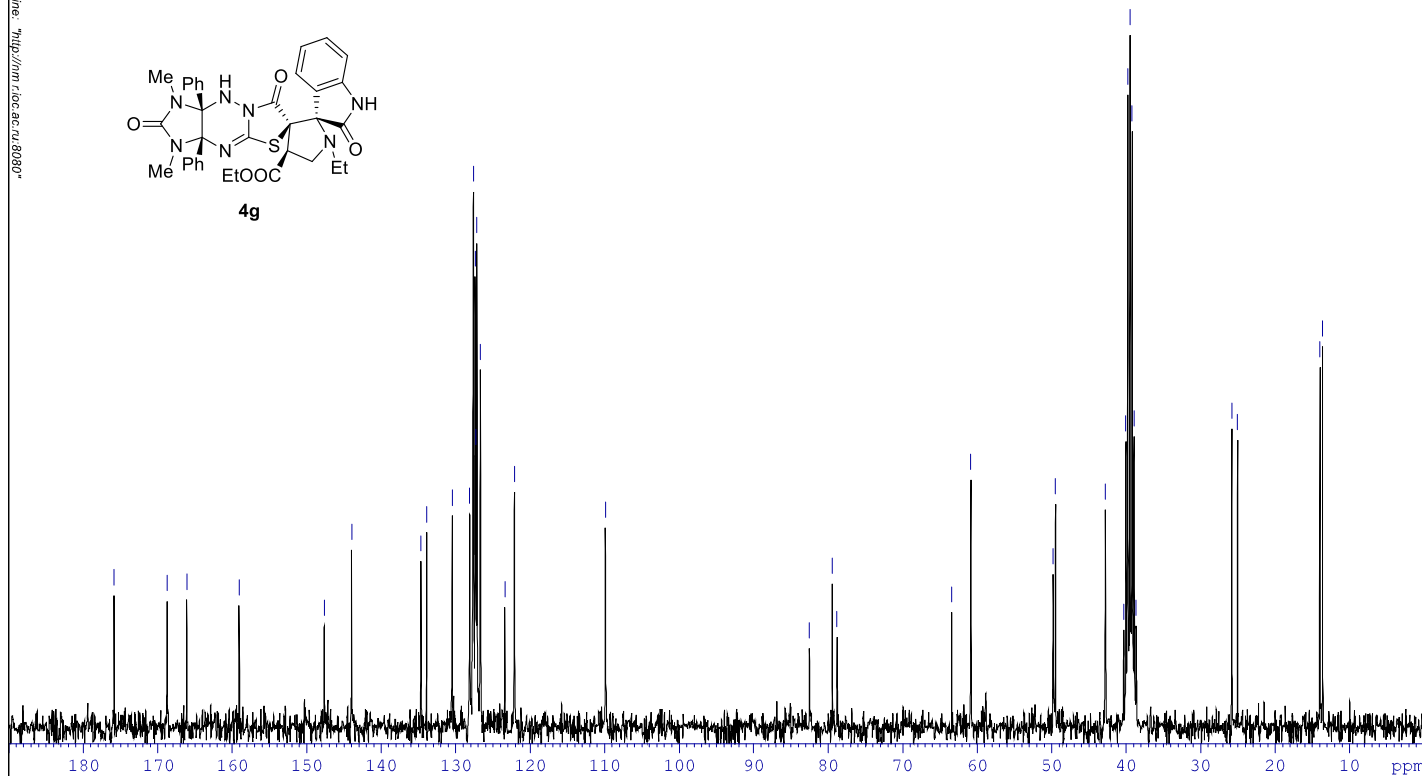

/KANI IA1588.2

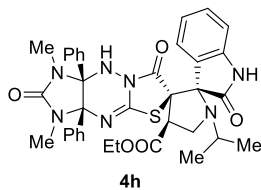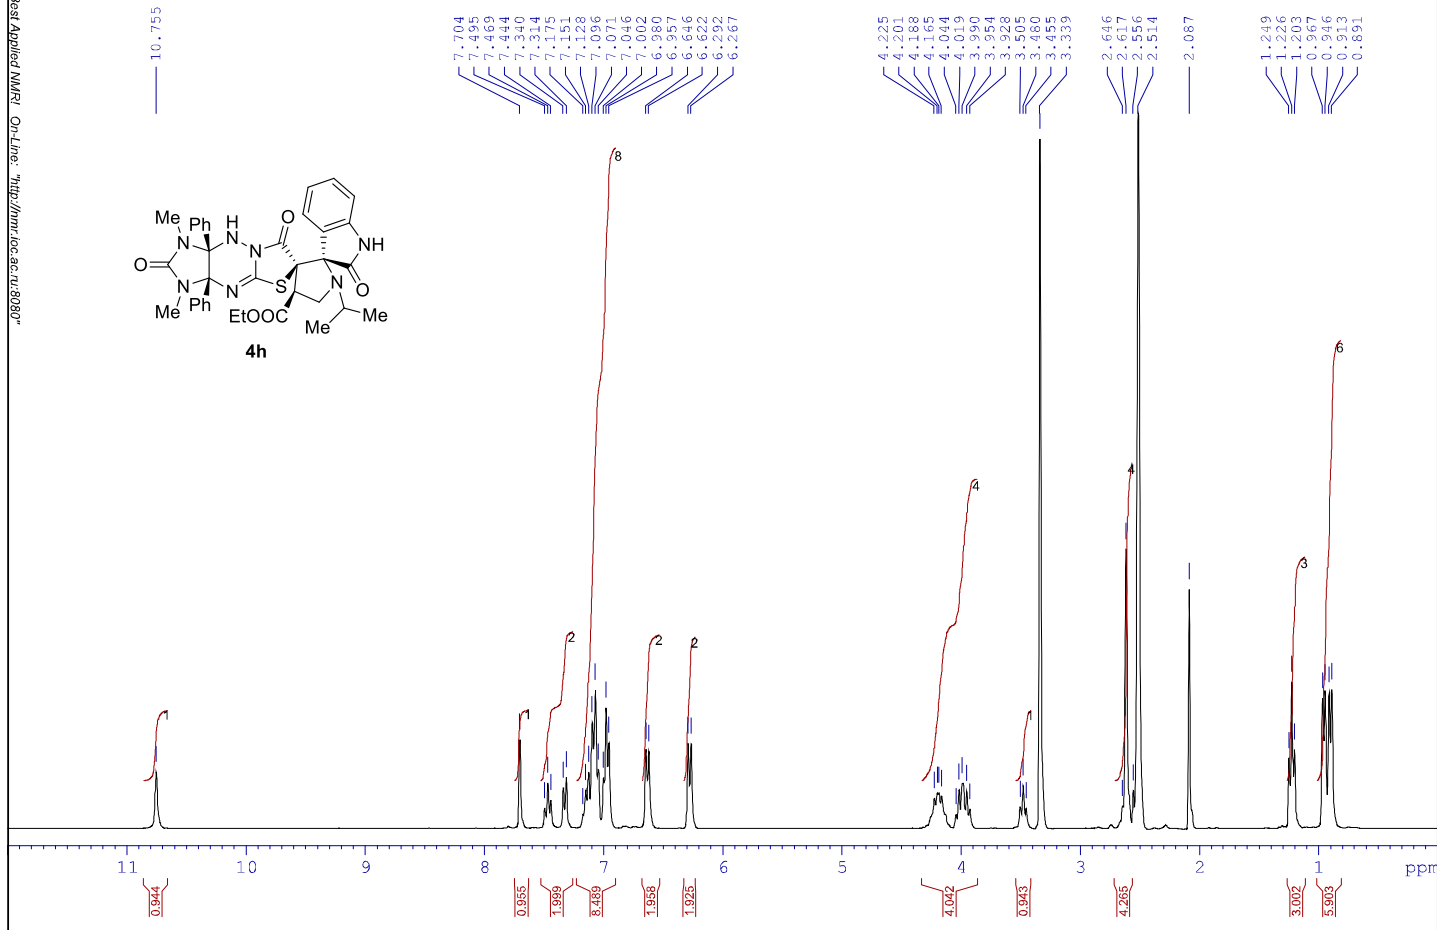

/KANI IA1177.1

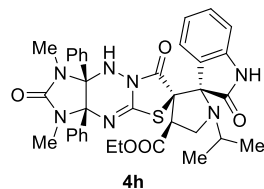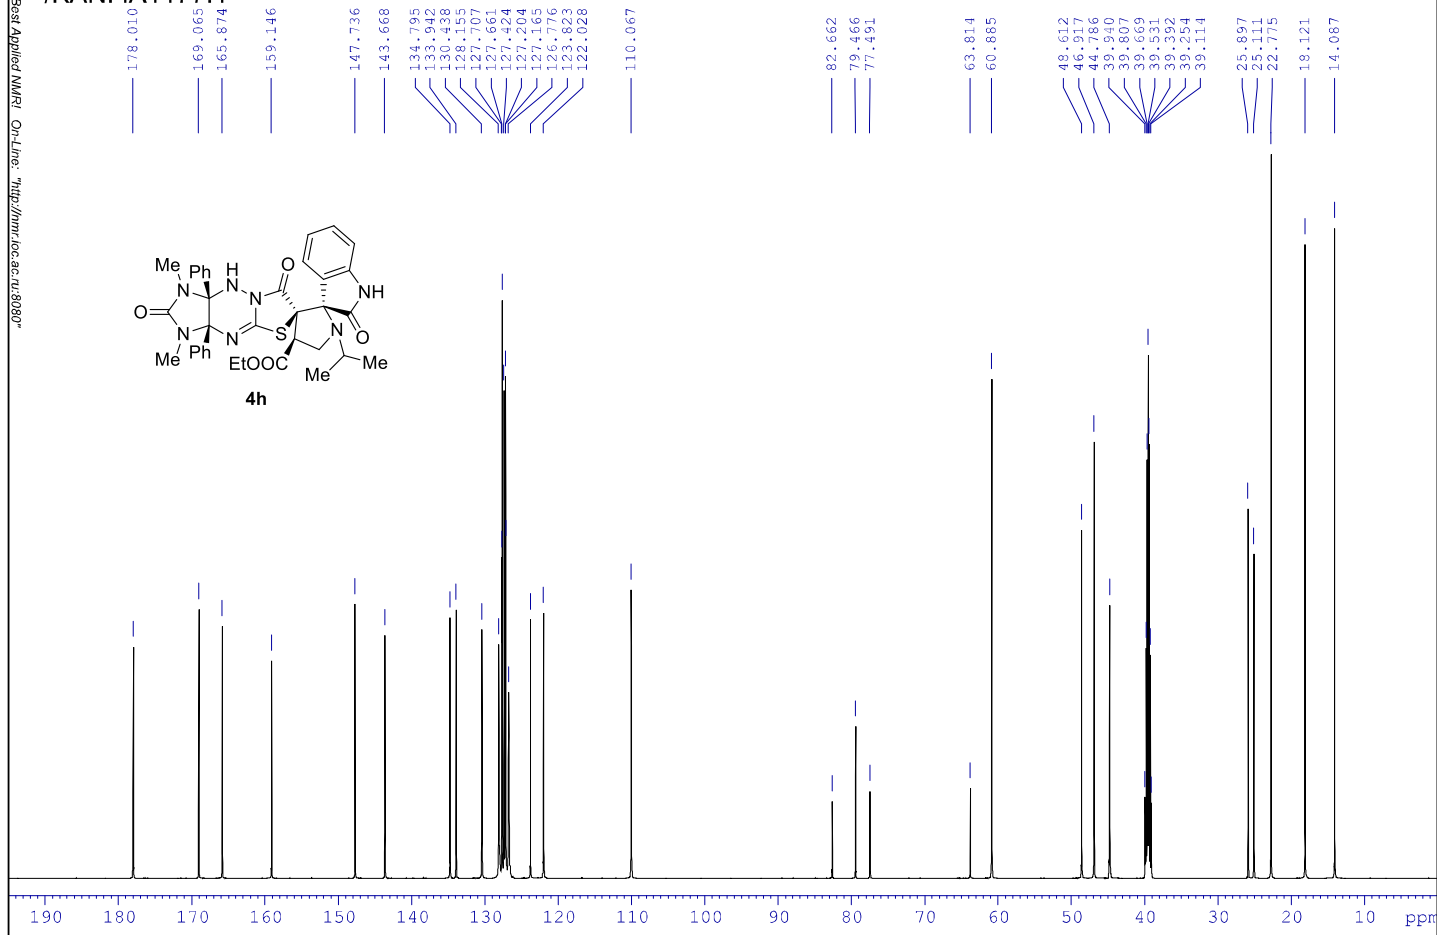

---

10.924

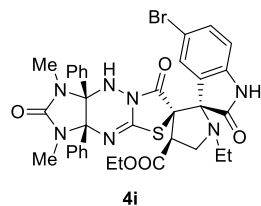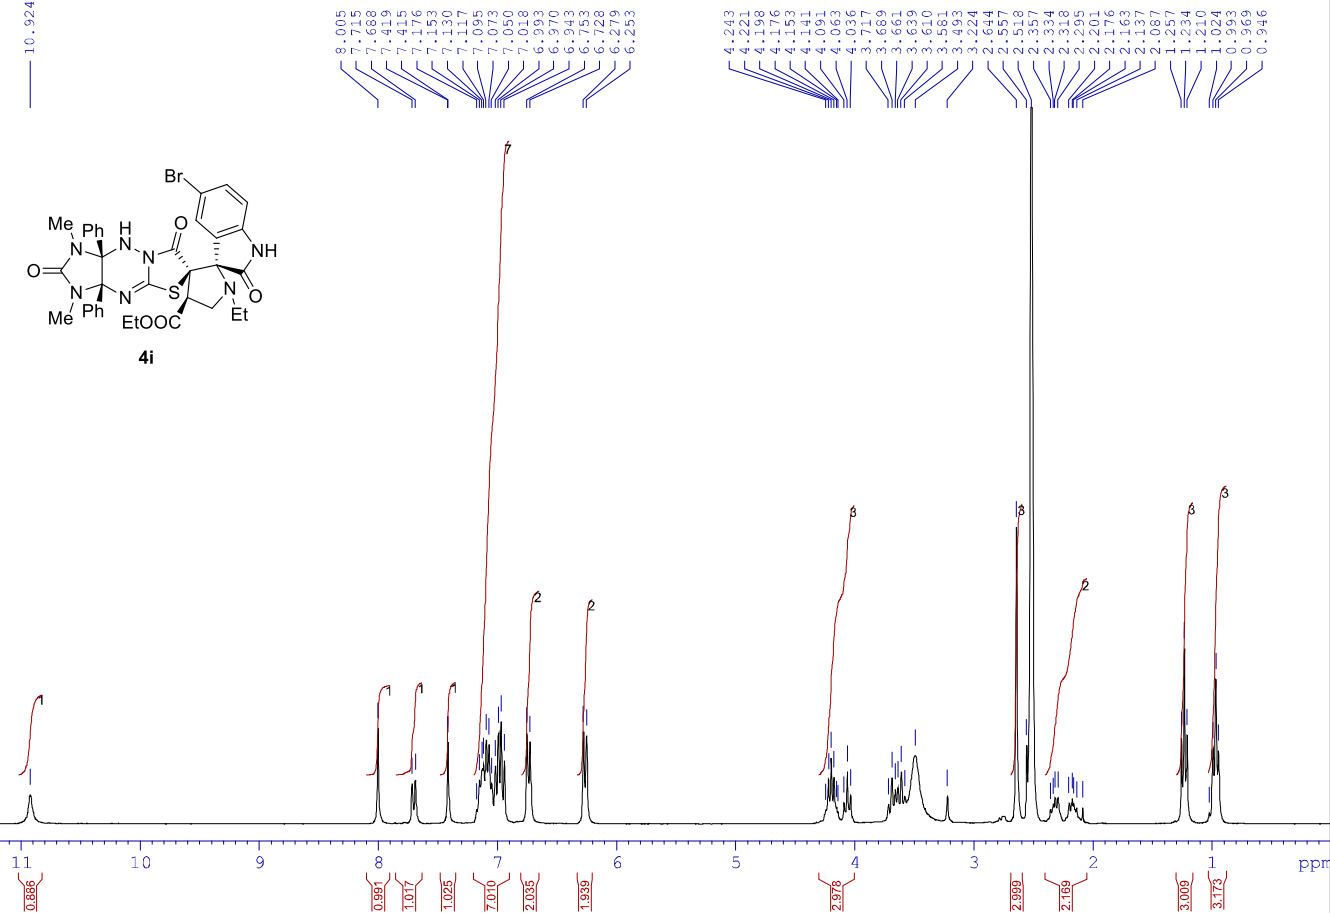

/KANI IA1604.1

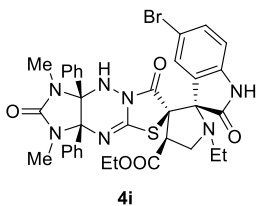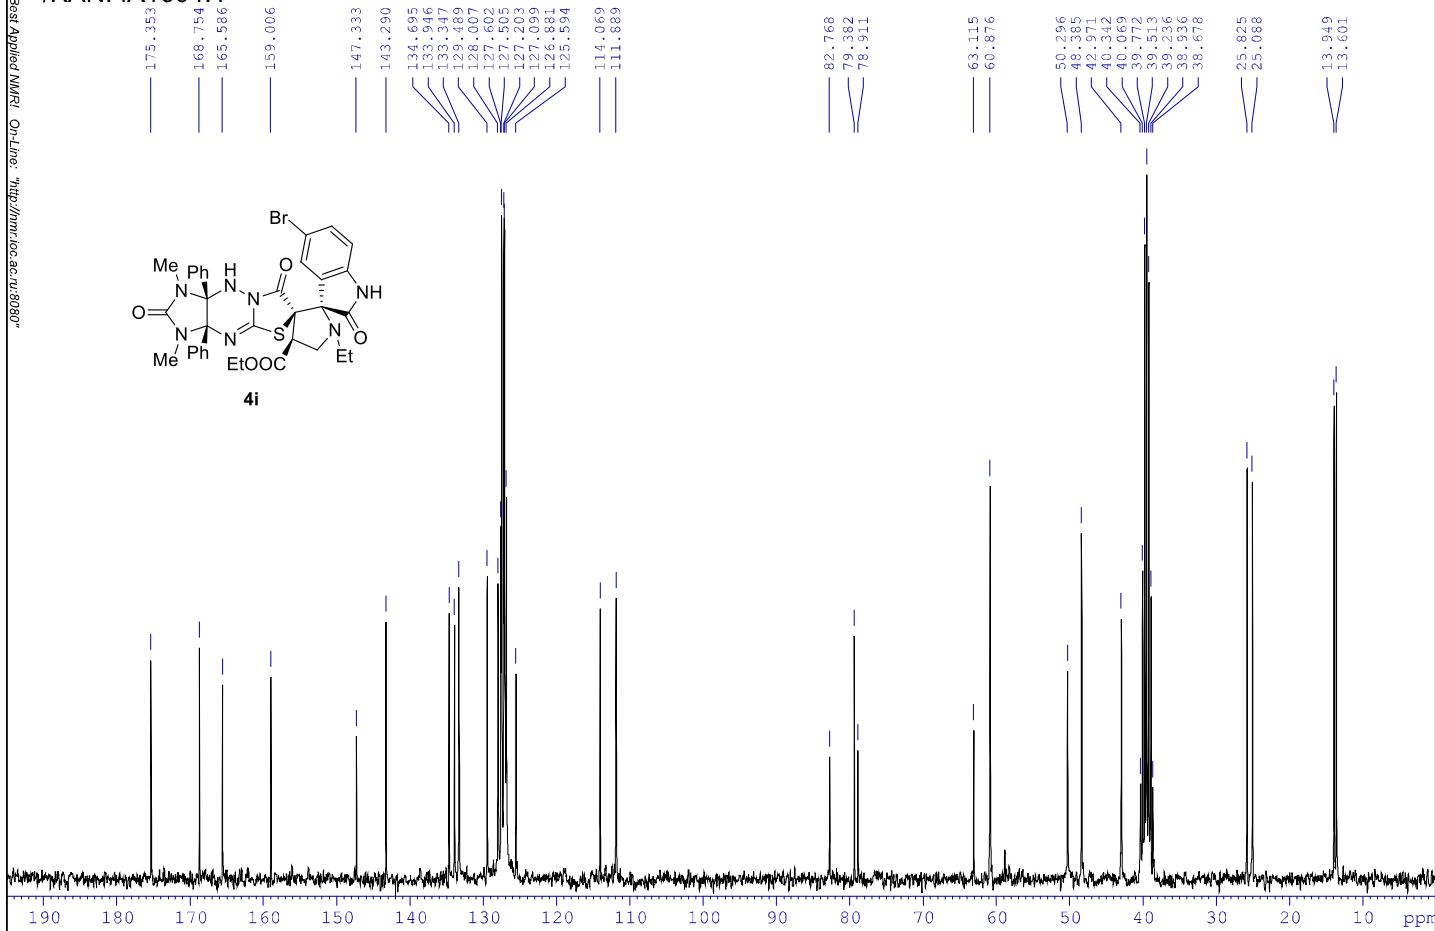

/KANI IA1605.1

10.937

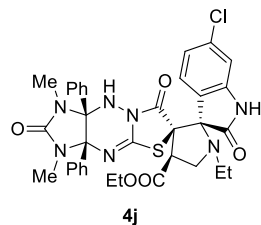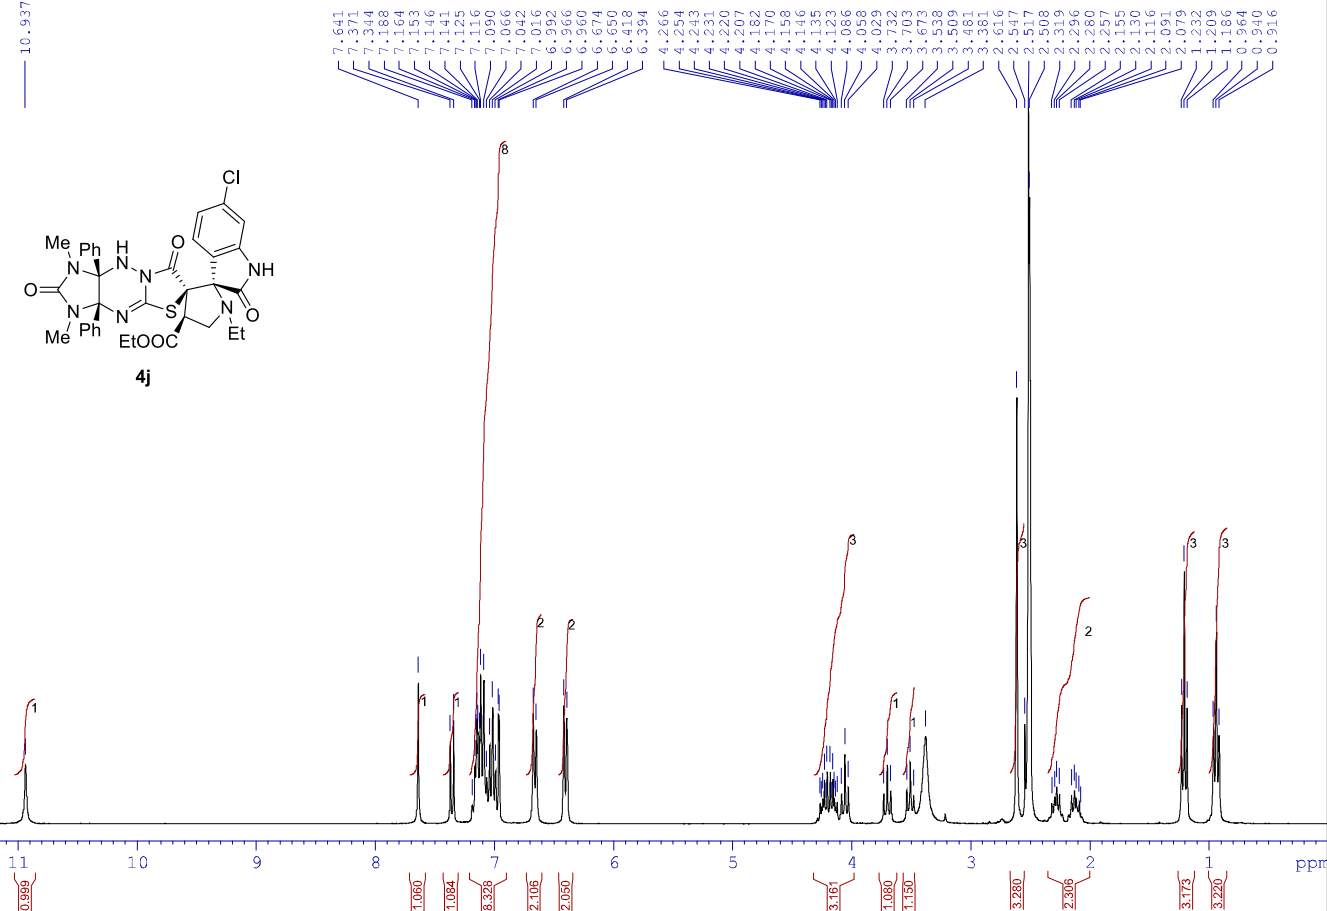

/KANI IA1605.1

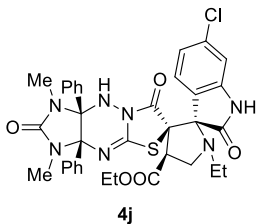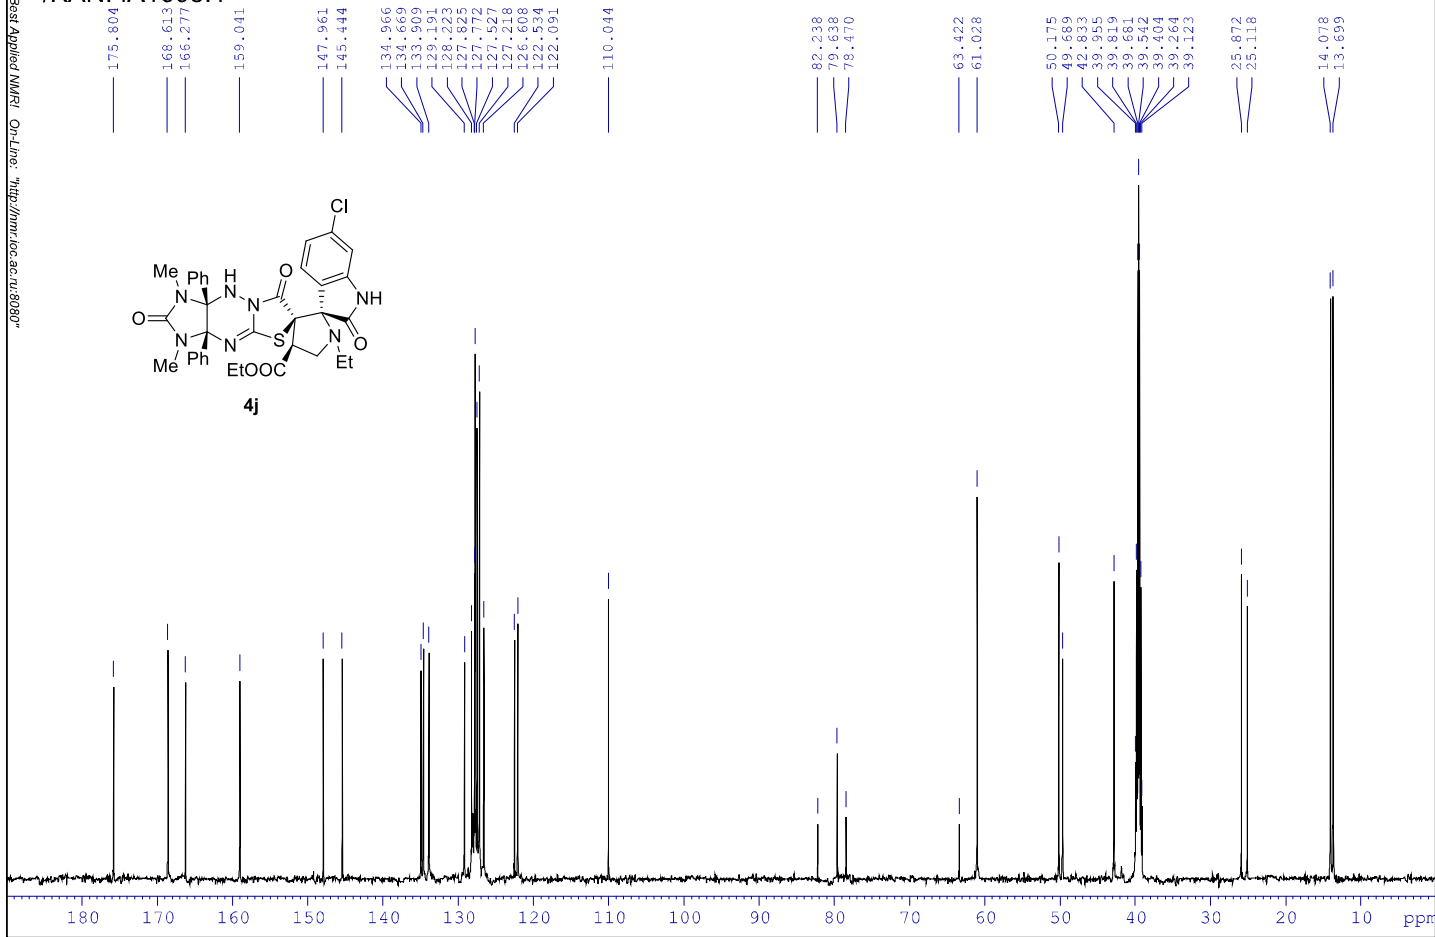

# /KANI VDB86.2

10.745

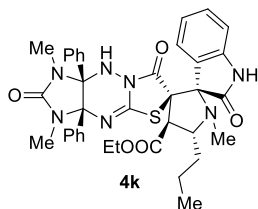

7.791  
7.508  
7.484  
7.460  
7.306  
7.281  
7.162  
7.141  
7.117  
7.082  
7.058  
7.034  
6.972  
6.946  
6.920  
6.617  
6.591  
6.230  
6.202  
4.236  
4.212  
4.200  
4.176  
4.169  
4.145  
4.133  
4.121  
4.109  
4.071  
4.054  
4.042  
4.016  
3.612  
3.584  
3.519  
3.295  
2.610  
2.605  
2.600  
2.494  
2.487  
1.979  
1.755  
1.735  
1.728  
1.708  
1.683  
1.677  
1.609  
1.584  
1.557  
1.539  
1.441  
1.416  
1.391  
1.377  
1.362  
1.326  
1.206  
1.185  
0.961  
0.936  
0.914

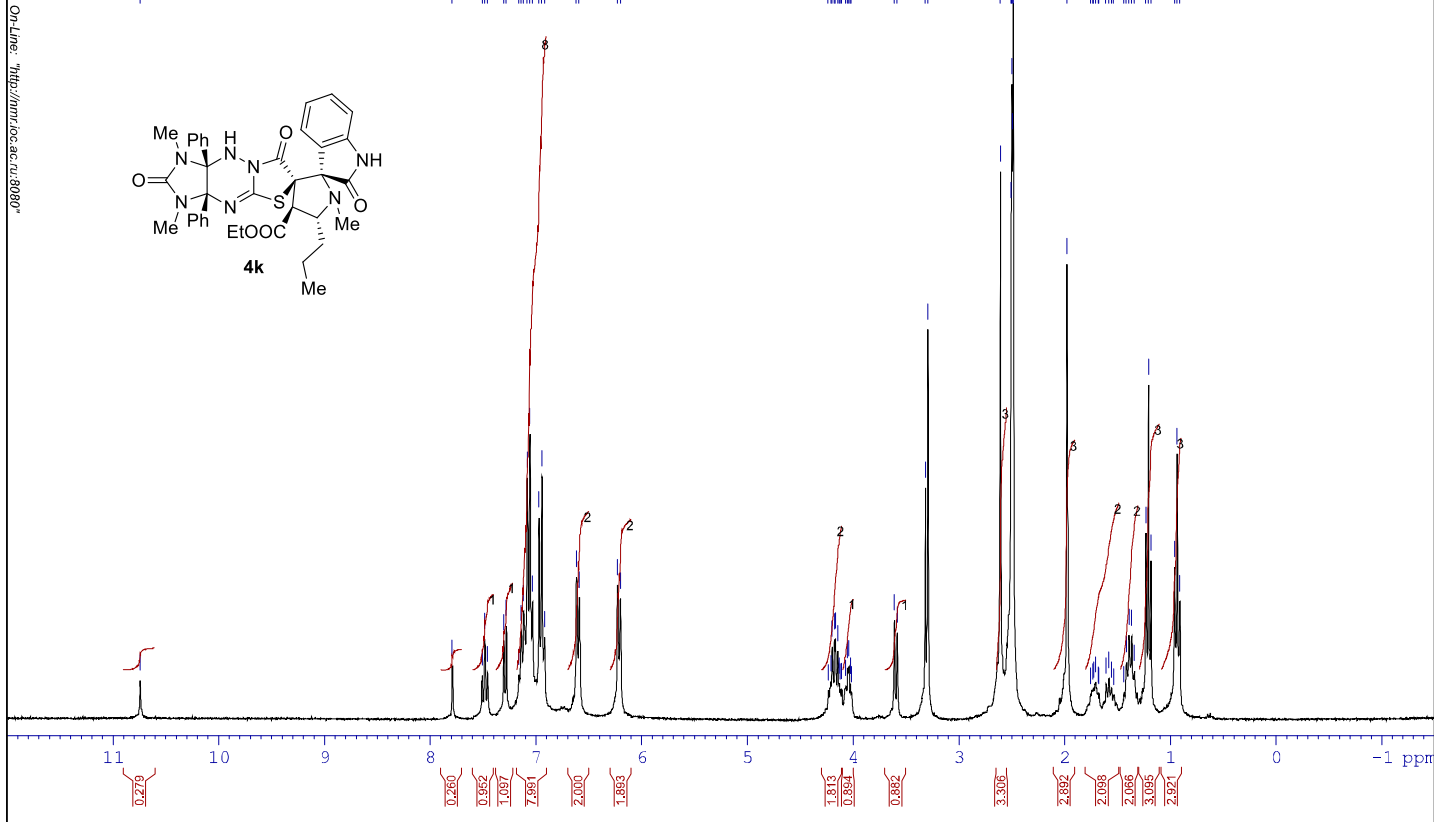



/KANI VDB86.2

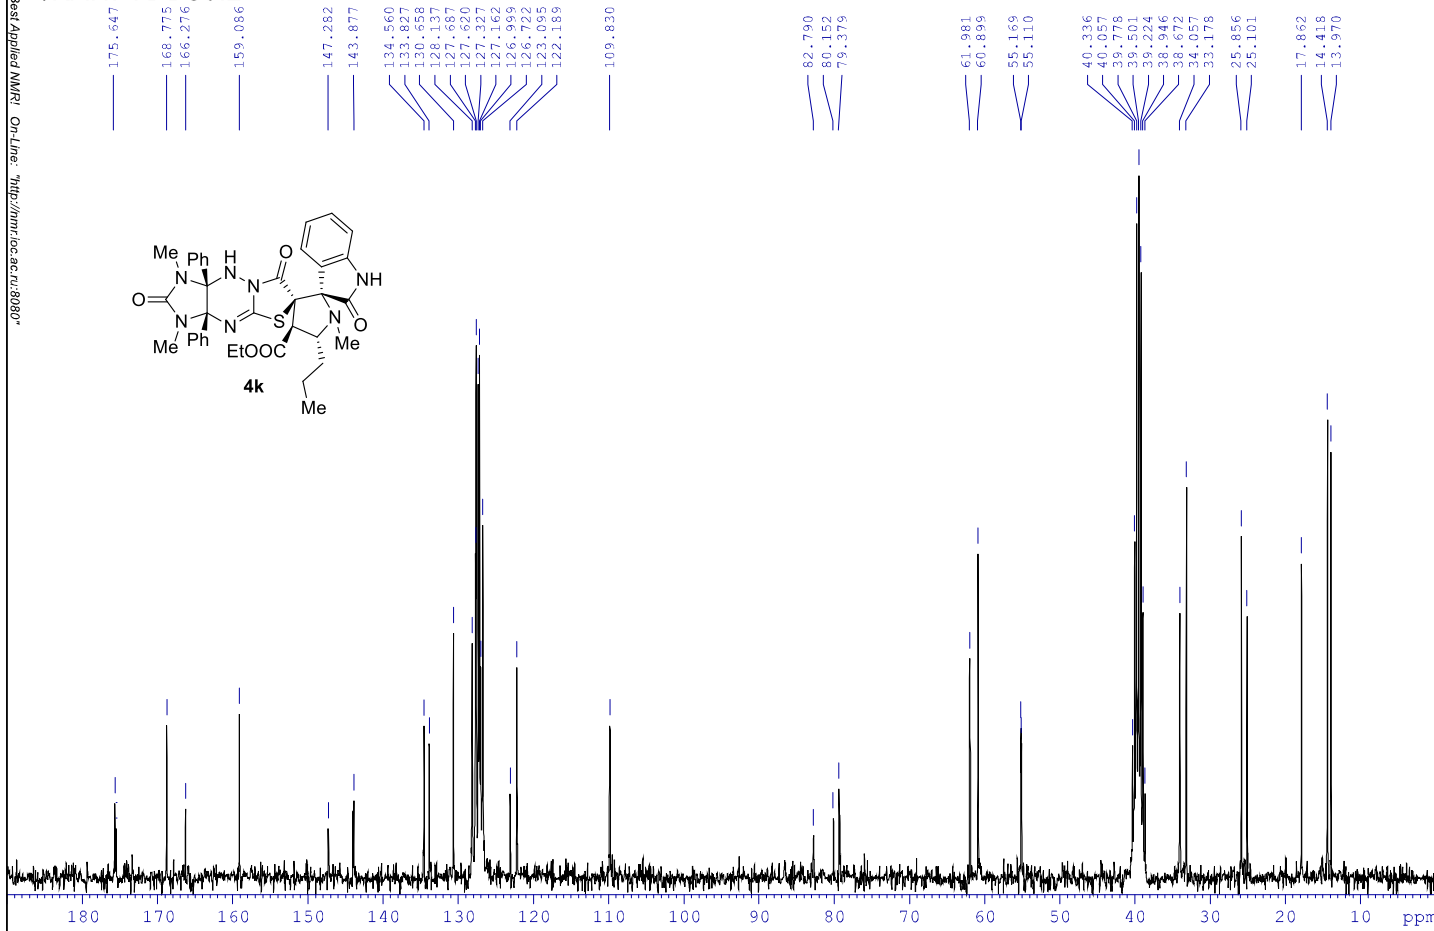

/KANI IA1670.2

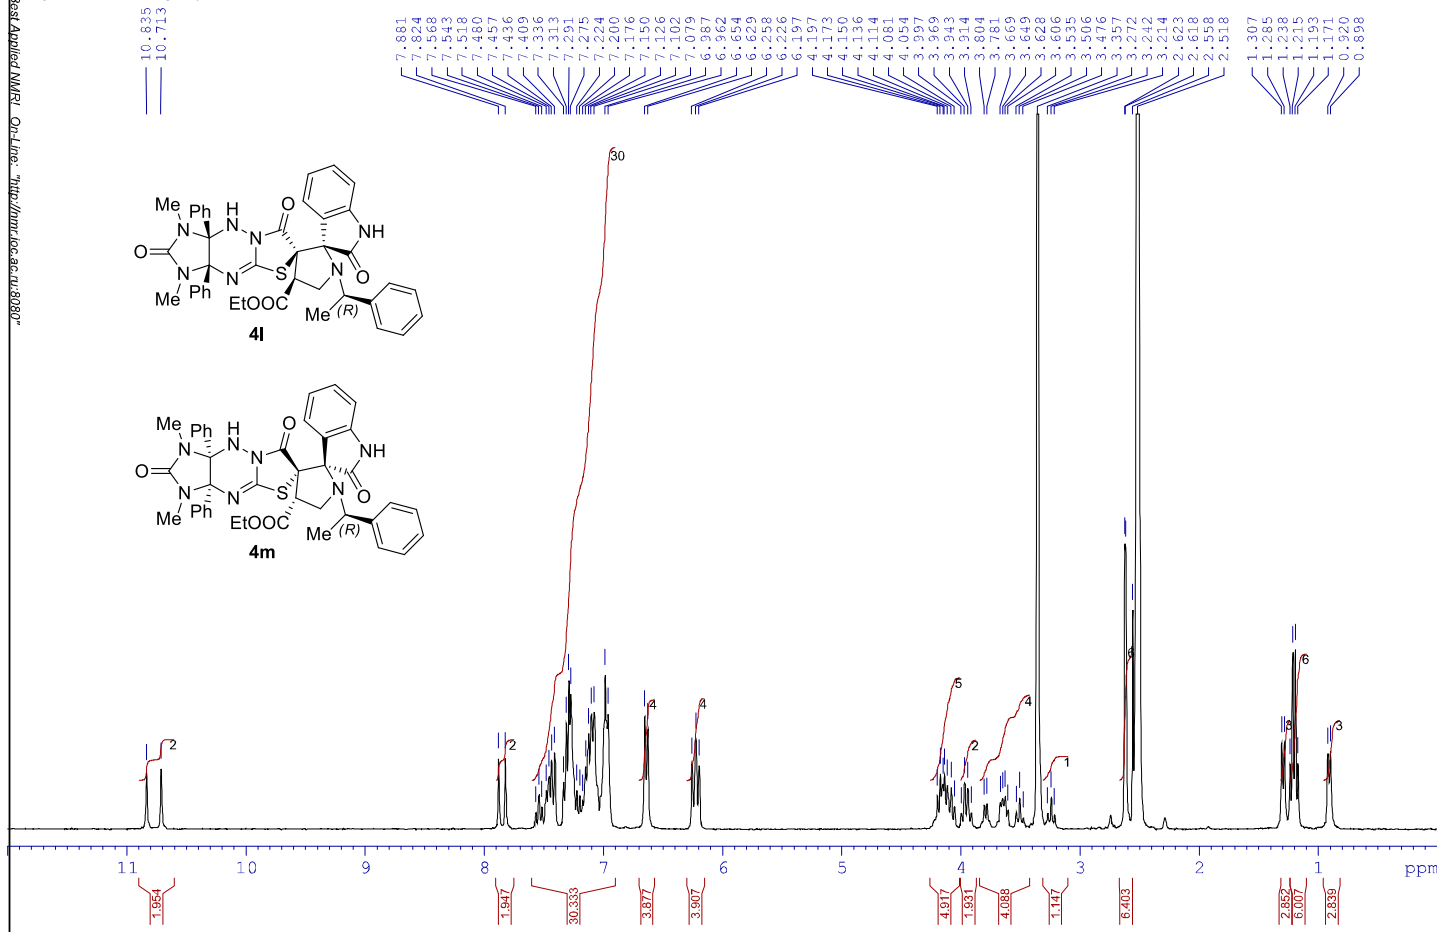

# /KANI IA1670.2

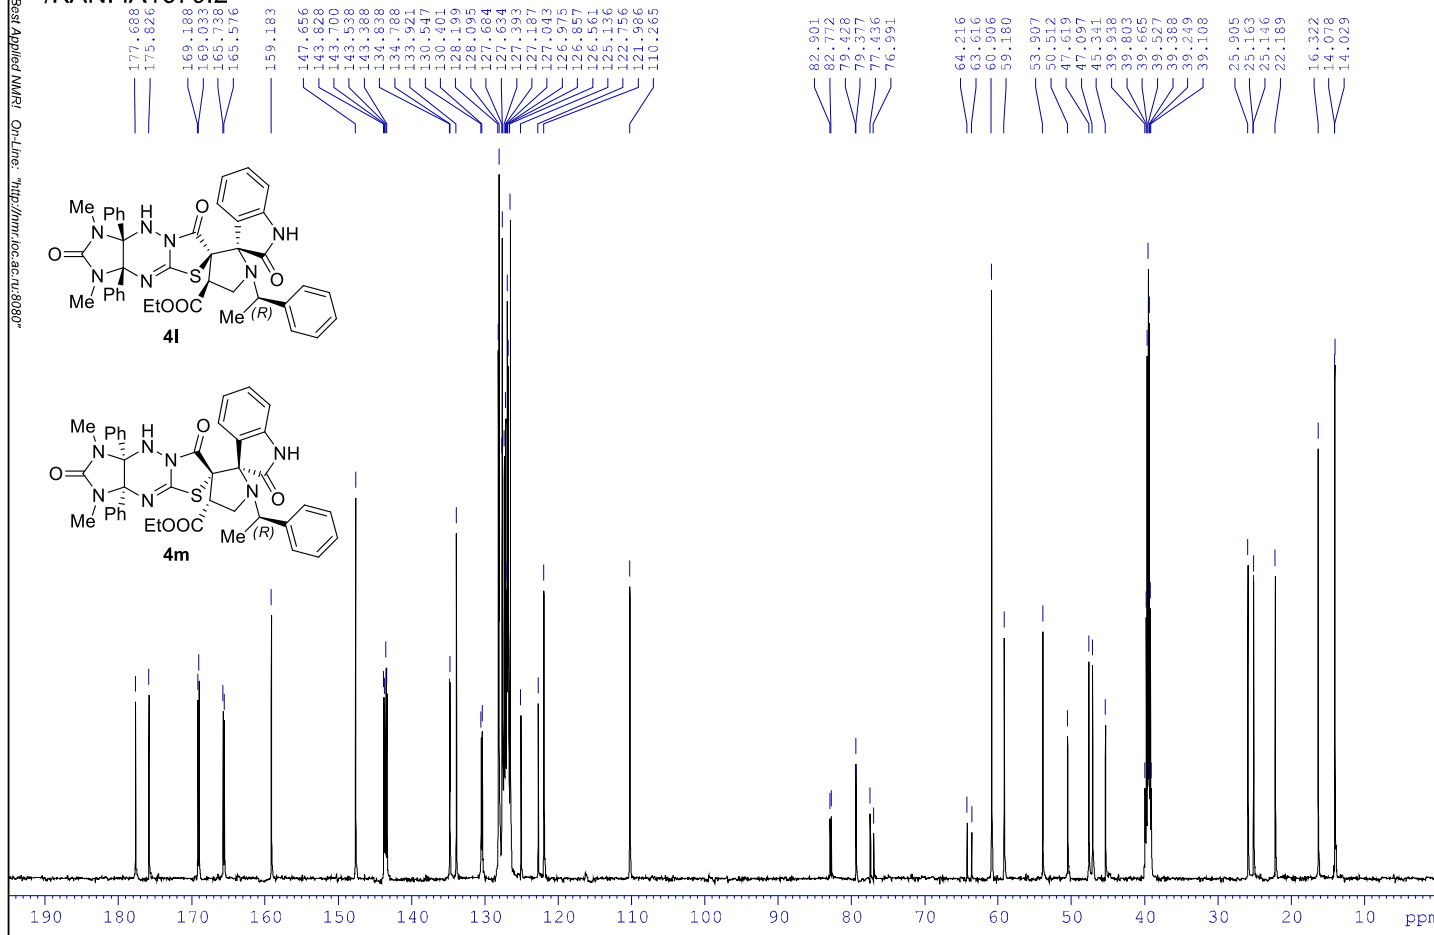

/KANI IA1763.2

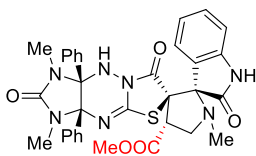

**5a**

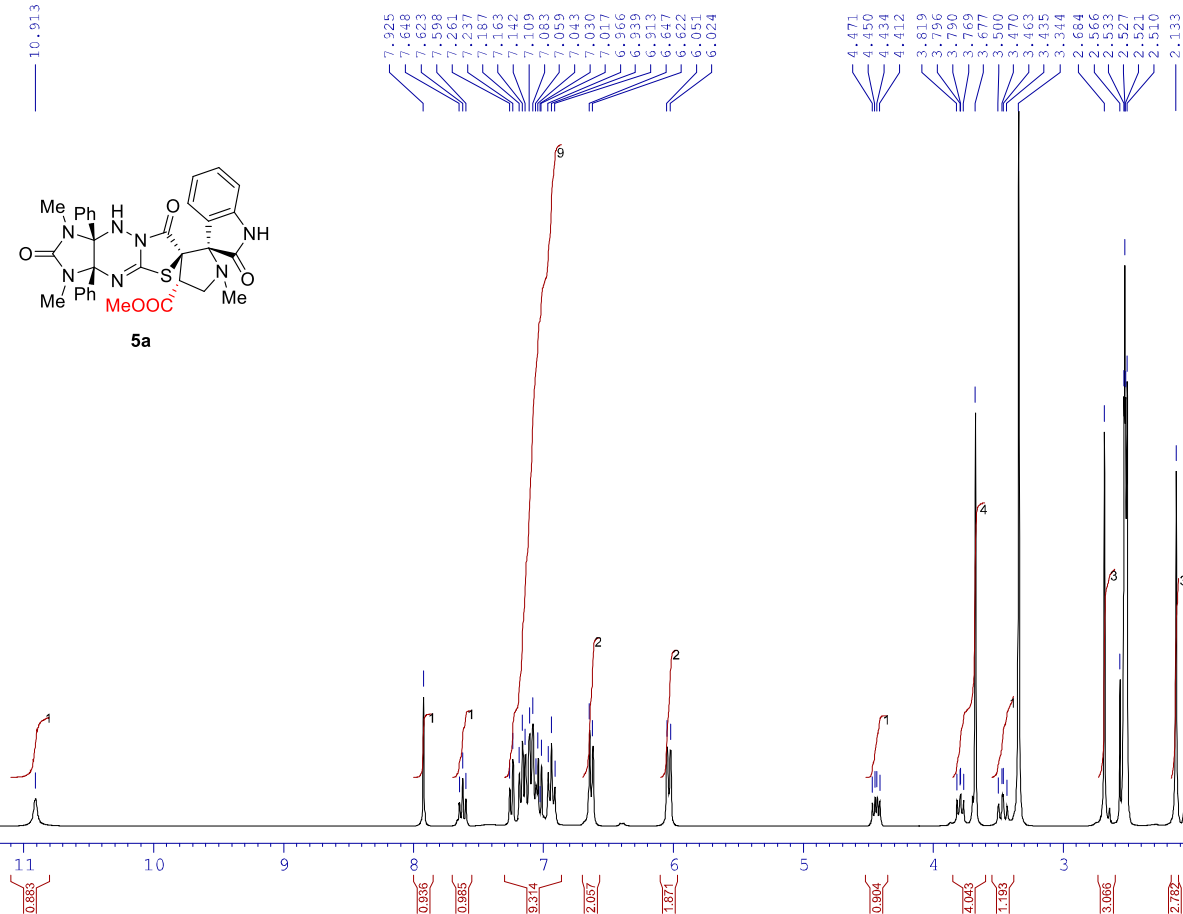

/KANI IA1763.1b

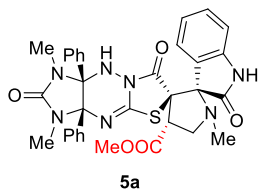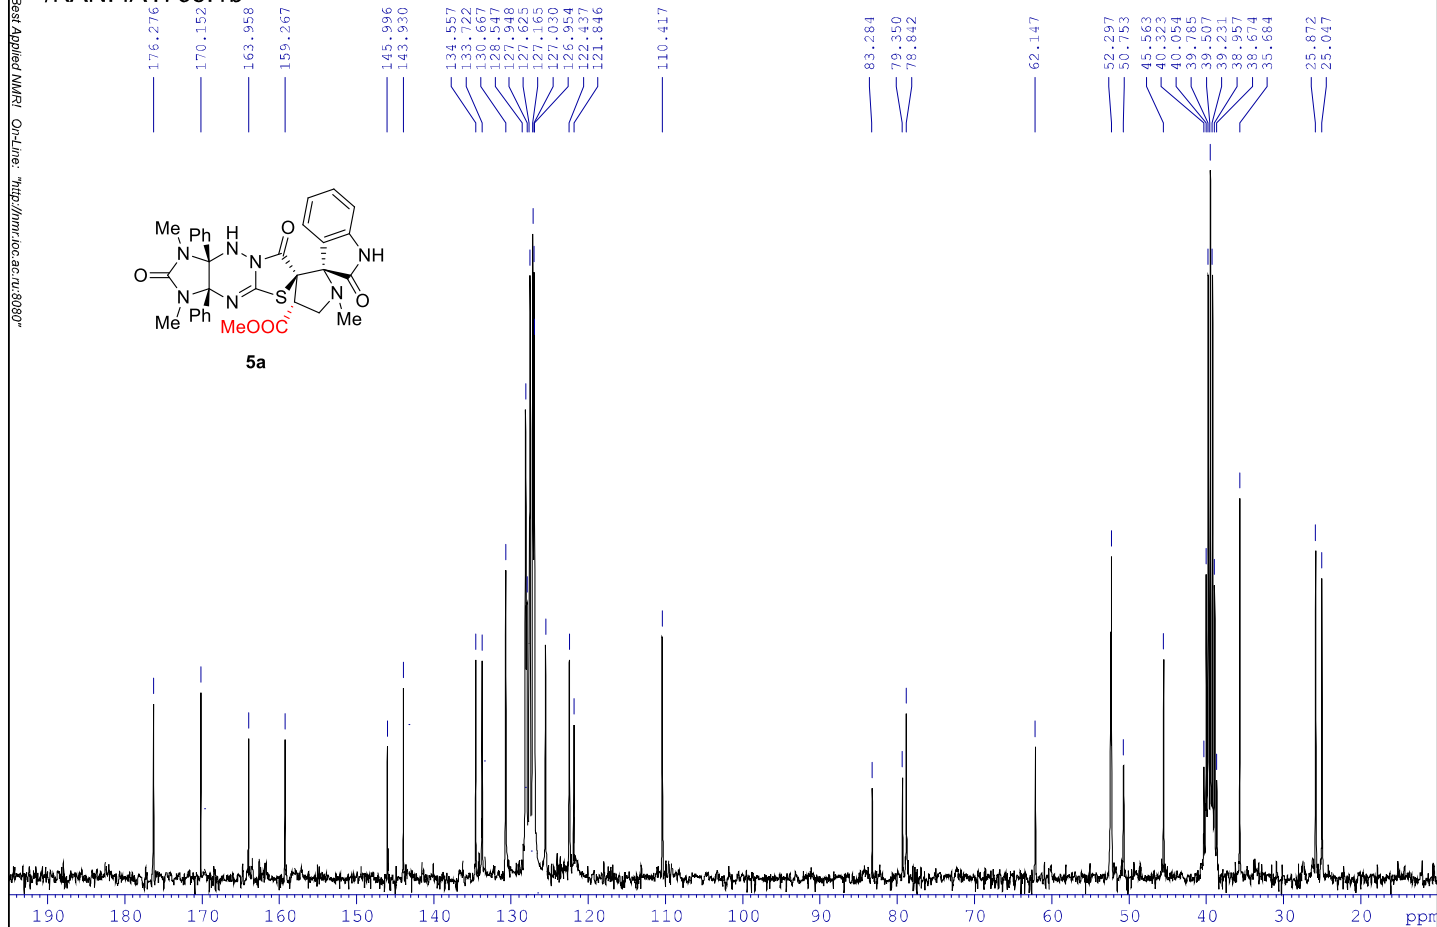

/KANI VDB468.1

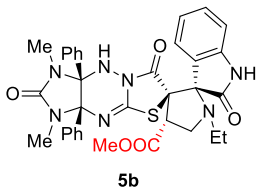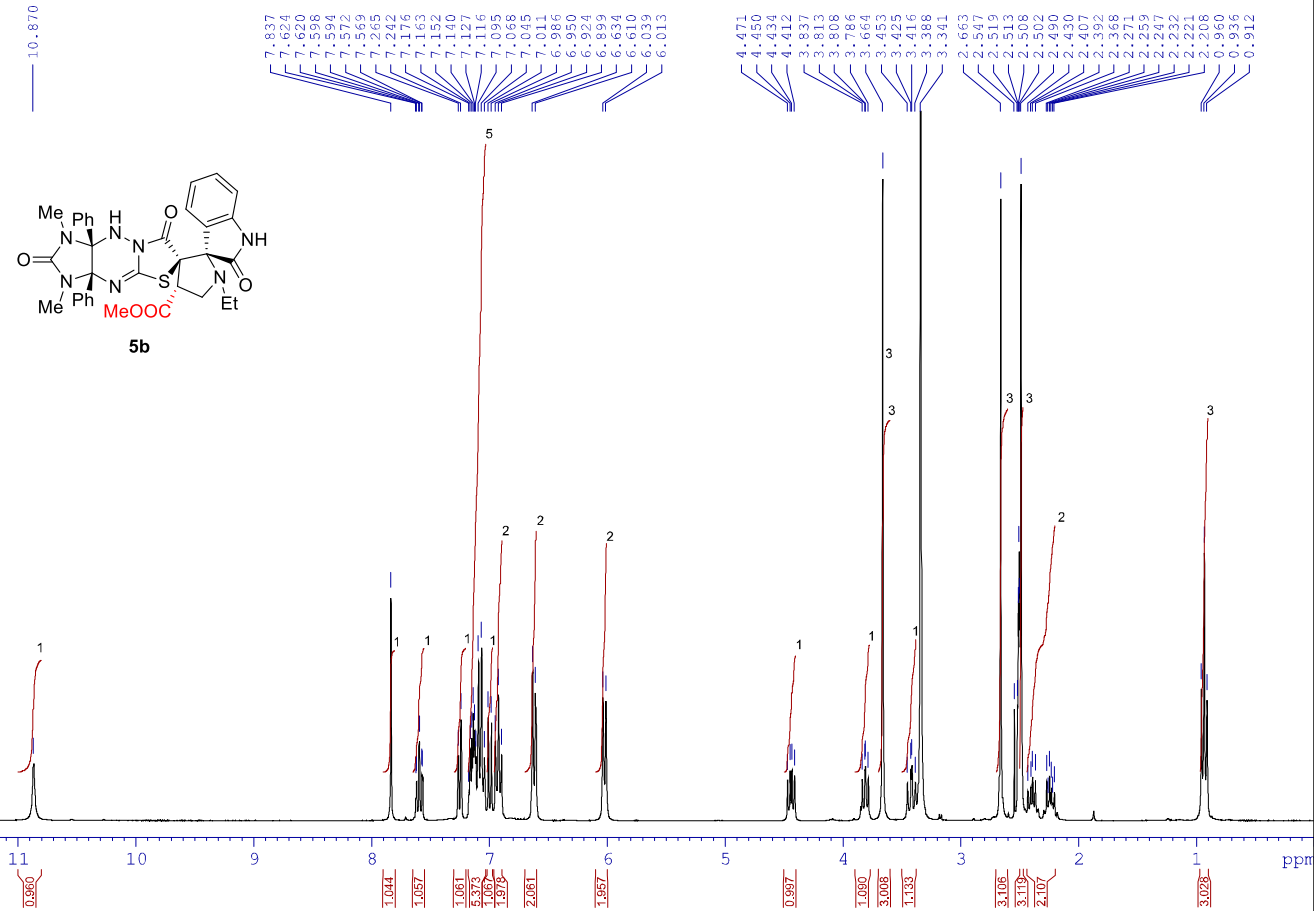

/KANI VDB90

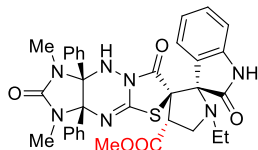

5b

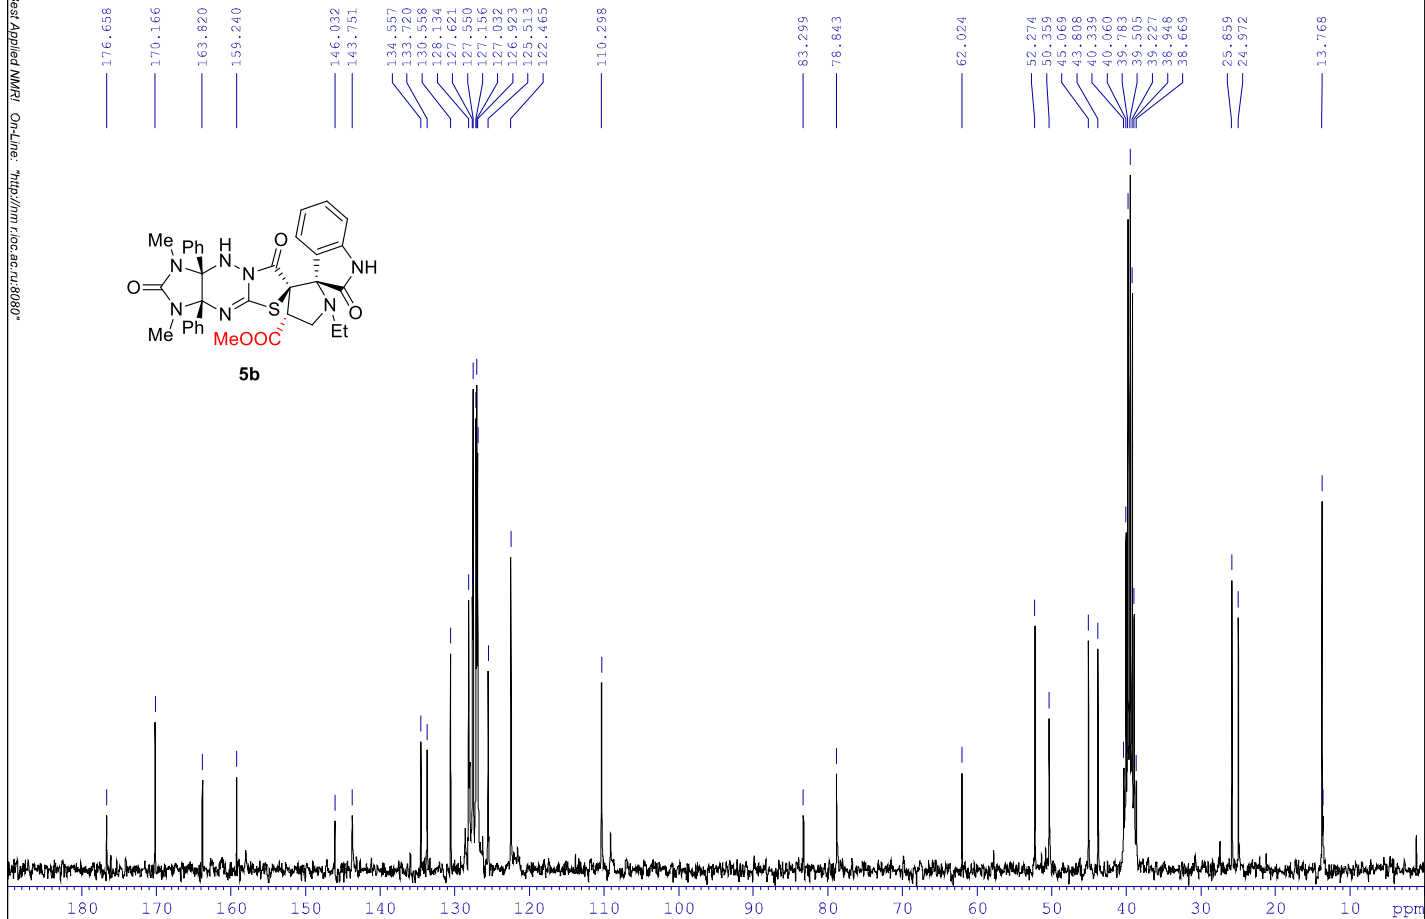

/KANI IA1592.1

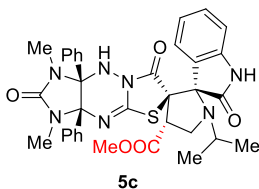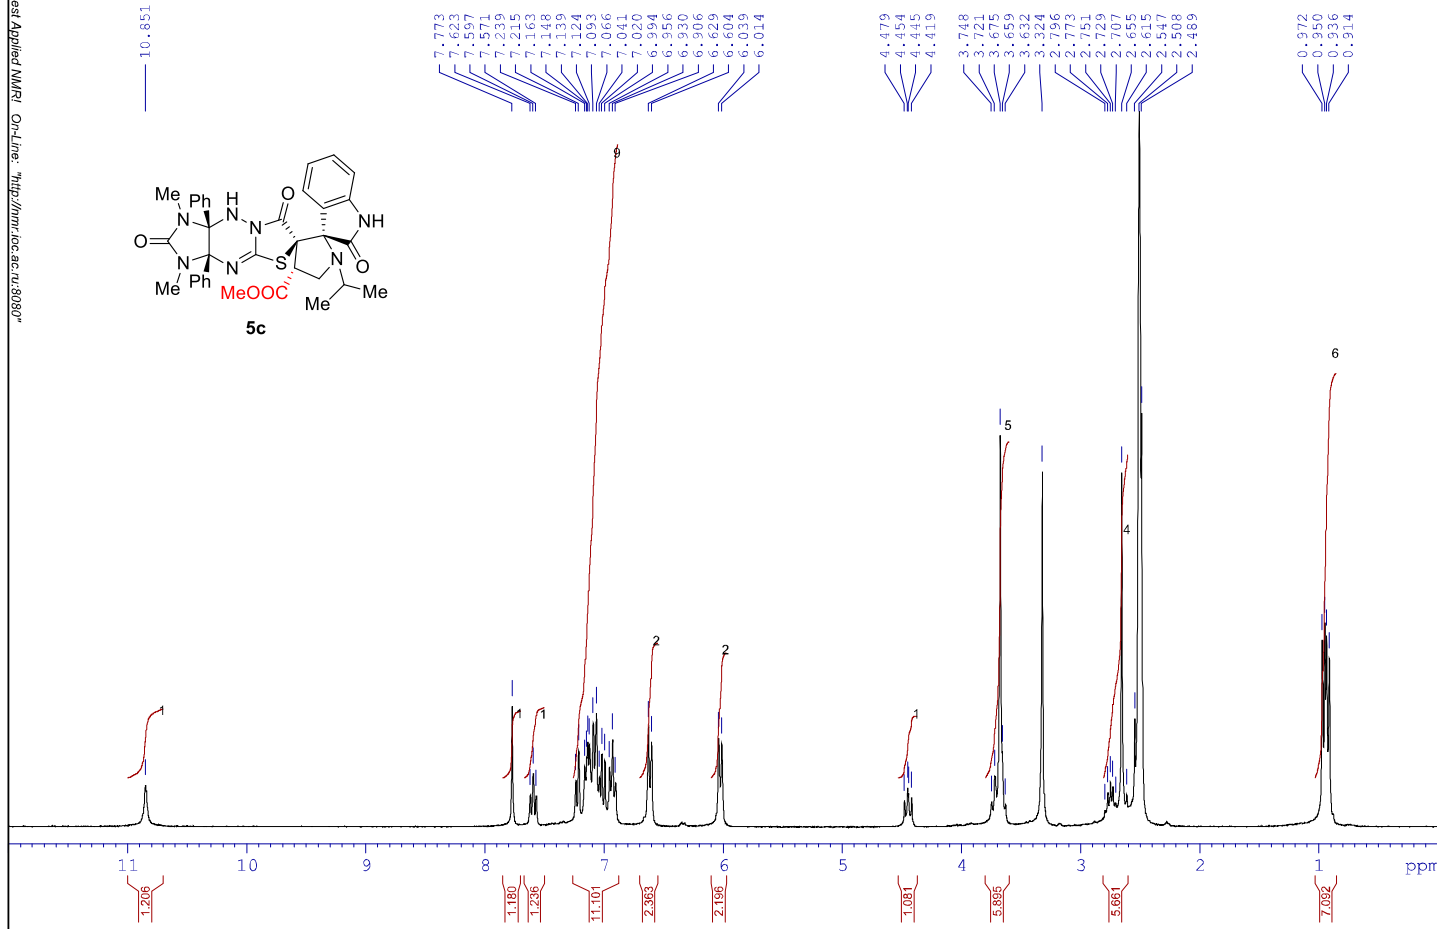



/KANI IA1592.2

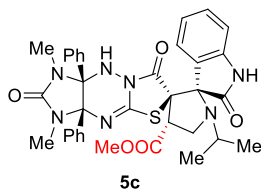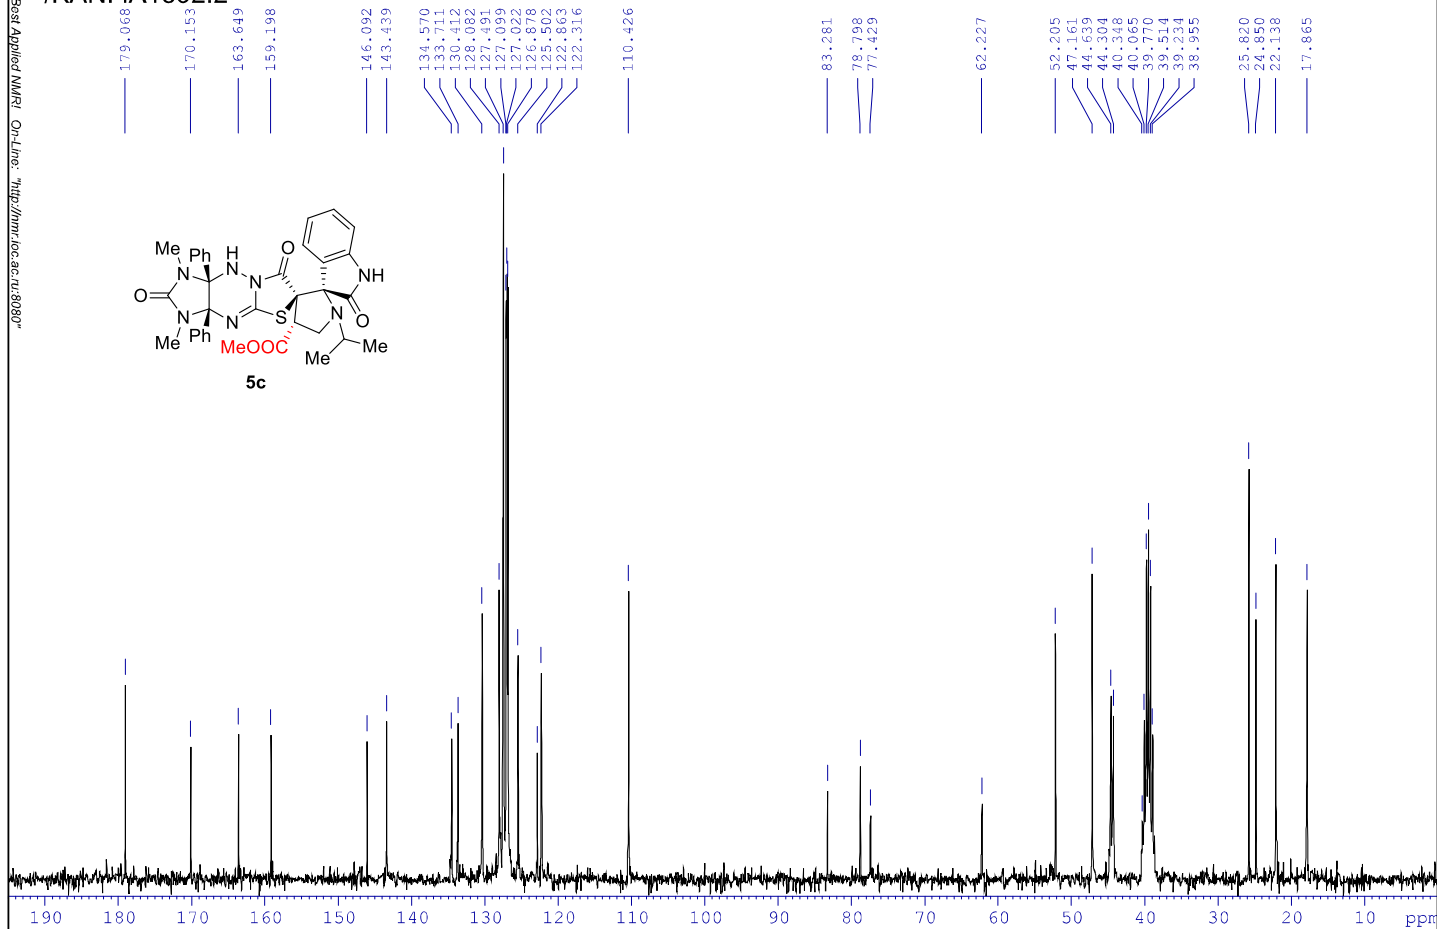

/KANI LEO7.1

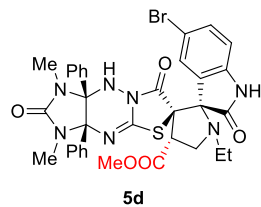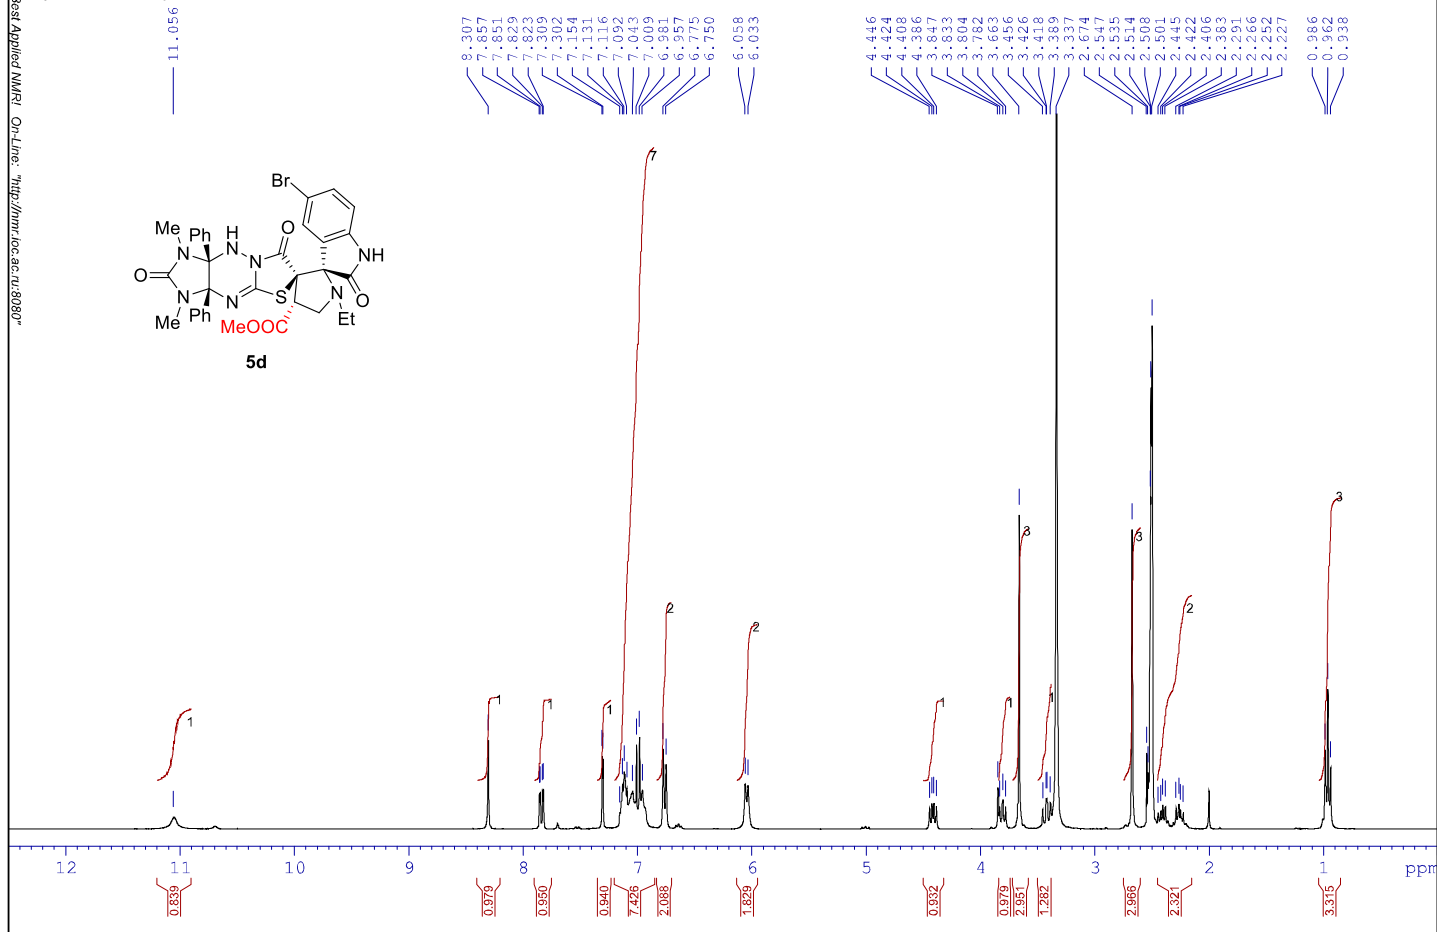

/KANI LE07.1

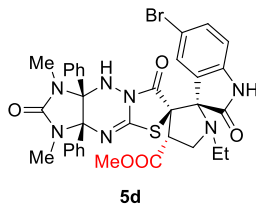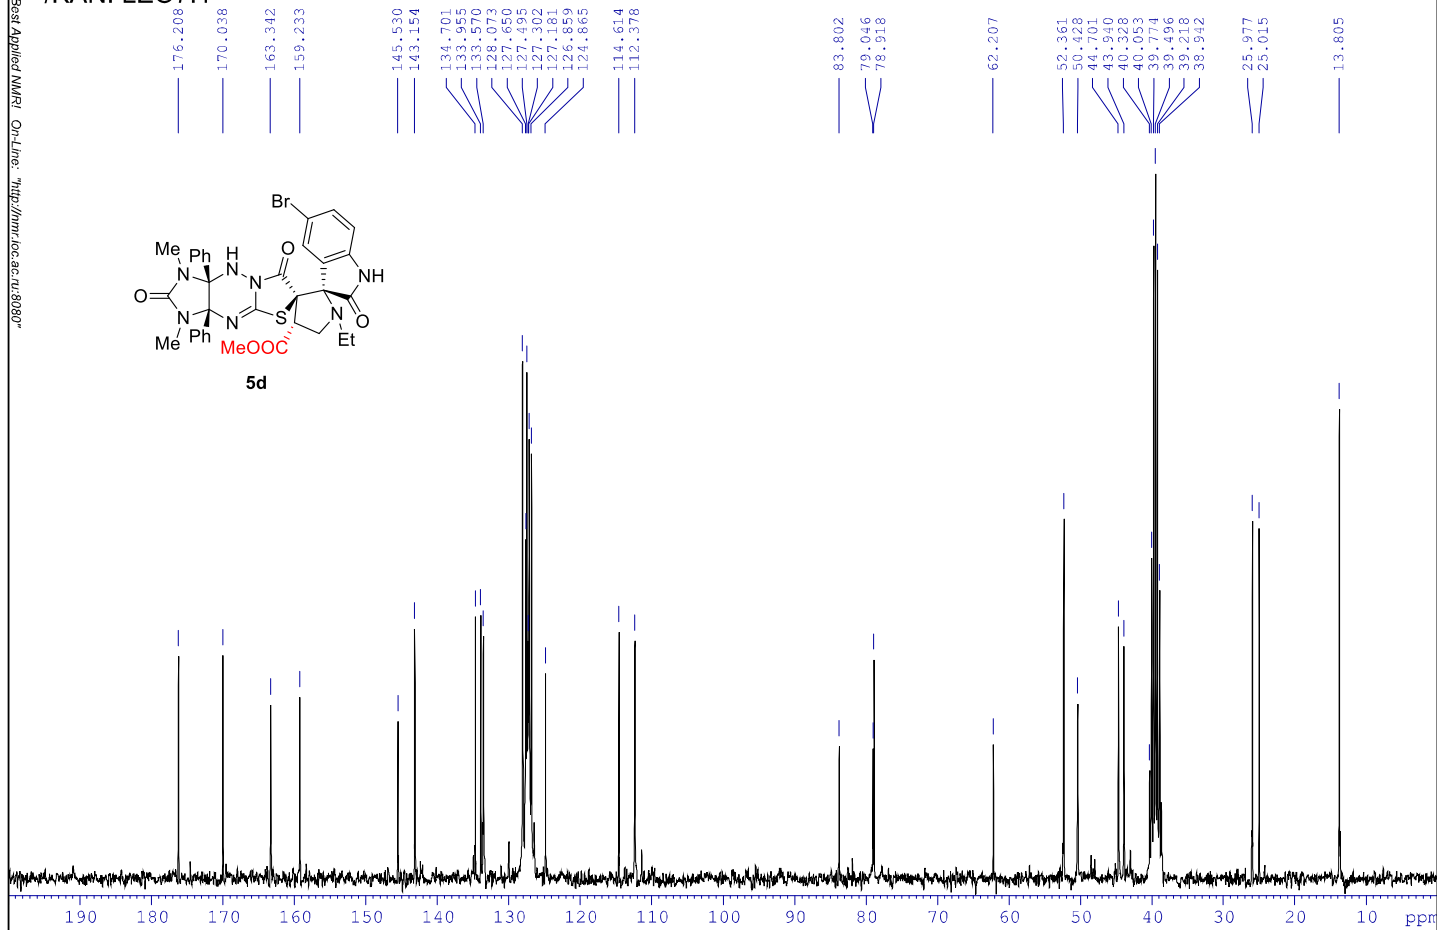

# /KANI VDB524.2

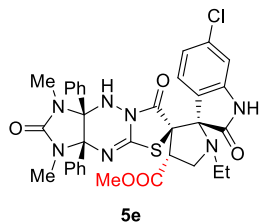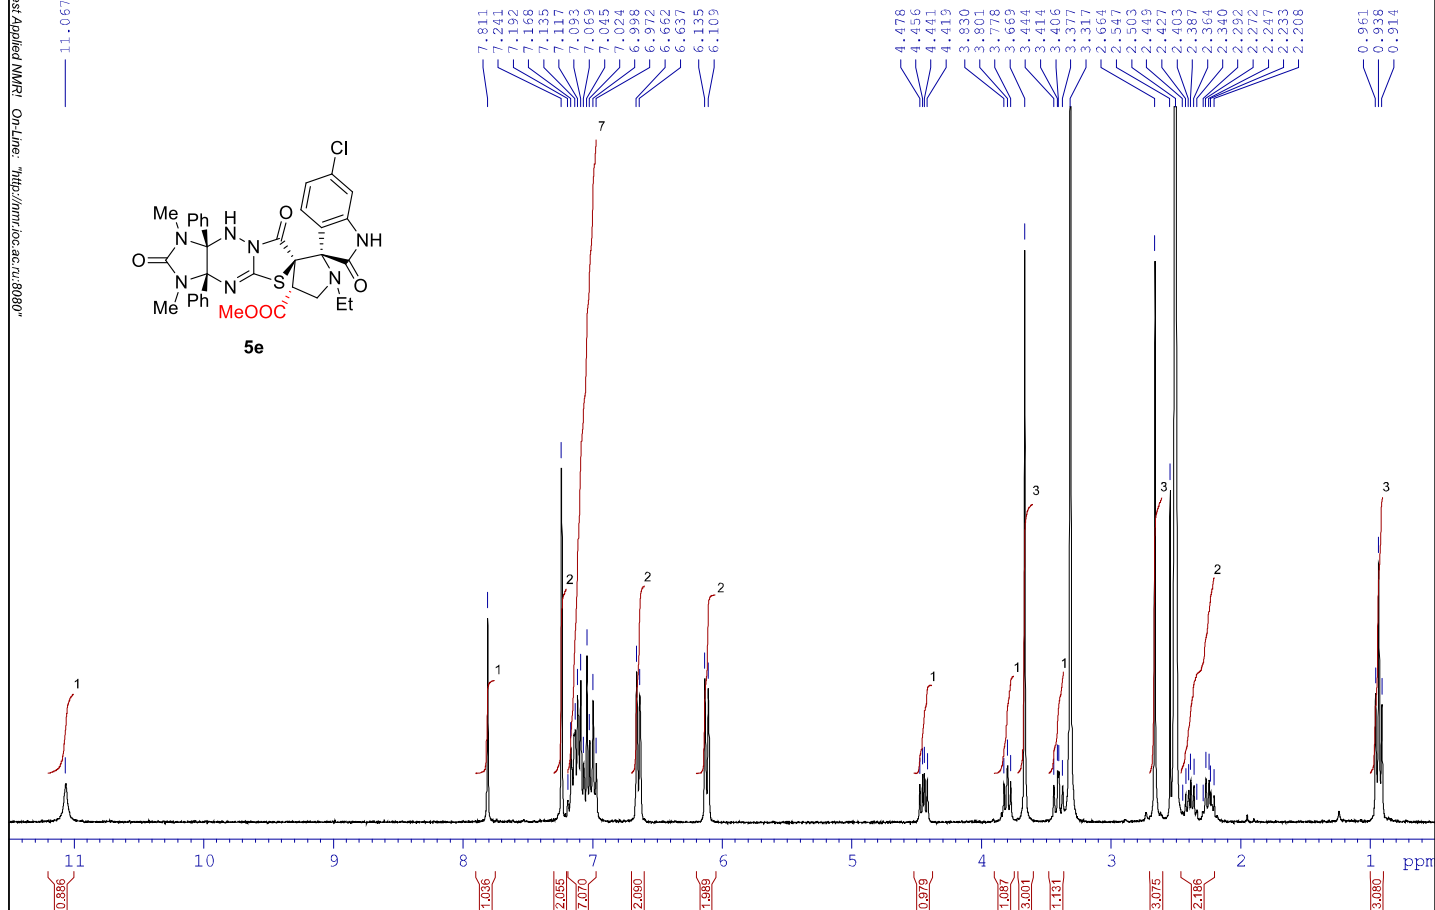

/KANI VDB524.2

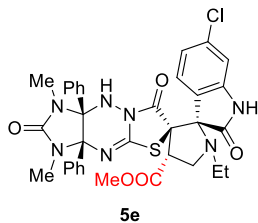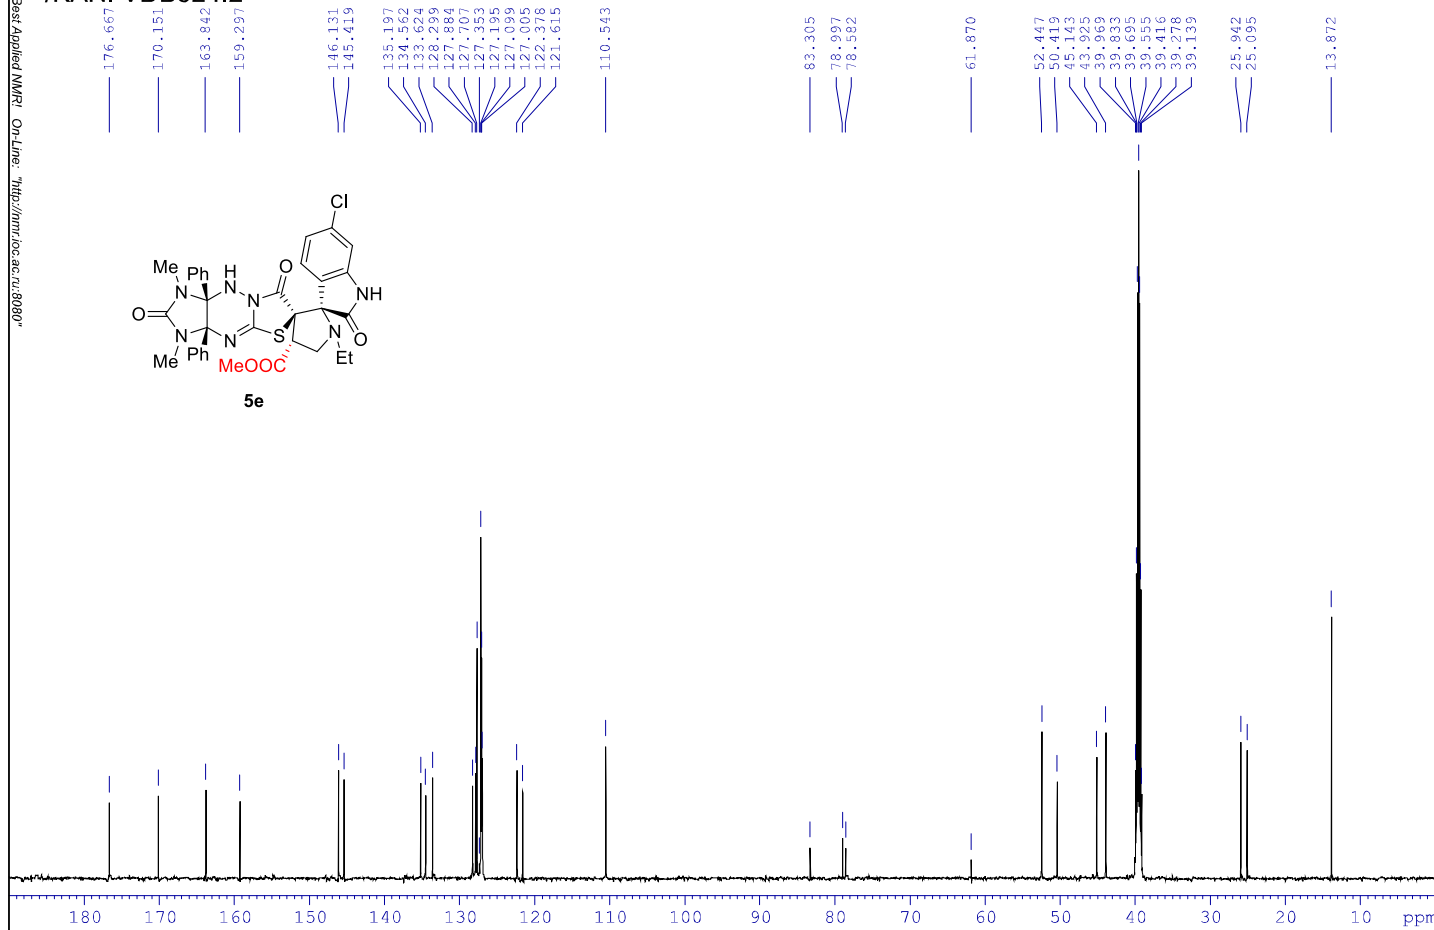

/KANI IA1579.4

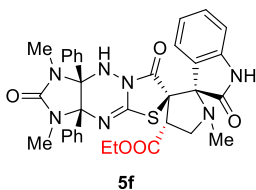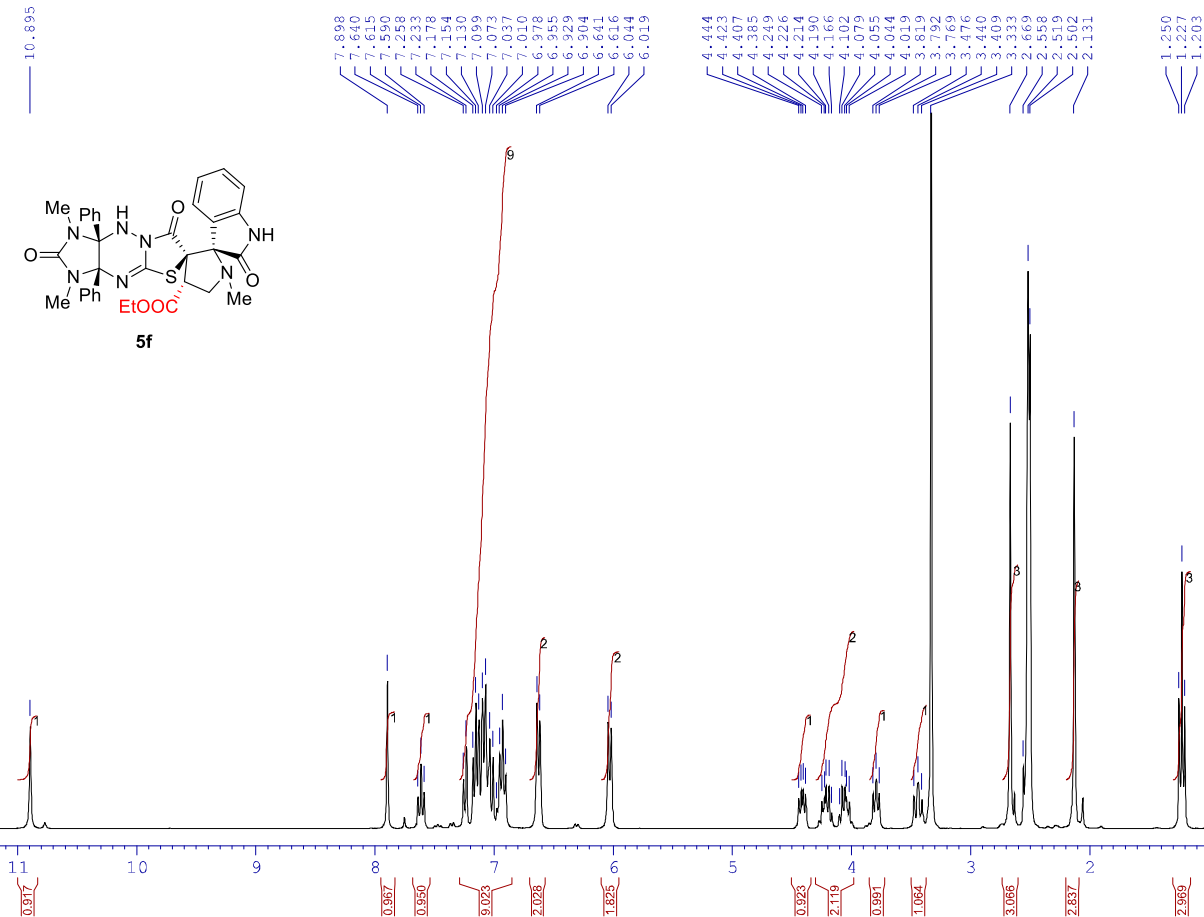

/KANI IA1579.4

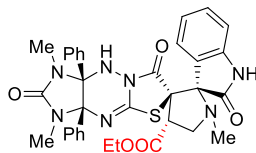

5f

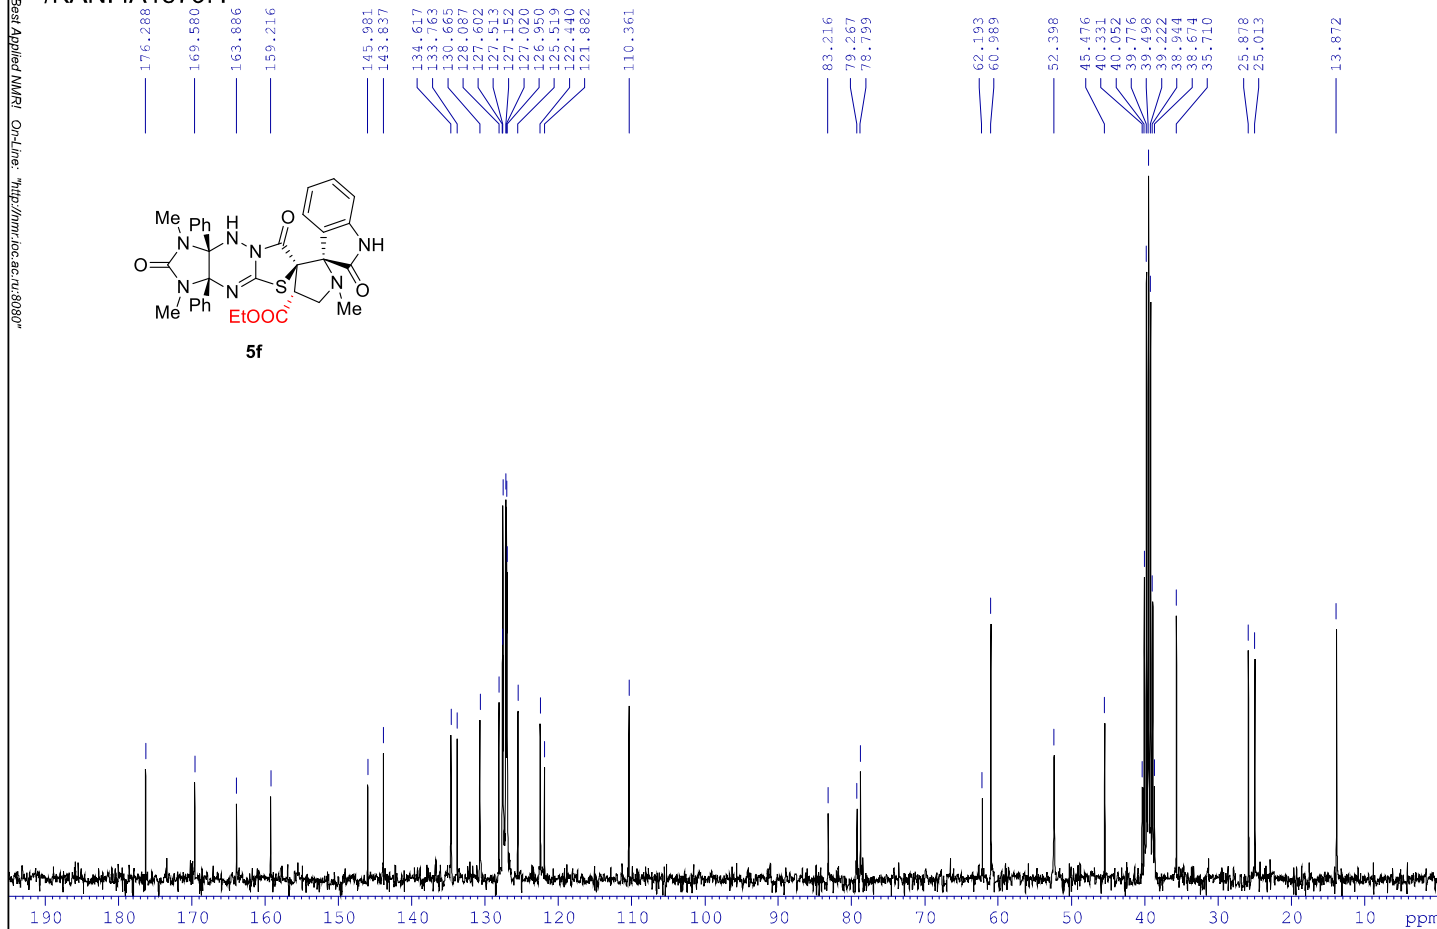

/KANI IA1587.3

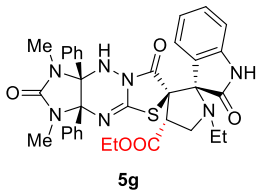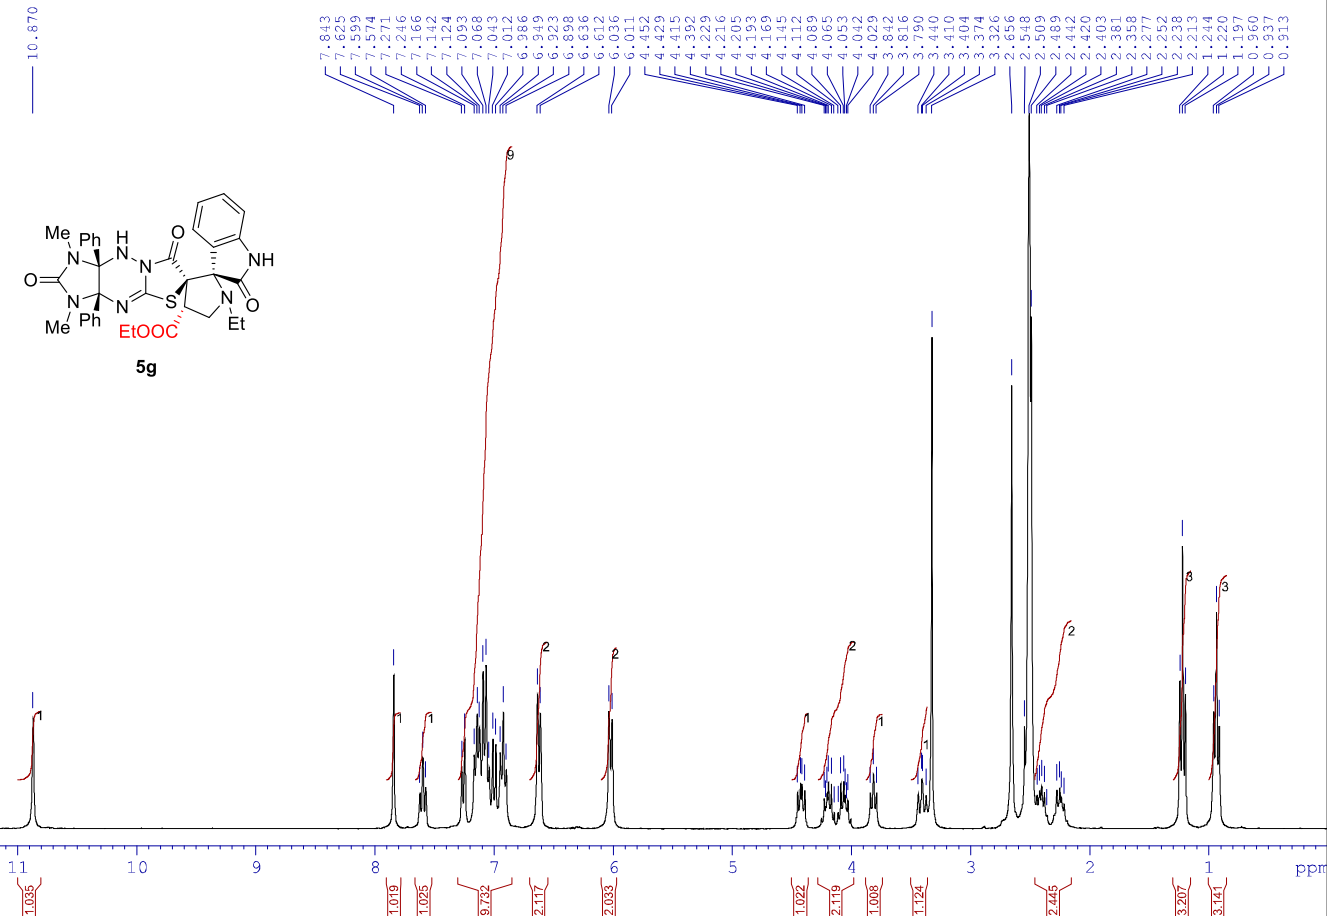



/KANI IA1587.1

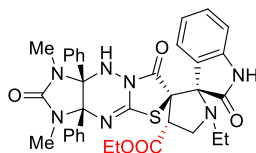

5g

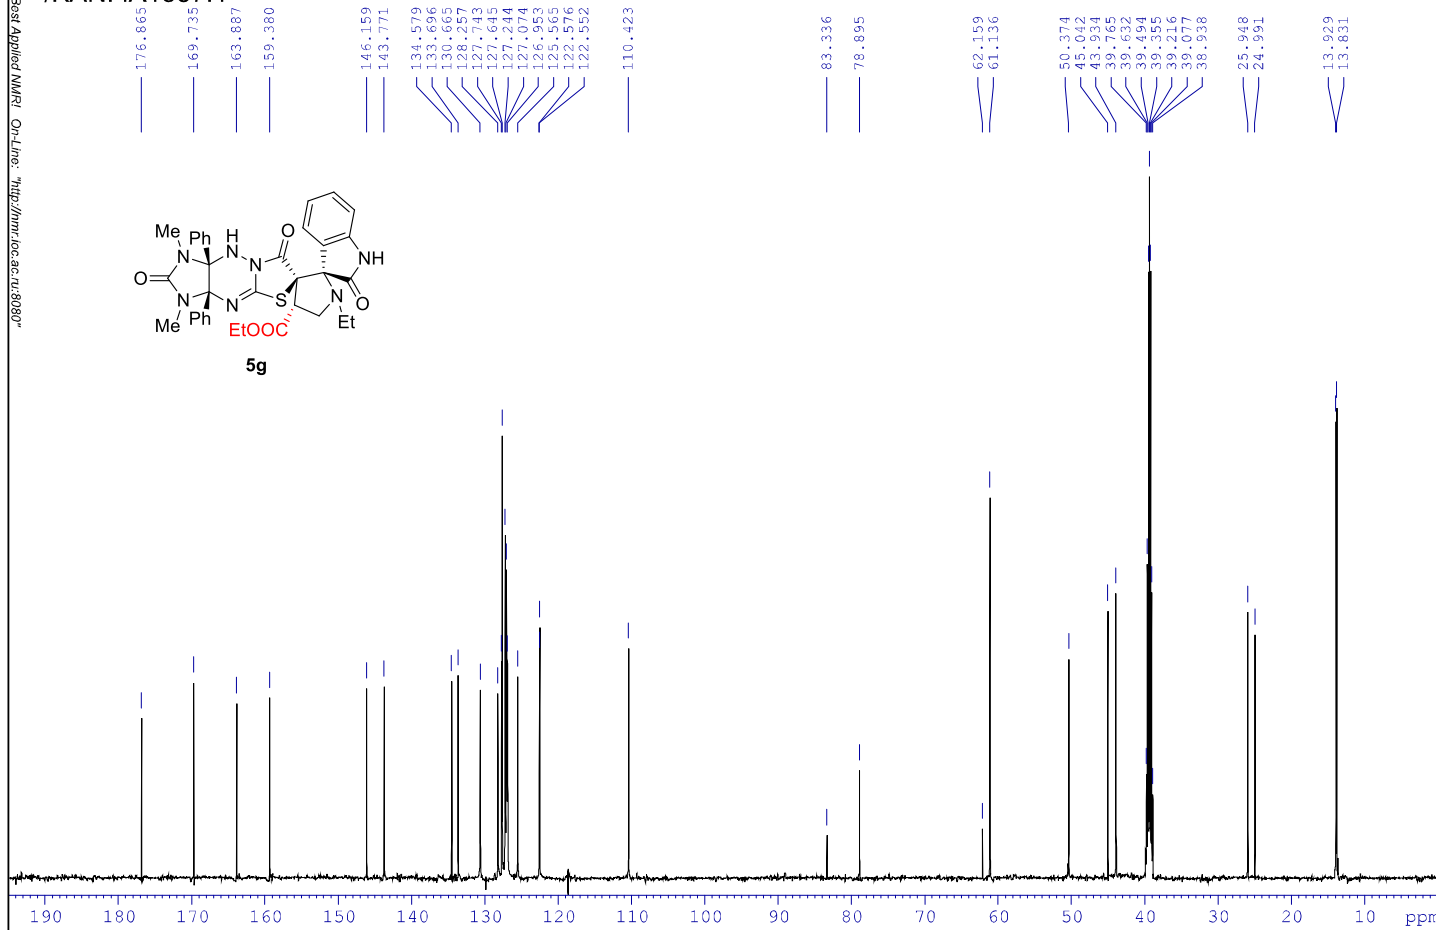

/KANI IA1591.1

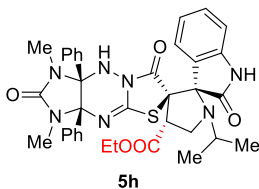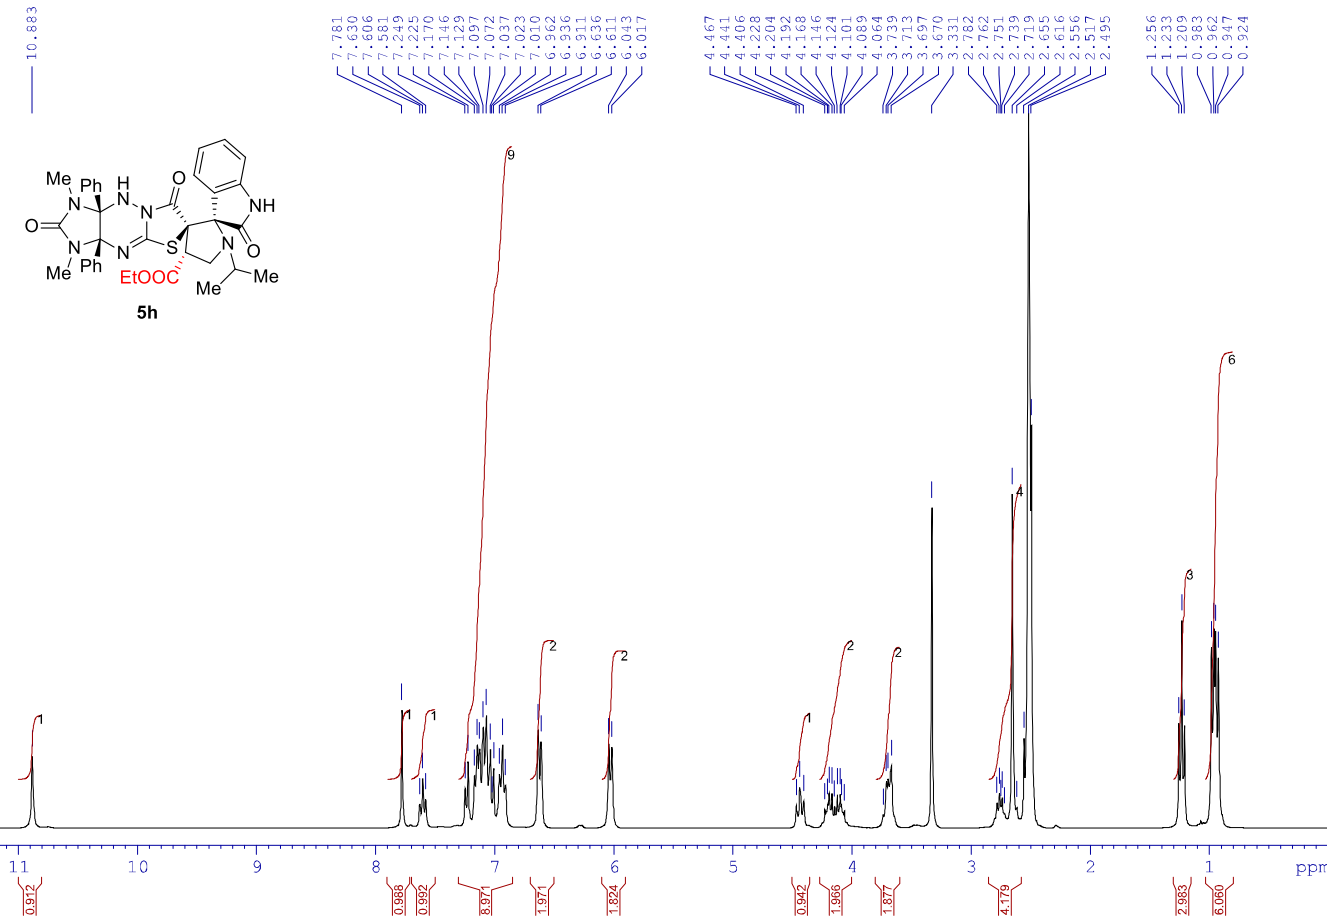

/KANI IA1591.1

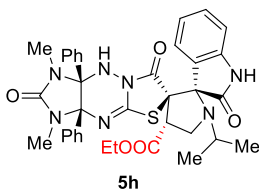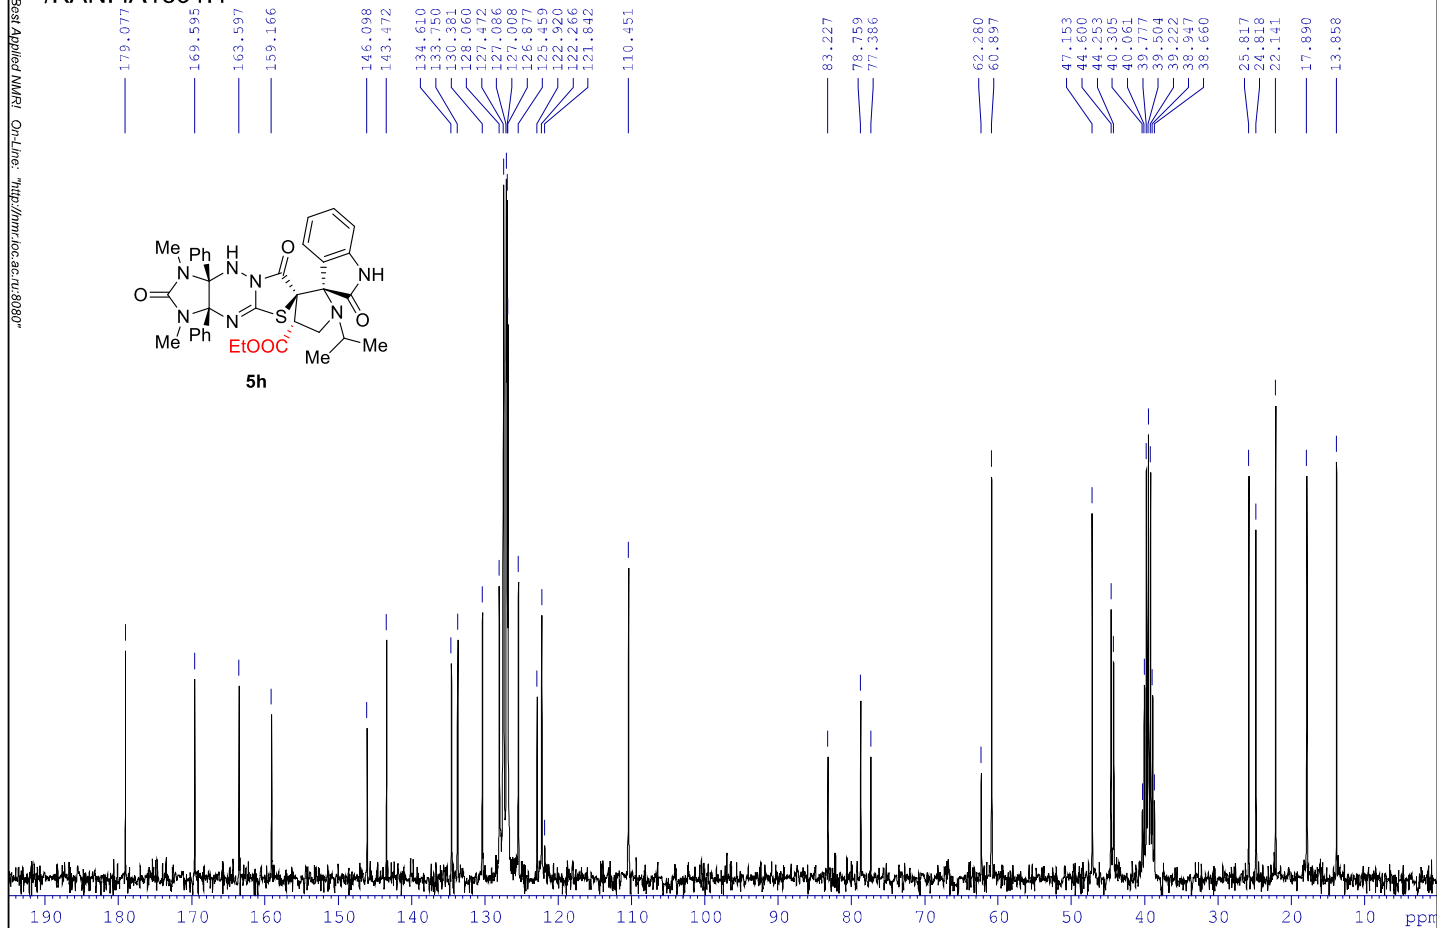

/KANI IA1612.2

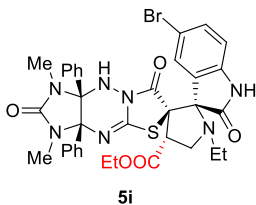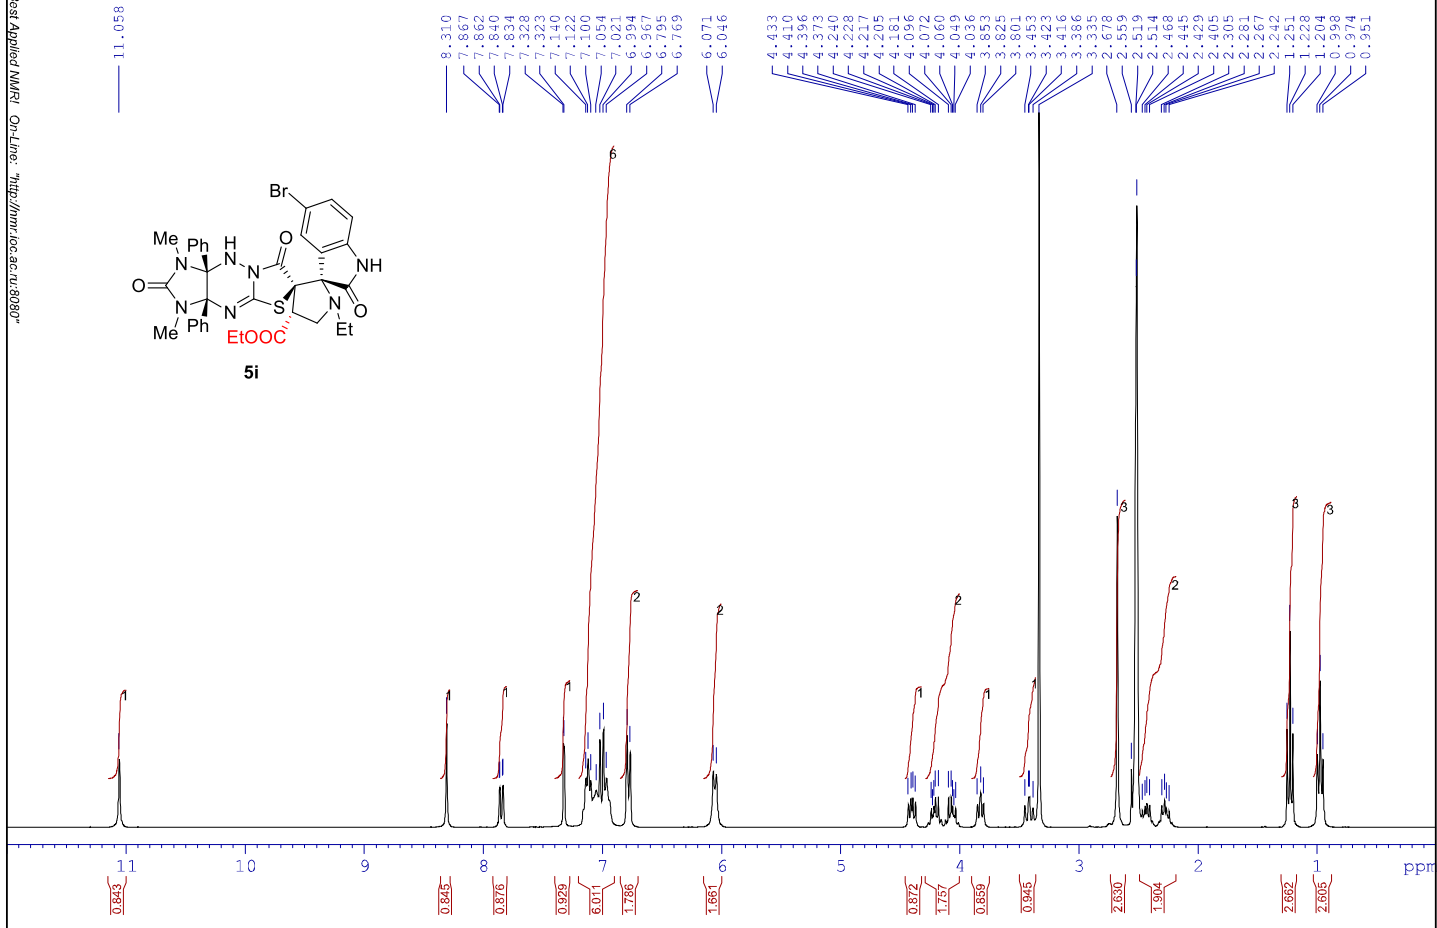

/KANI IA1612.2

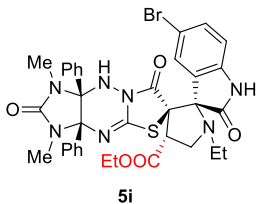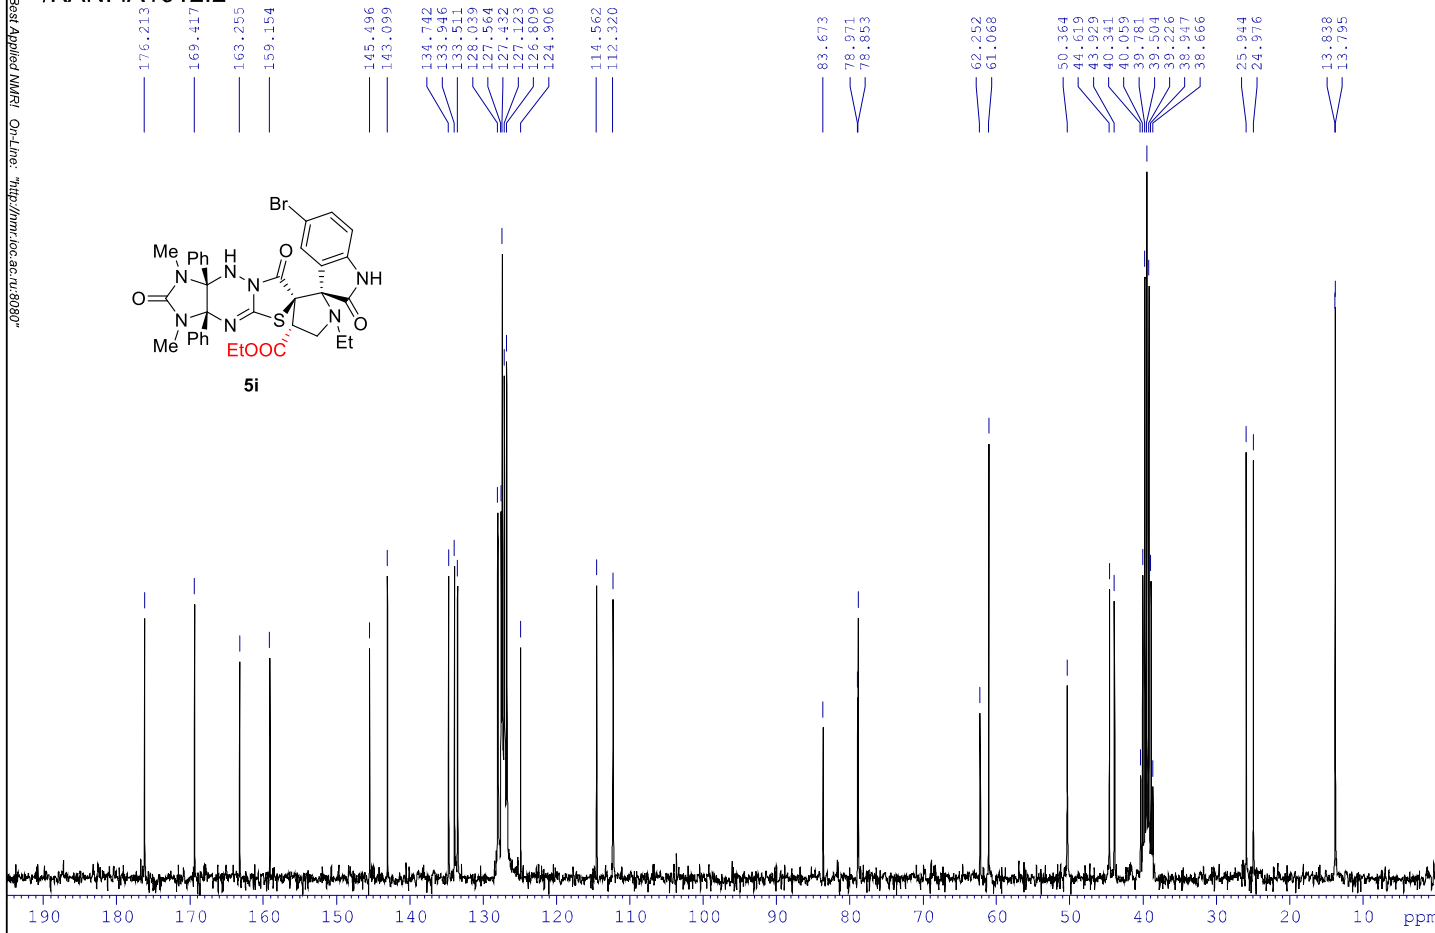

/KANI IA1645.1

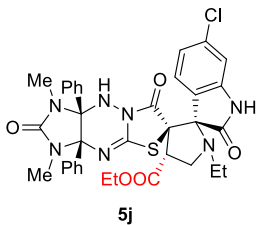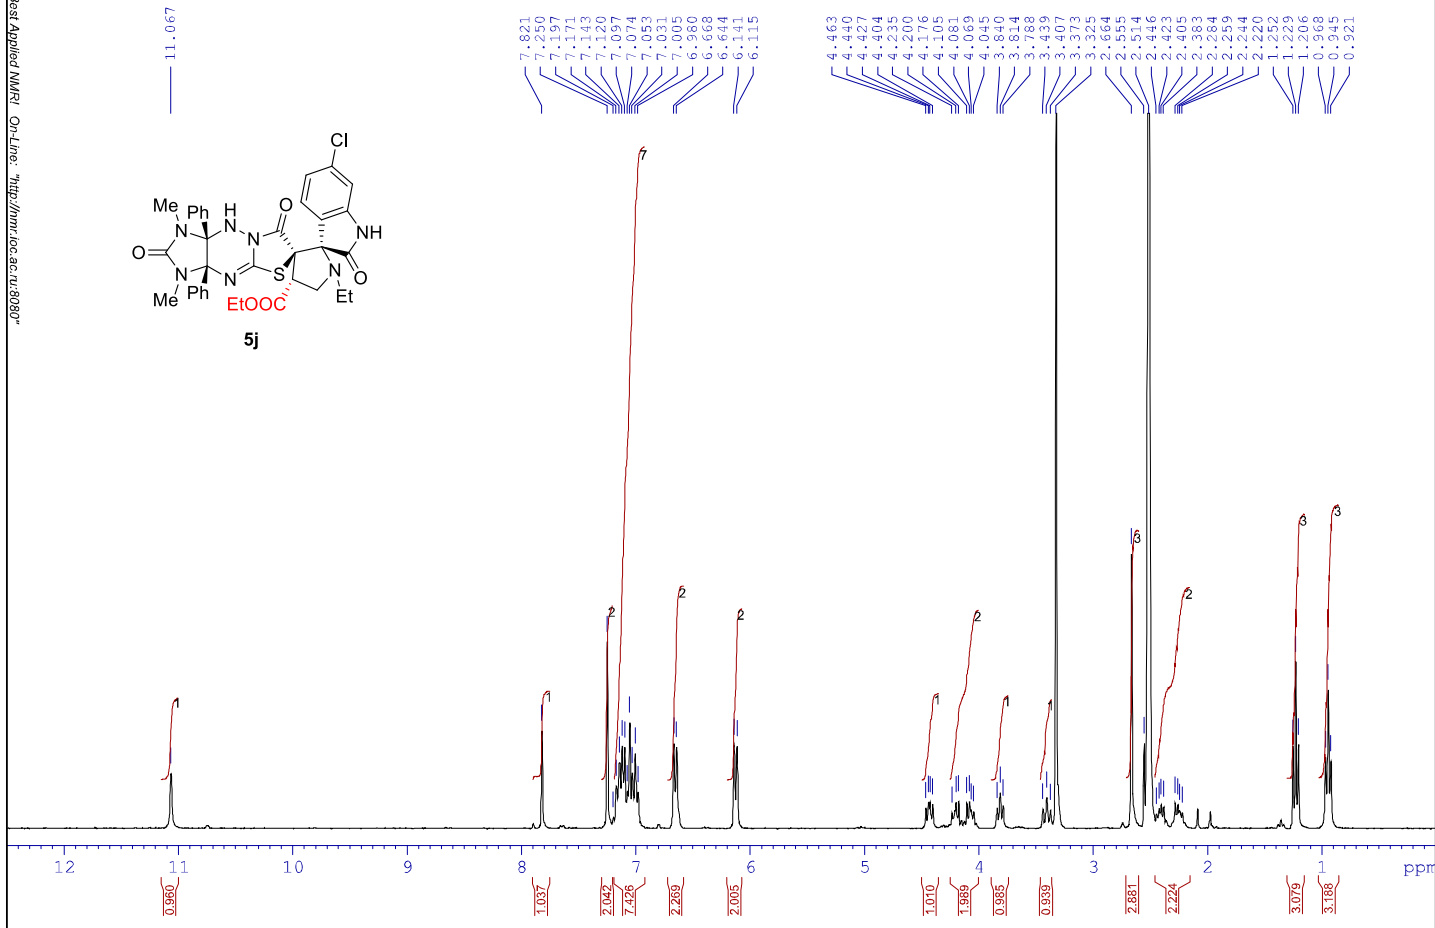

/KANI IA1645.1

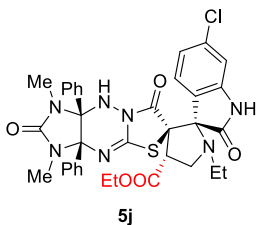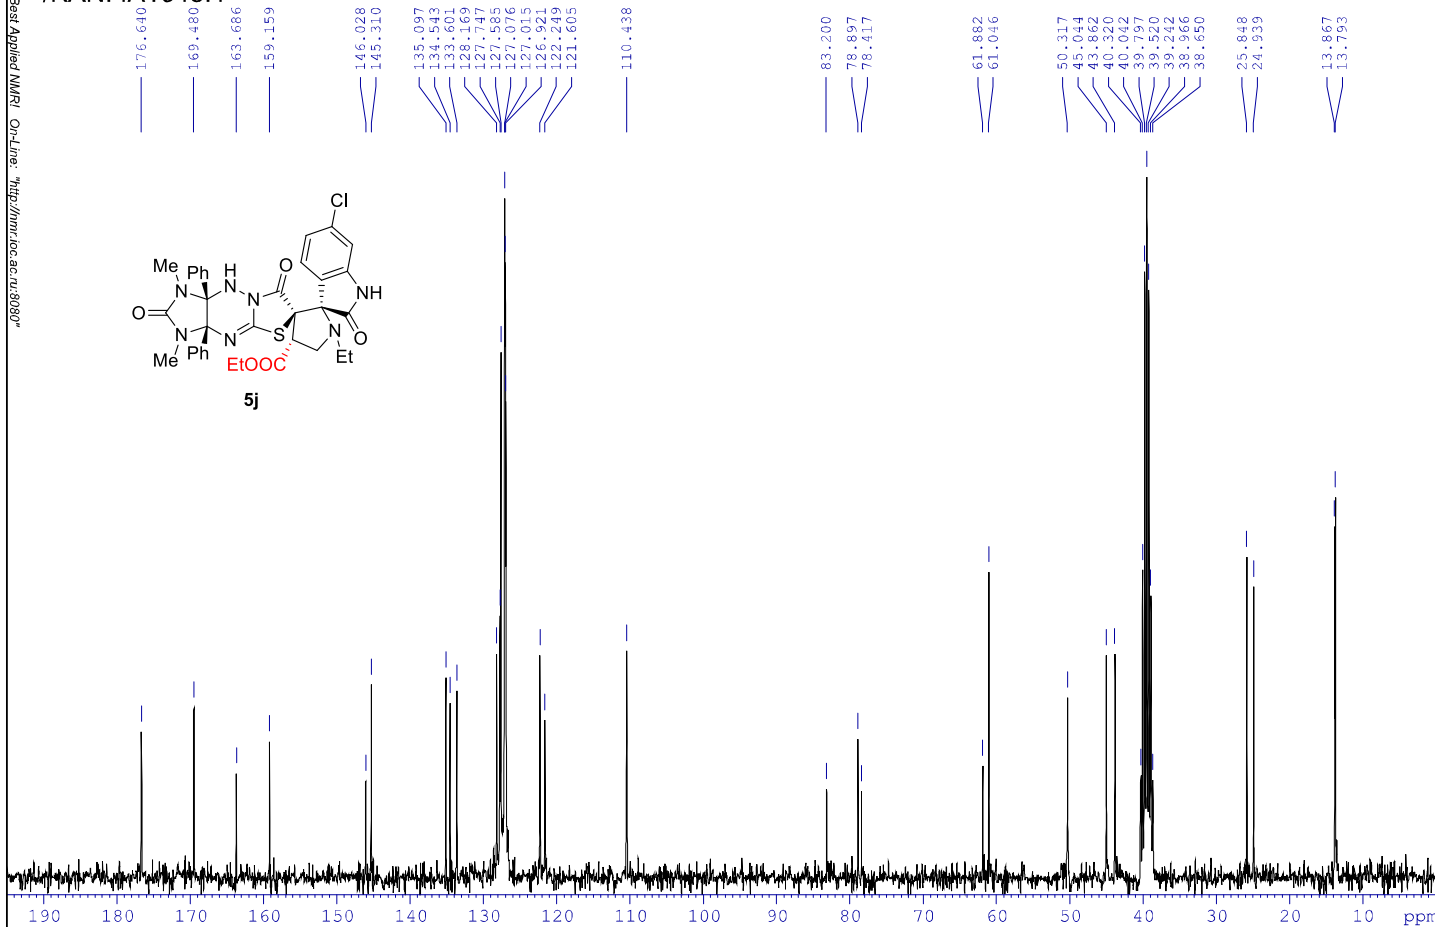

/KANI IA1595.1

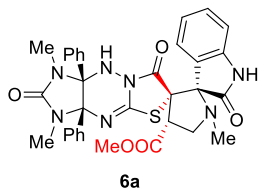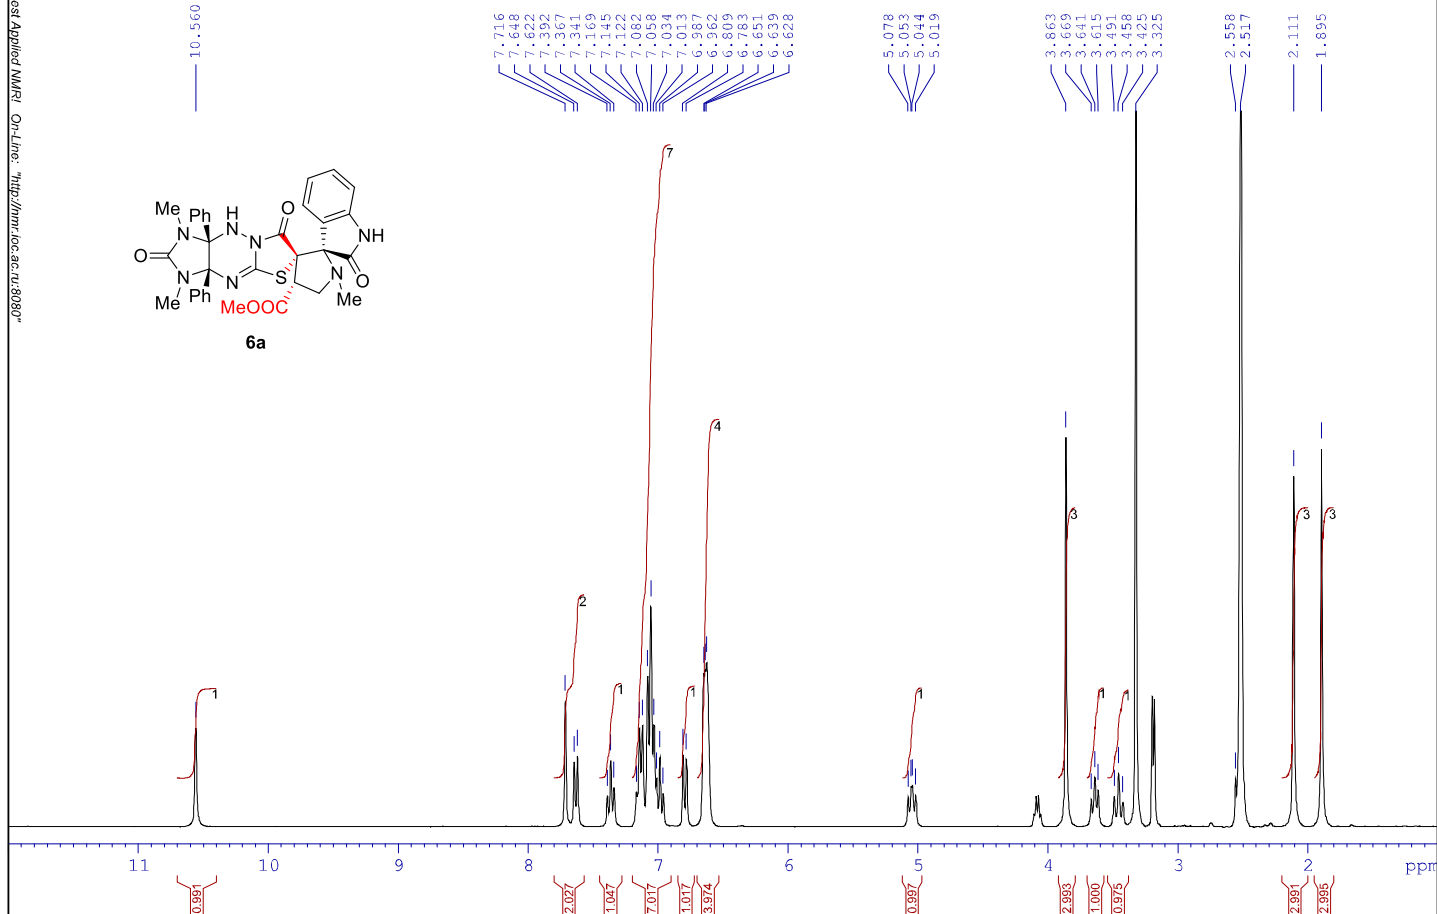



/KANI IA1595.1

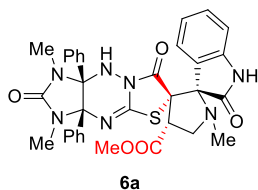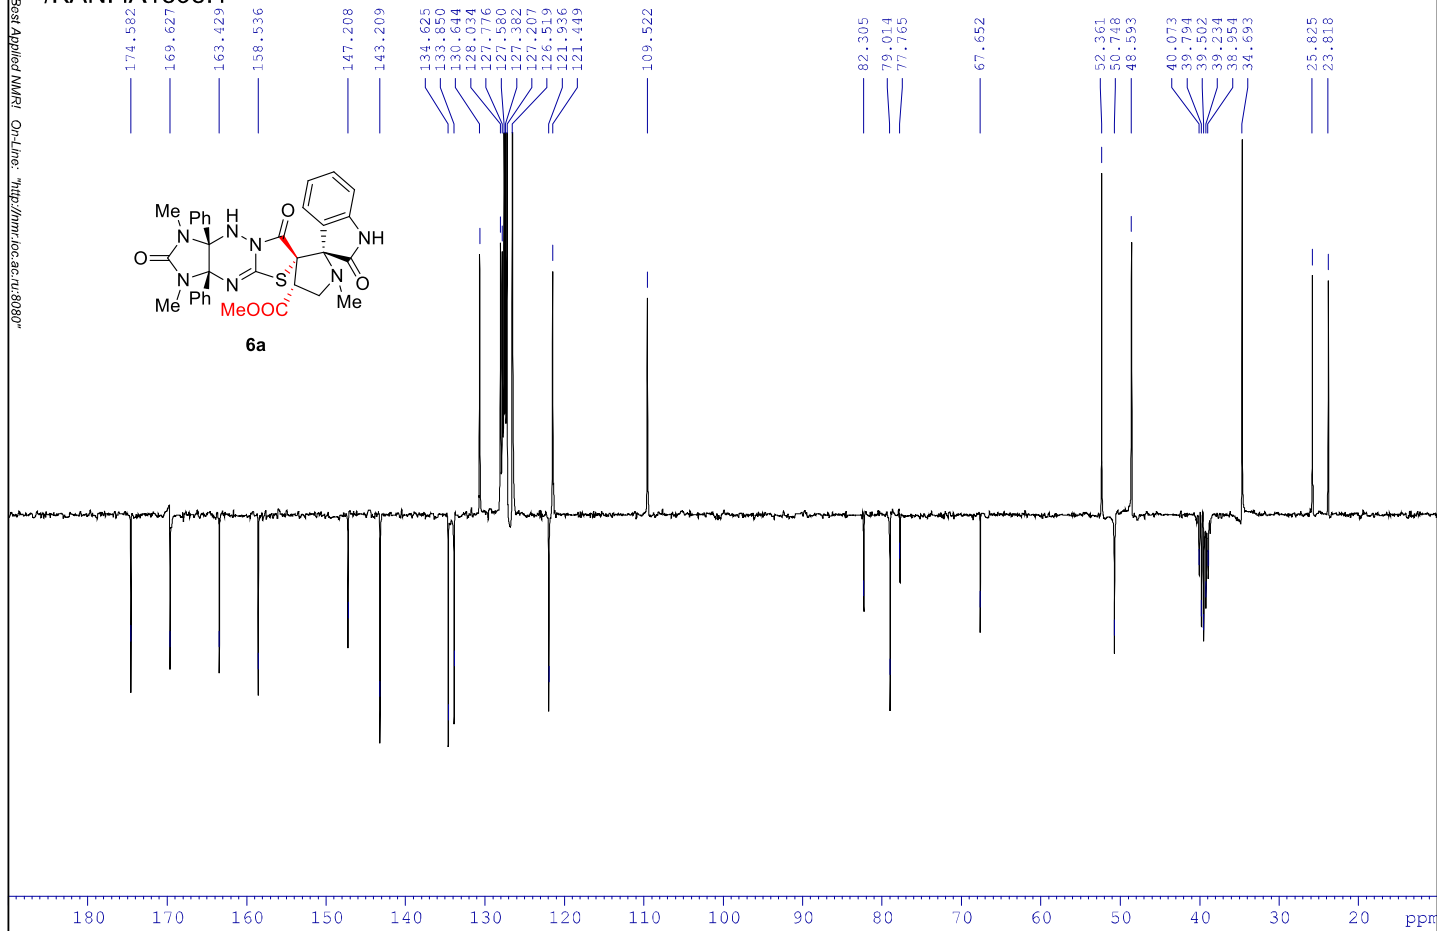

/KANI IA1756.2

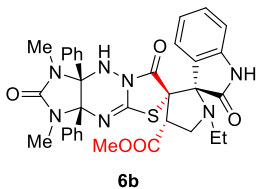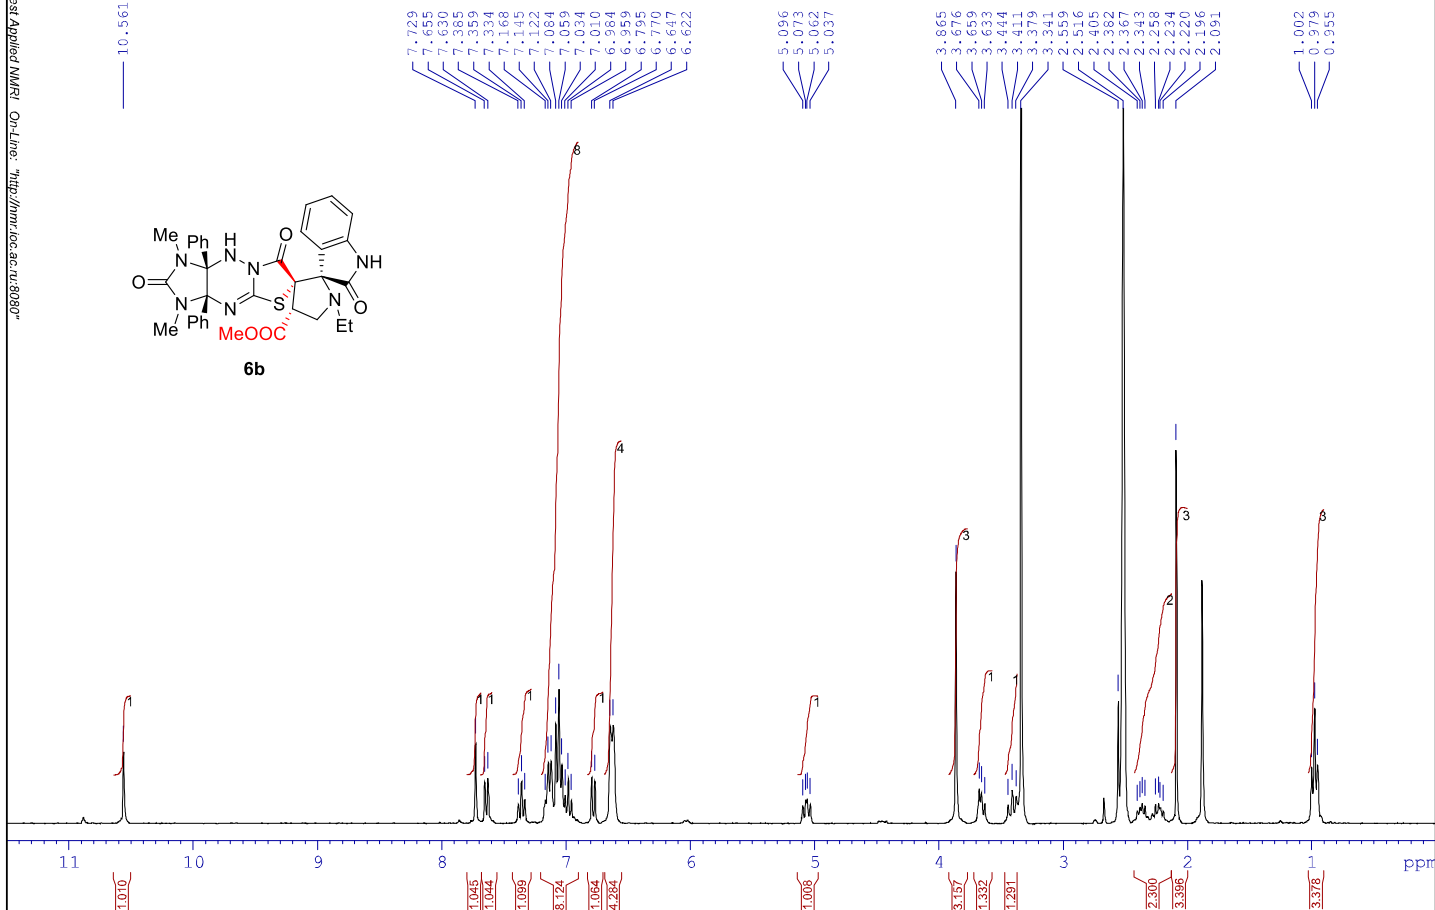

/KANI IA1756.2

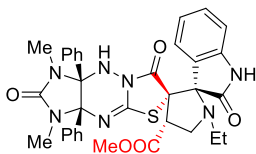

**6b**

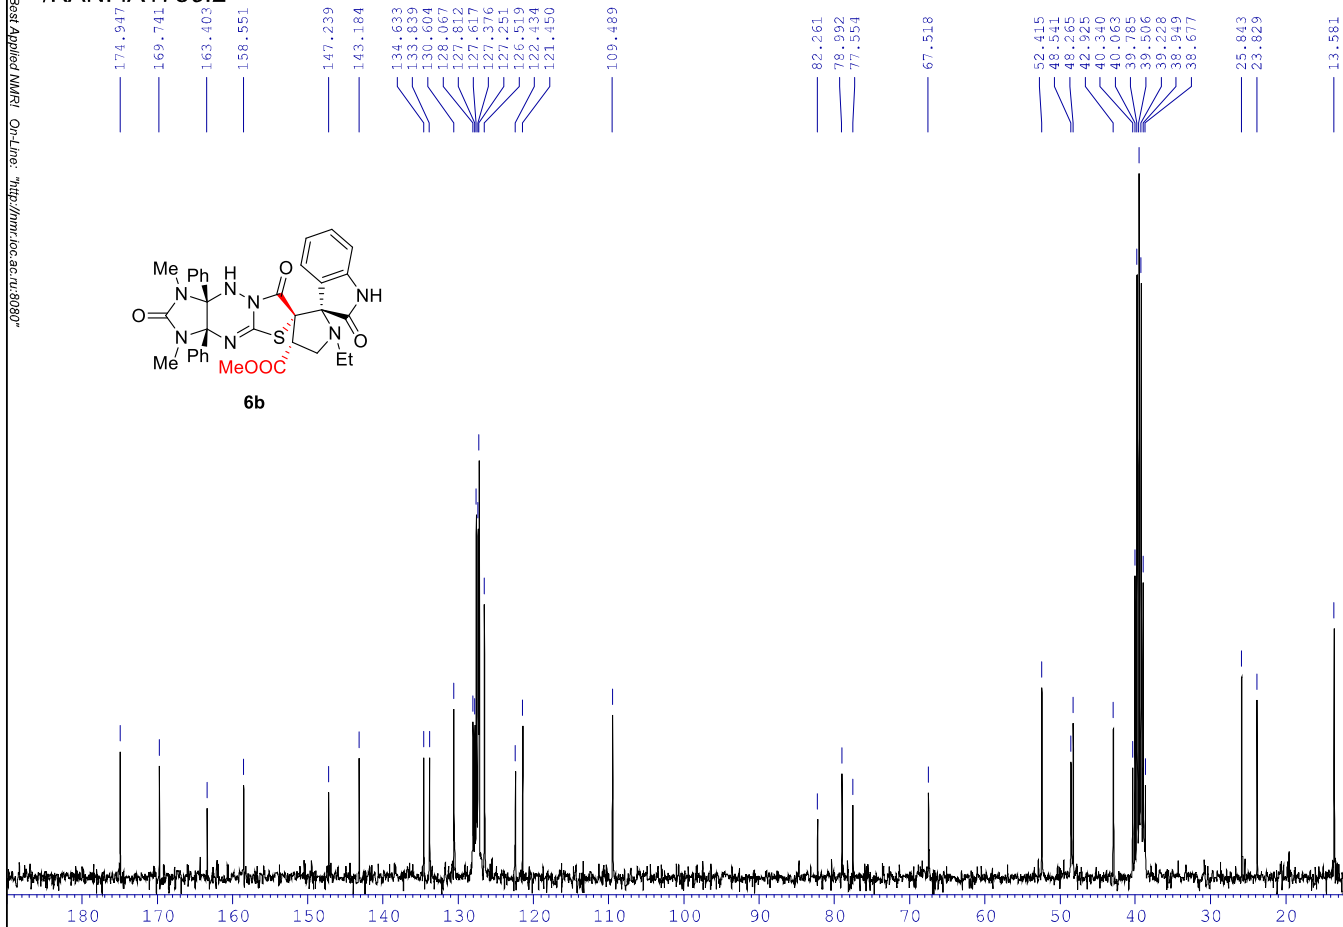

/KANI VDB524.1.1

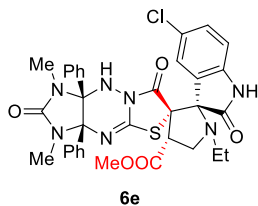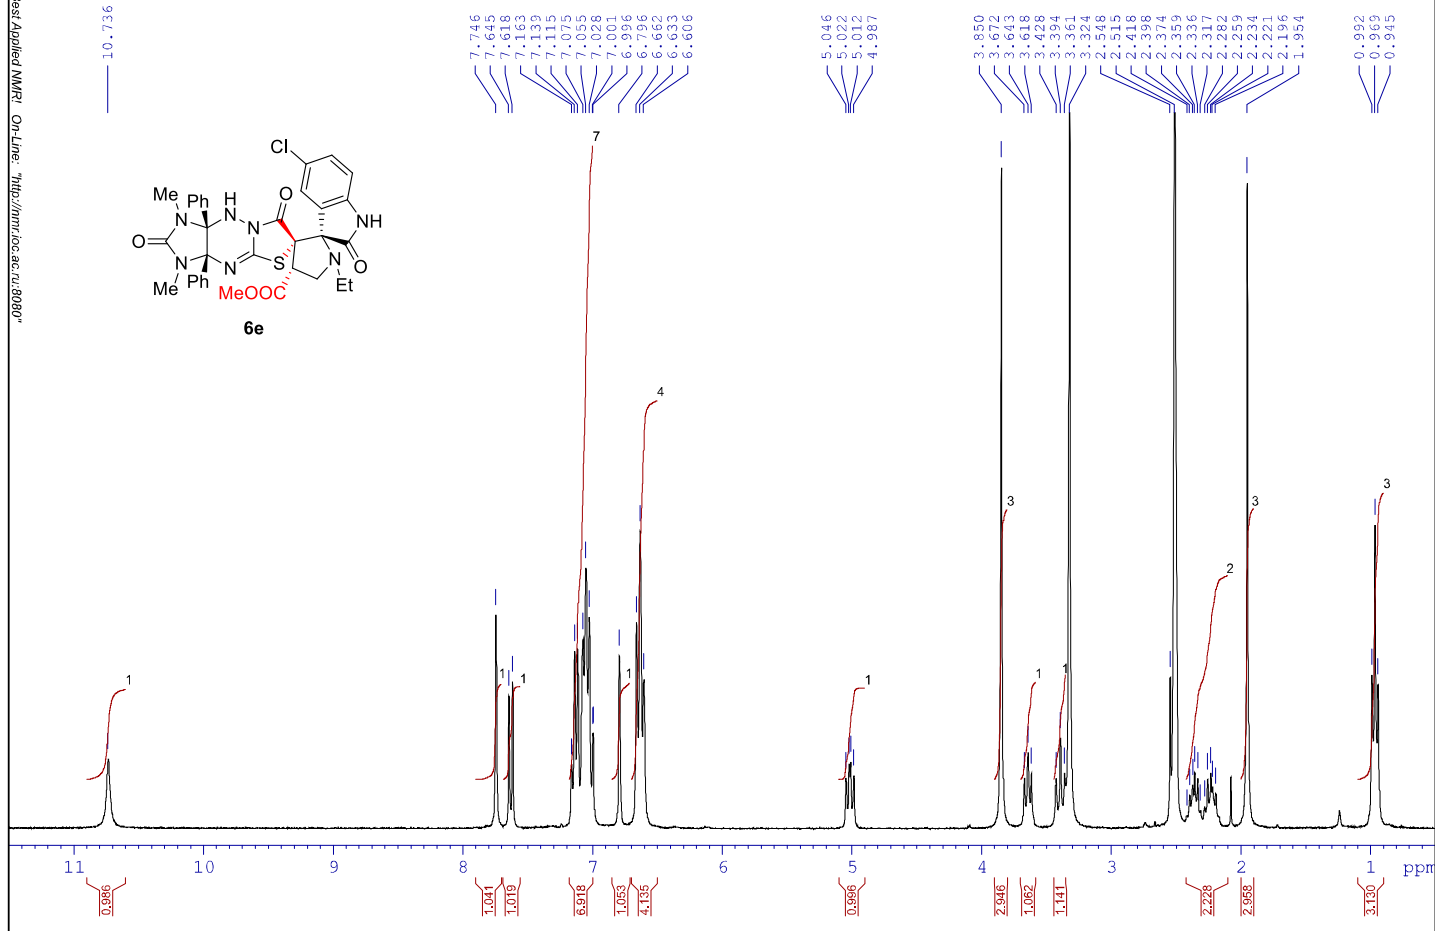

/KANI VDB524.1.1

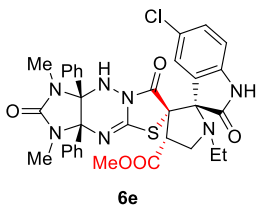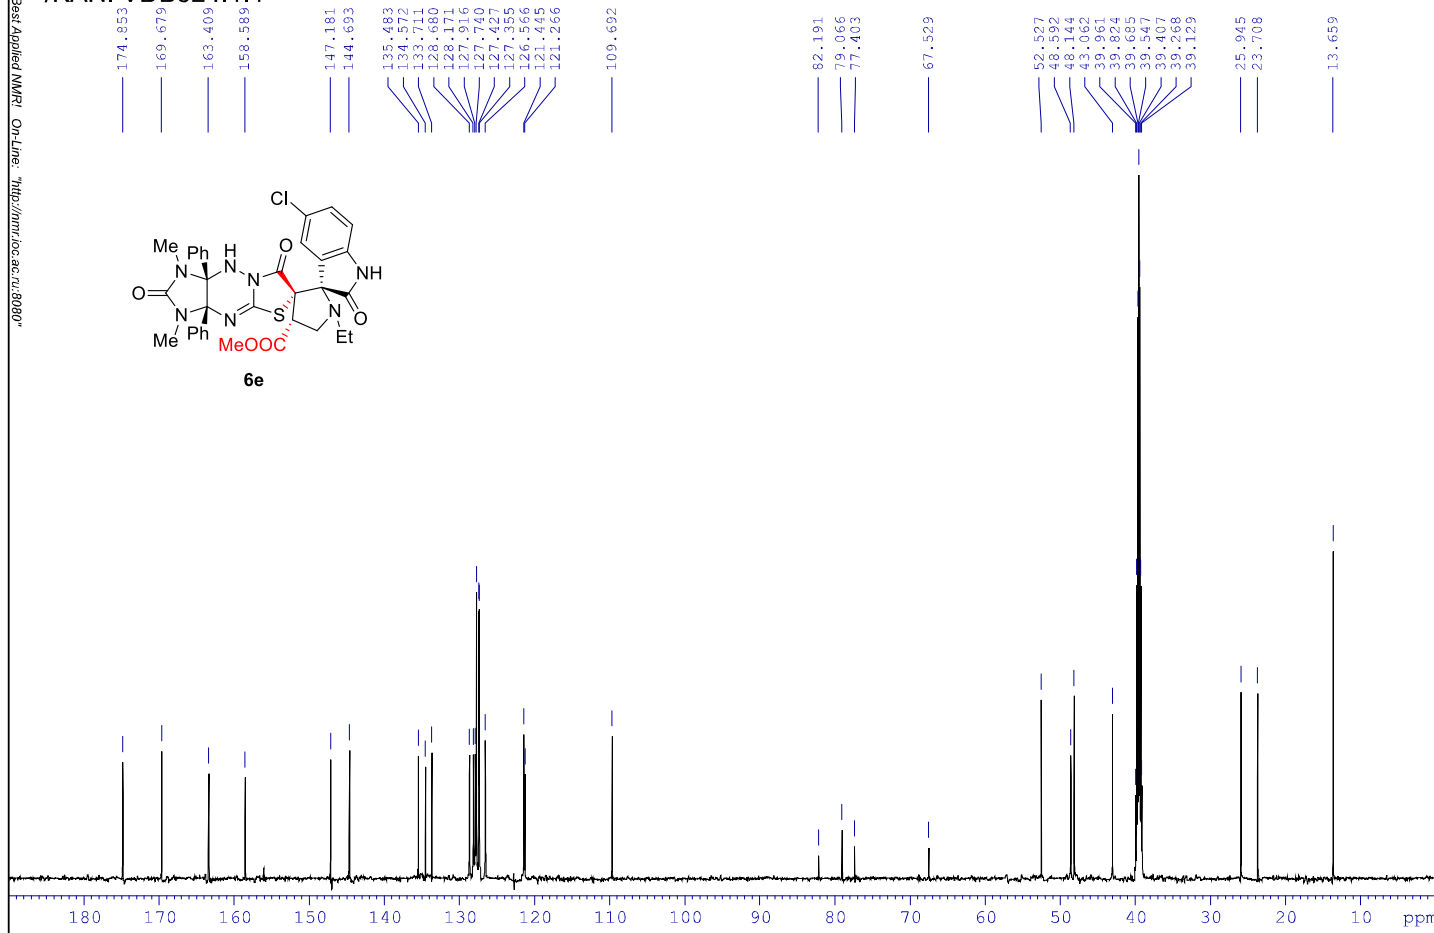

/KANI IA1725.11

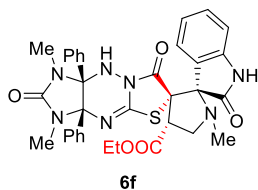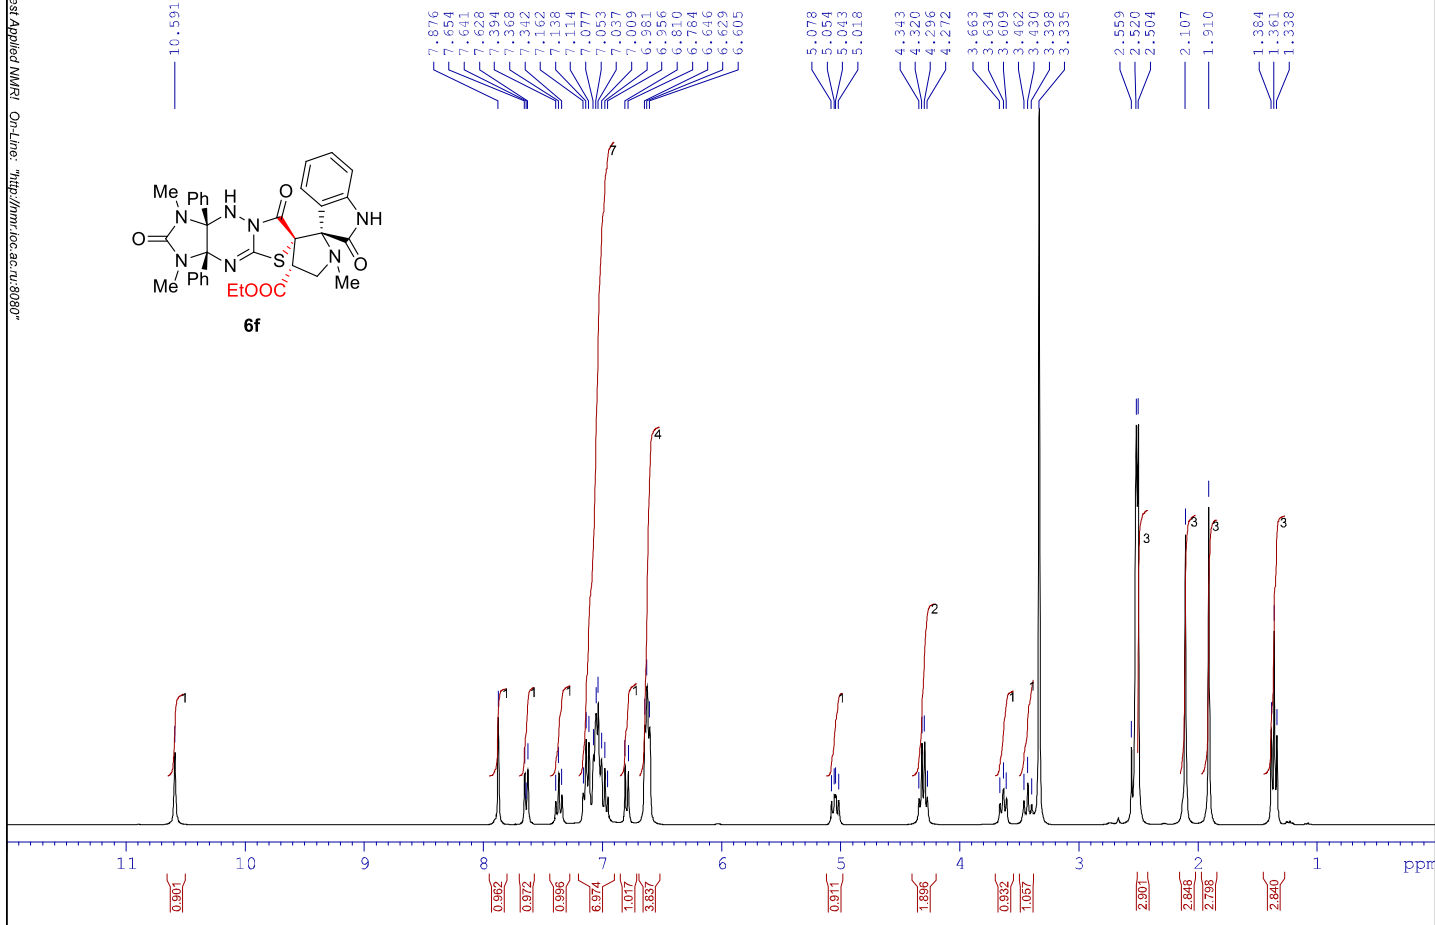

/KANI IA1725.11

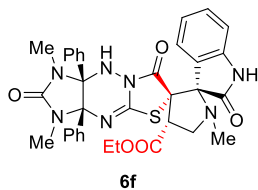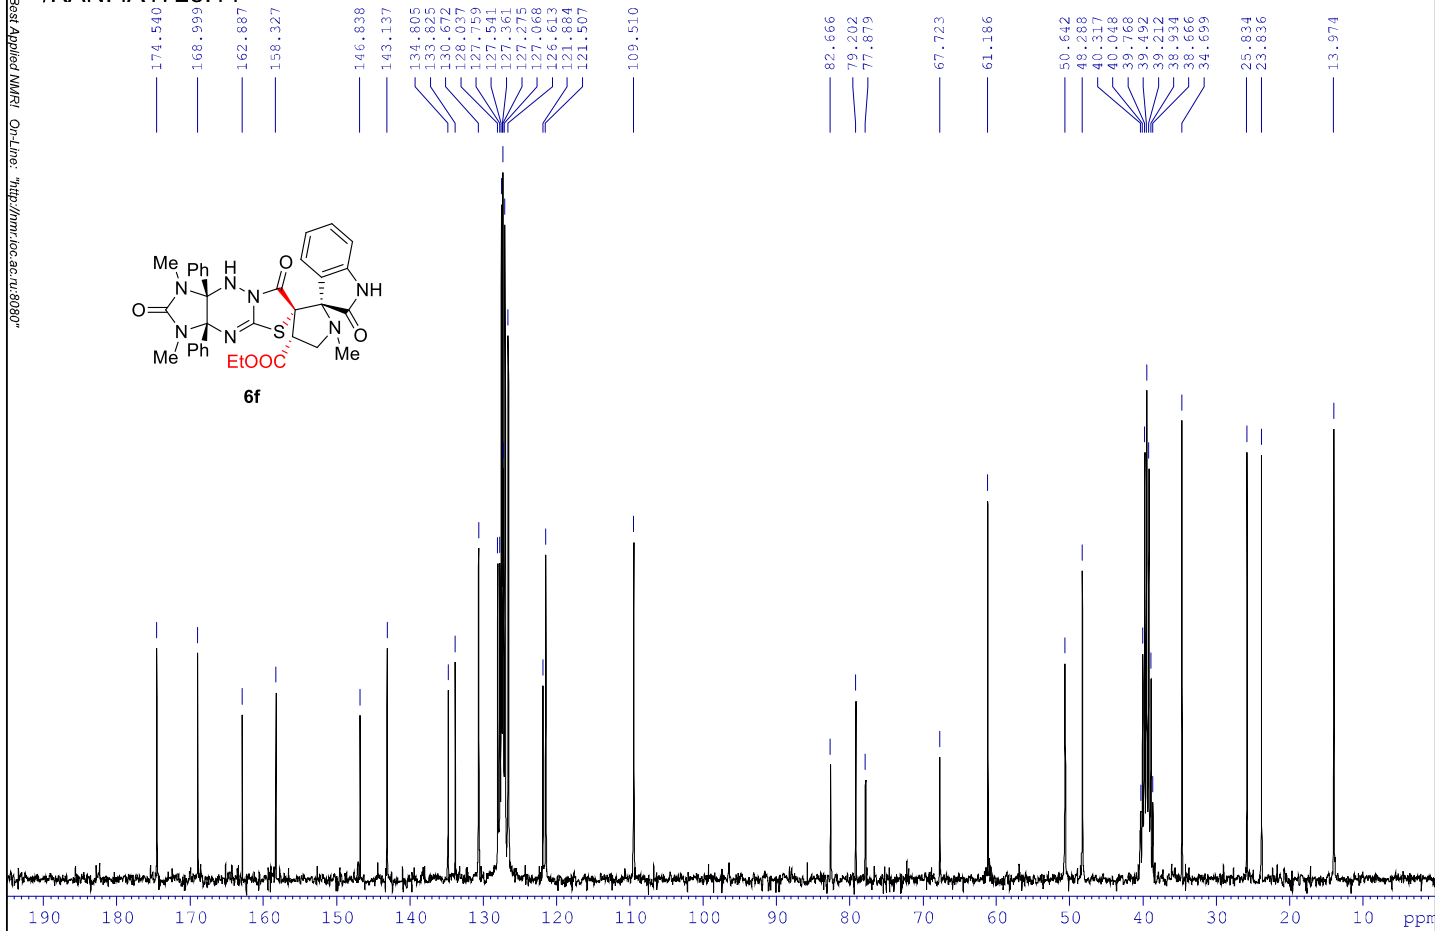

/KANI IA1771.6

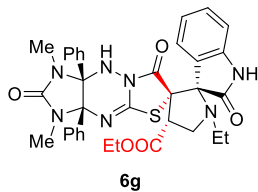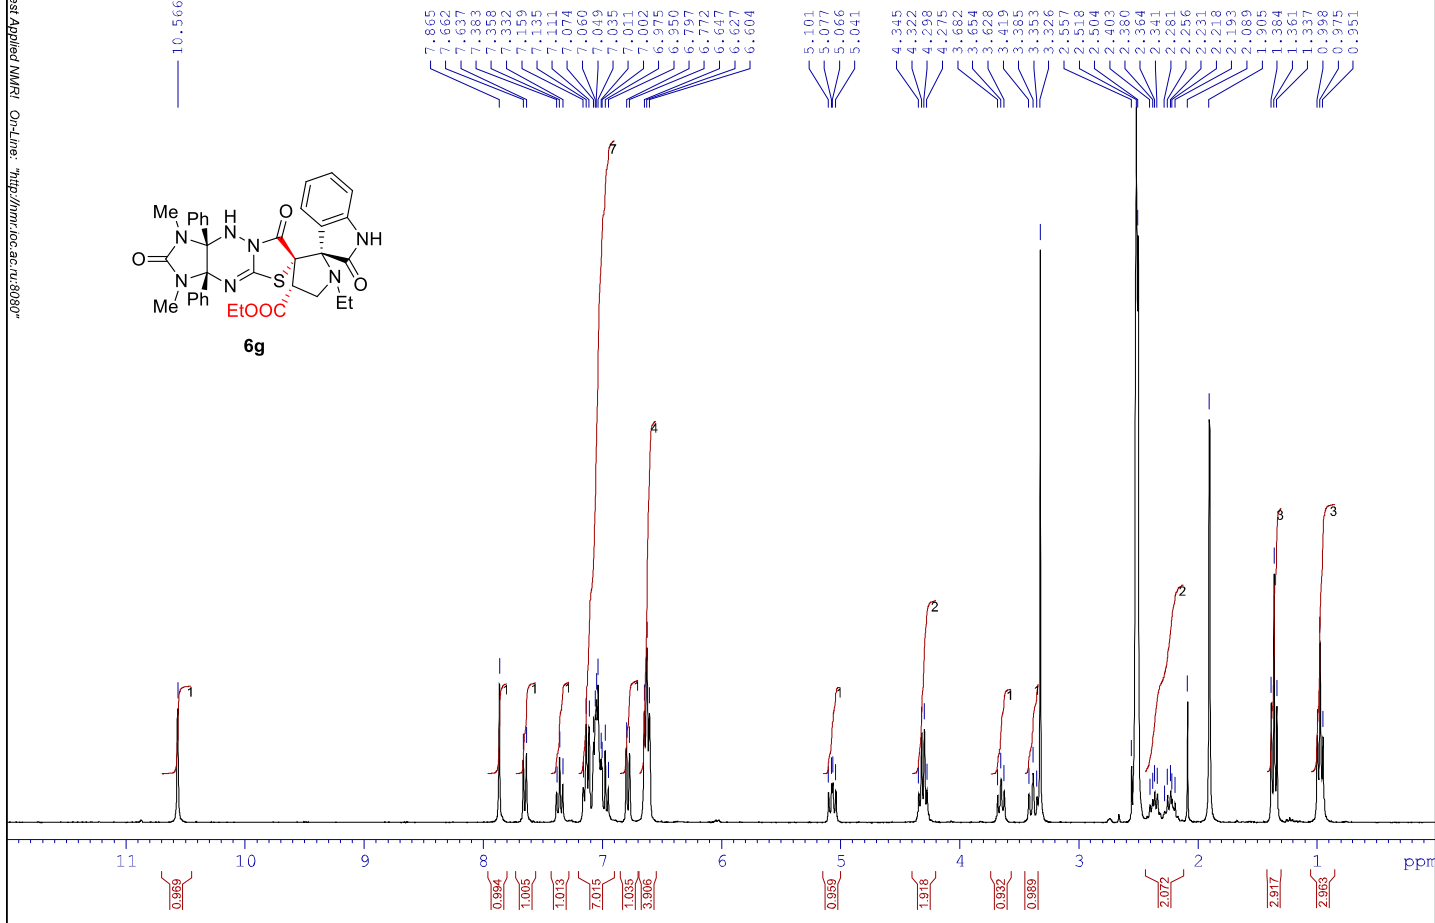



/KANI IA1771.6

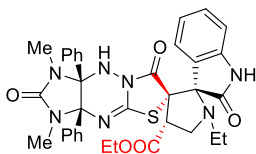

6g

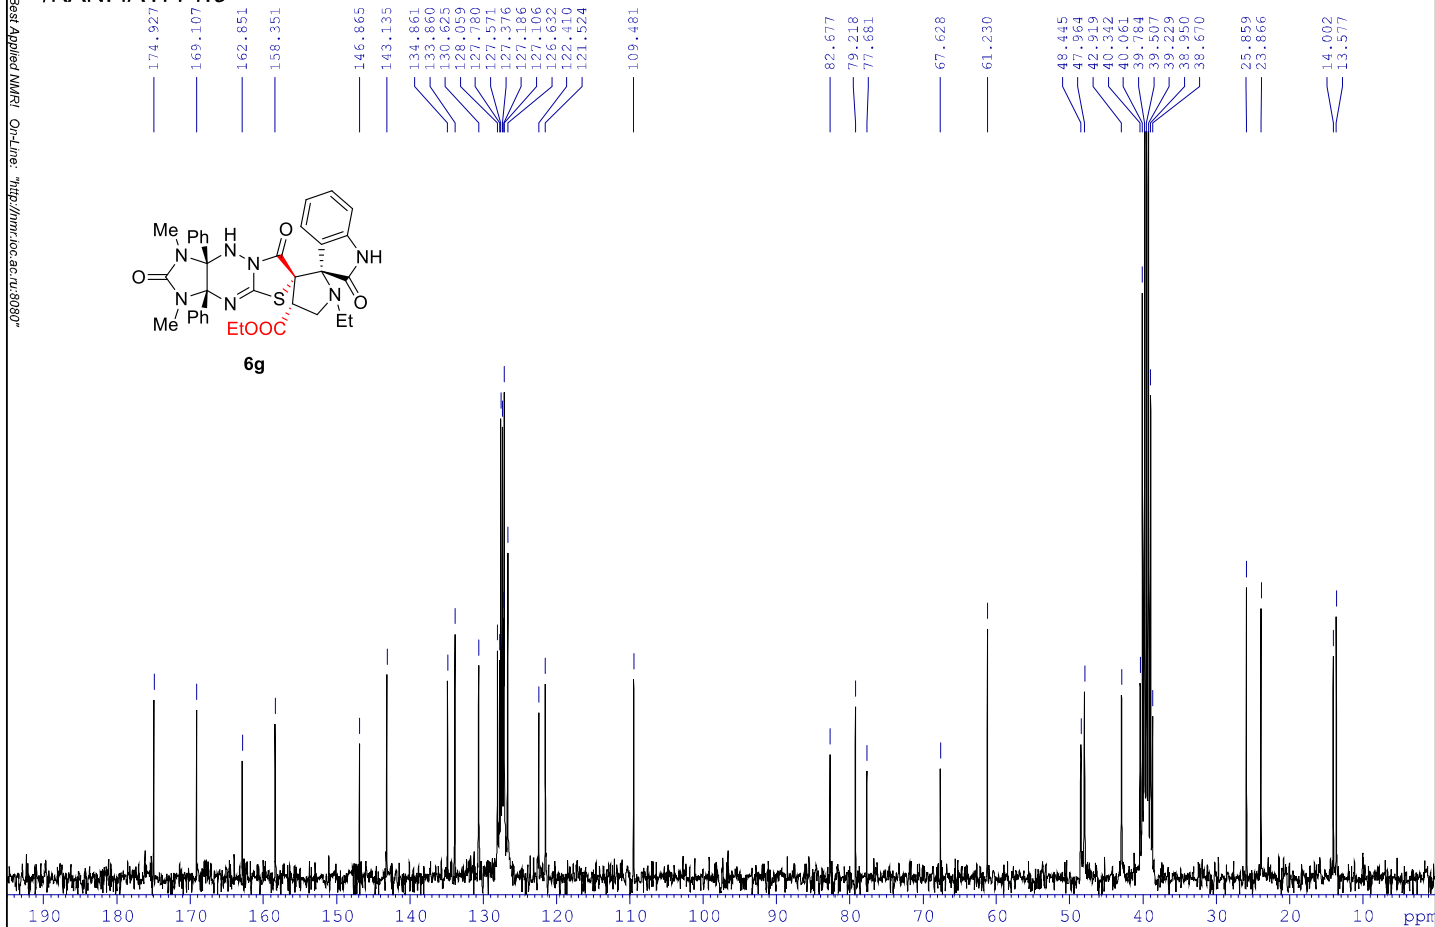

/KANI IA1656.1

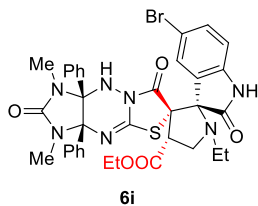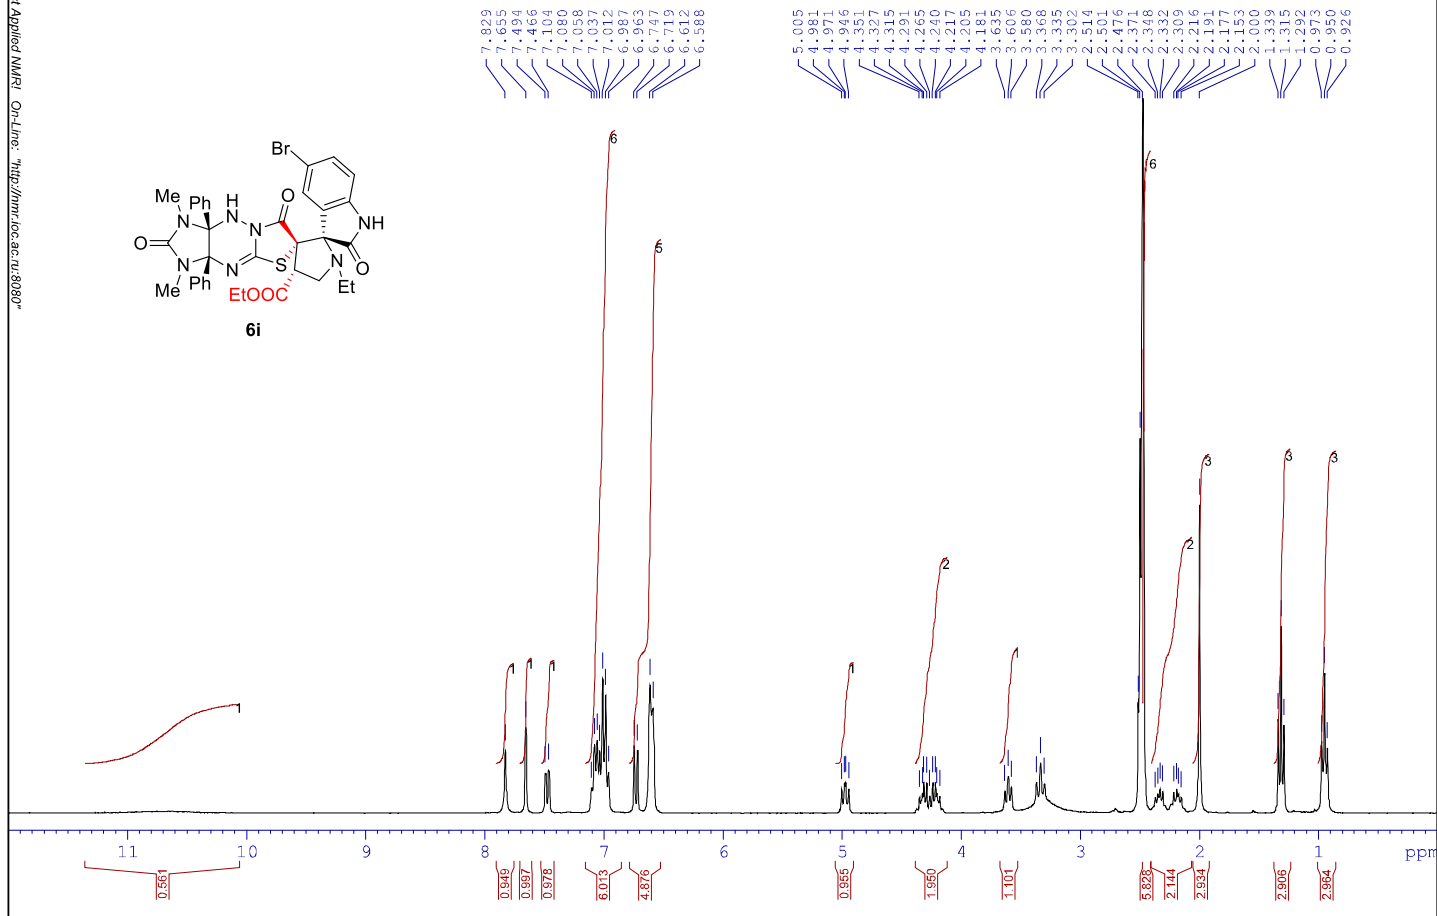

/KANI IA1656.1

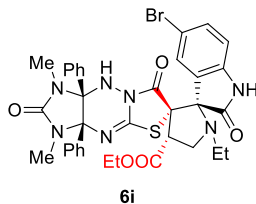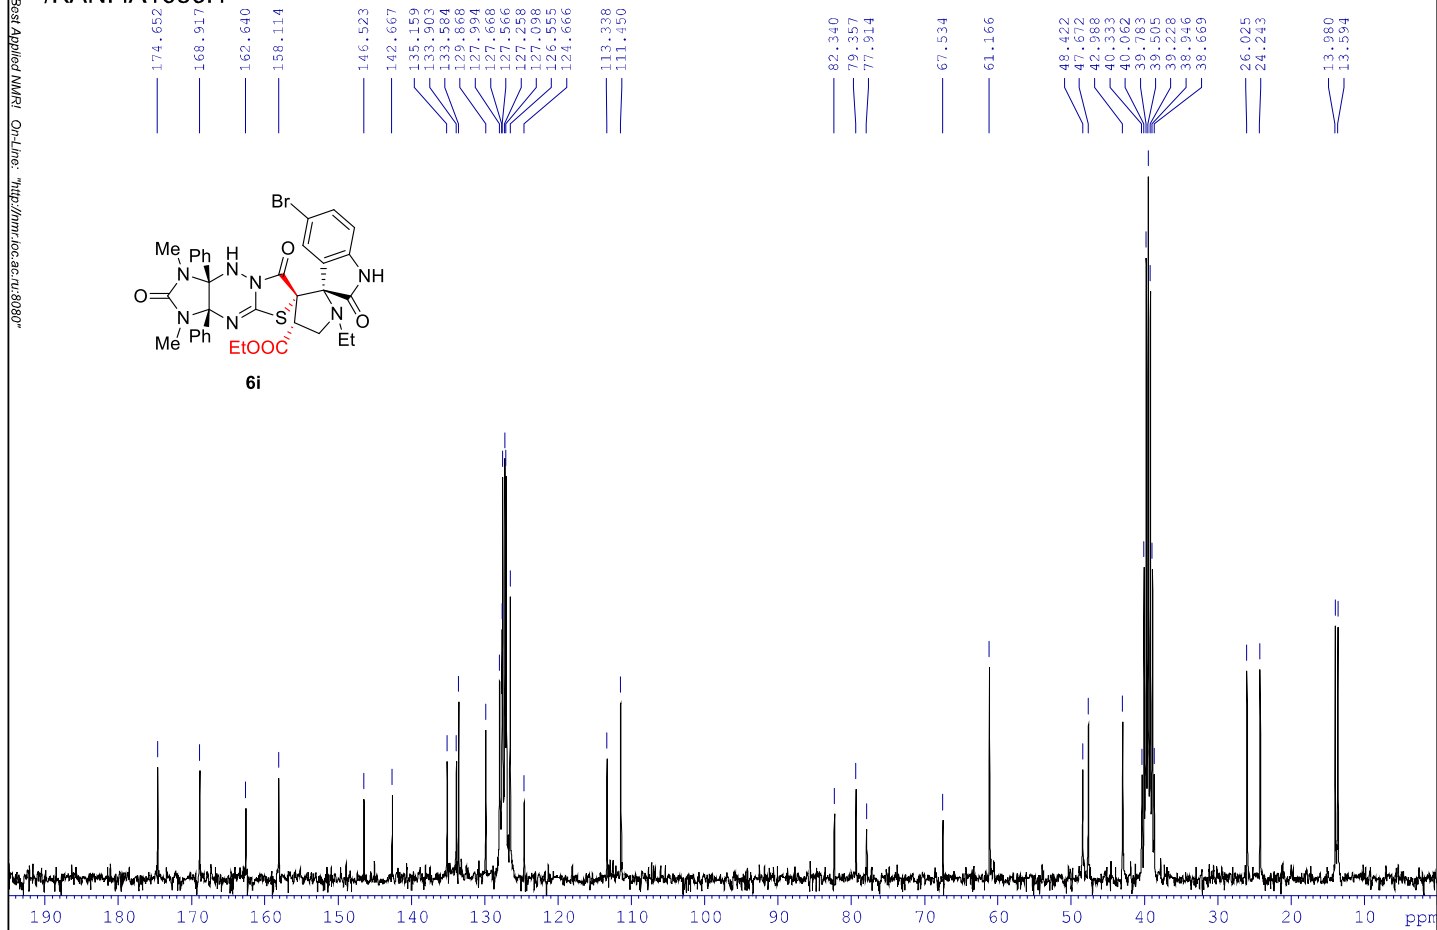

/KANI IA1613.3

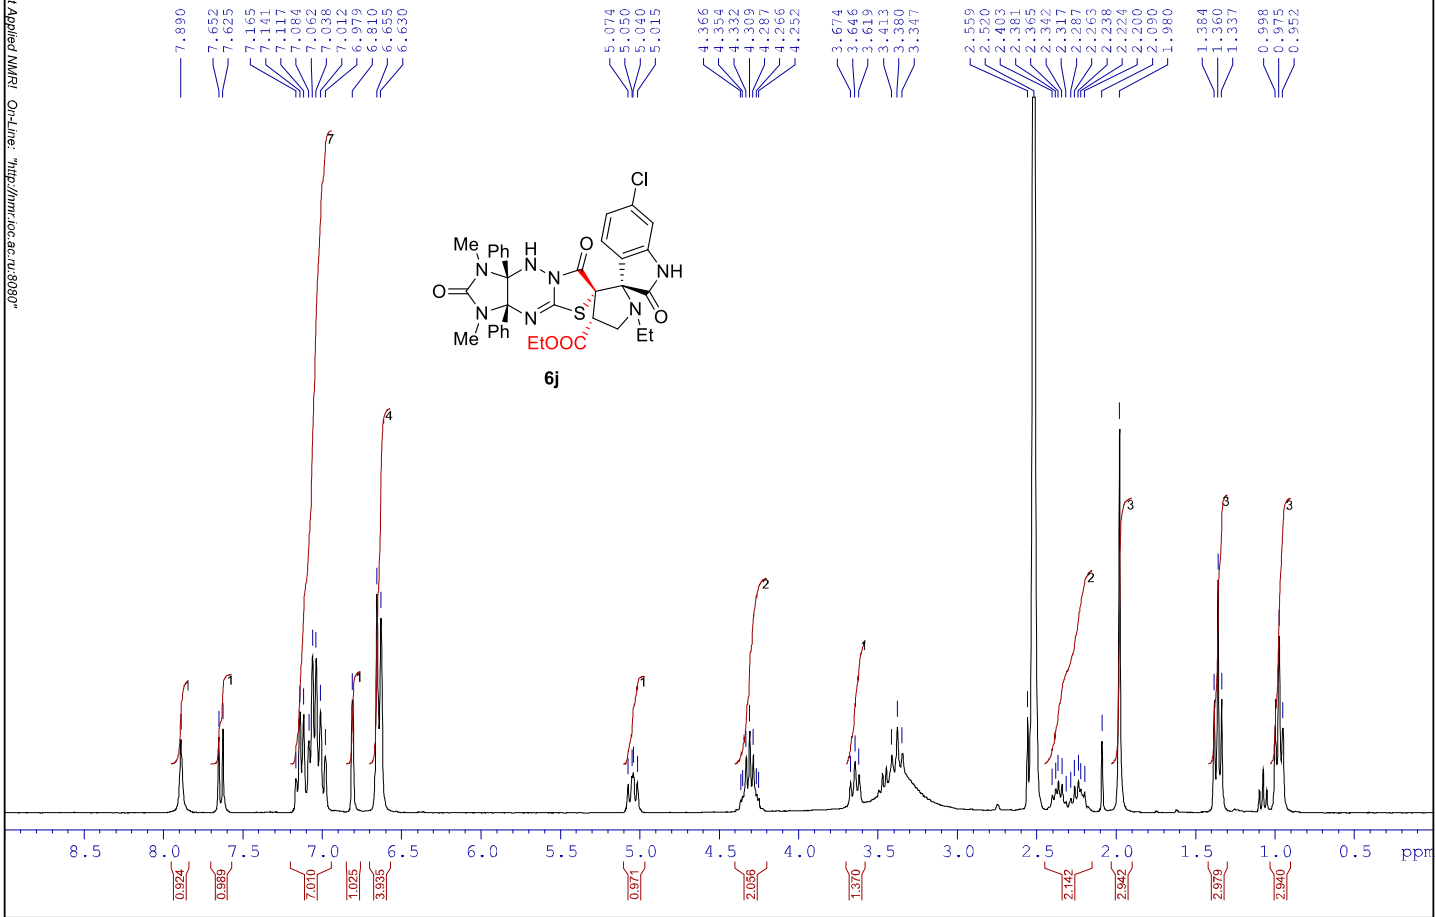

/KANI IA1613.2

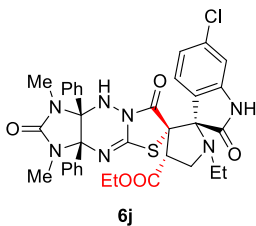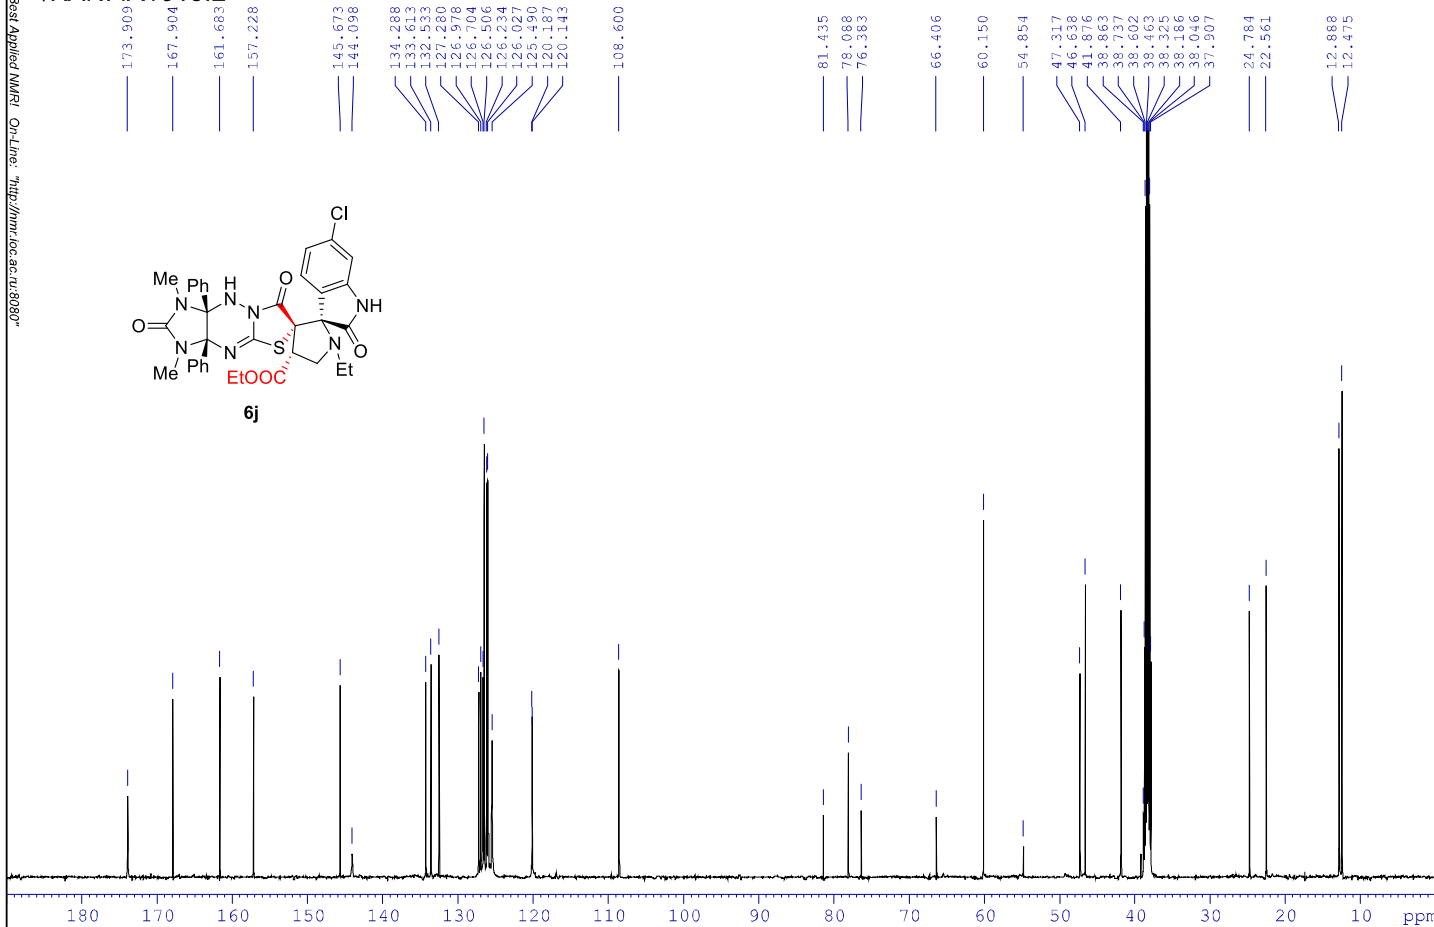

/KANI VDB108.1

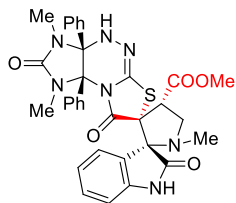

11a

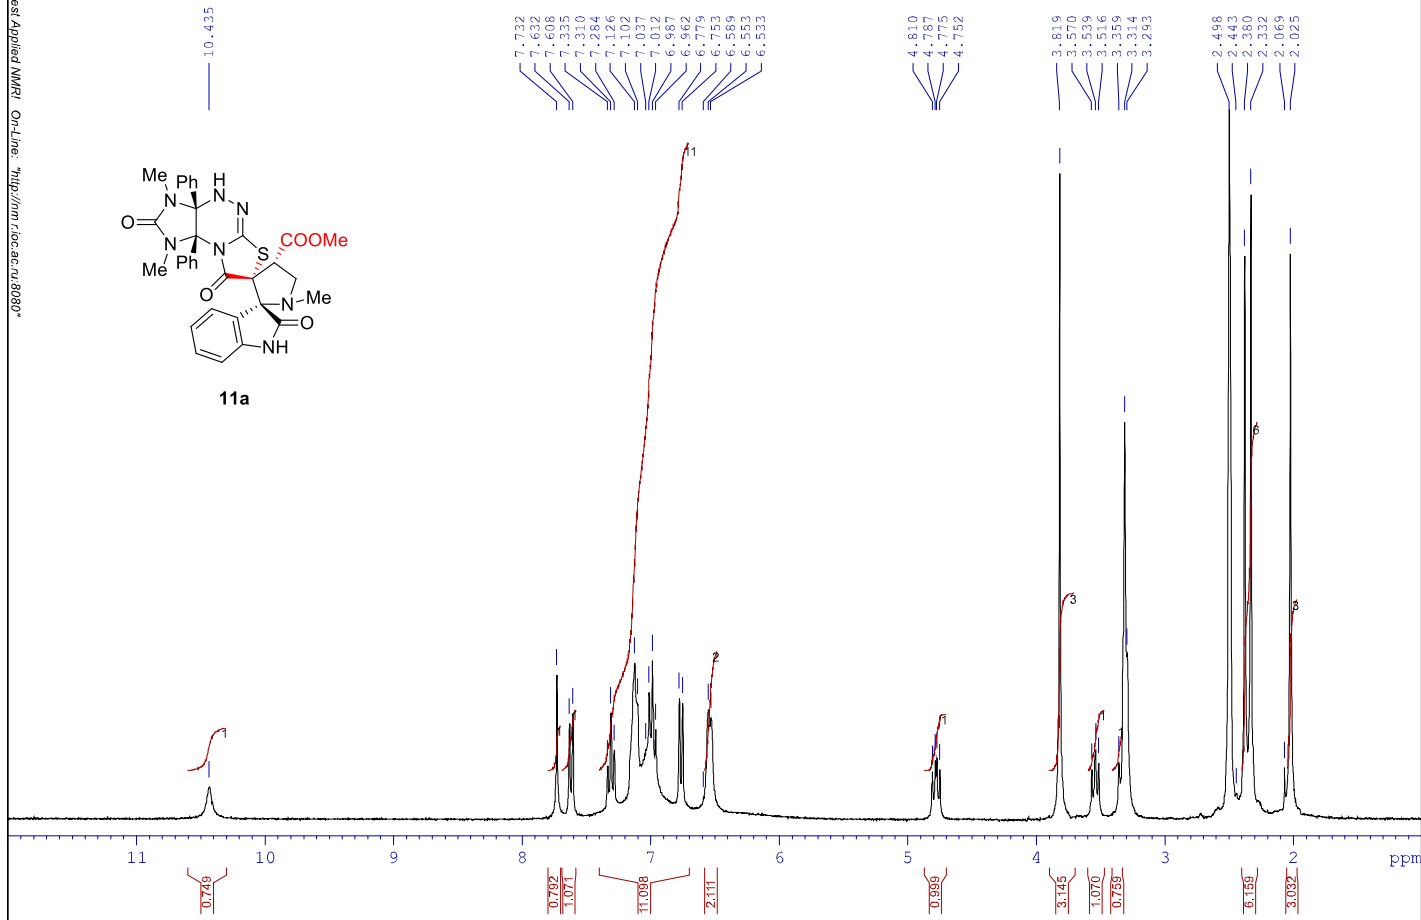

/KANI VDB108.1

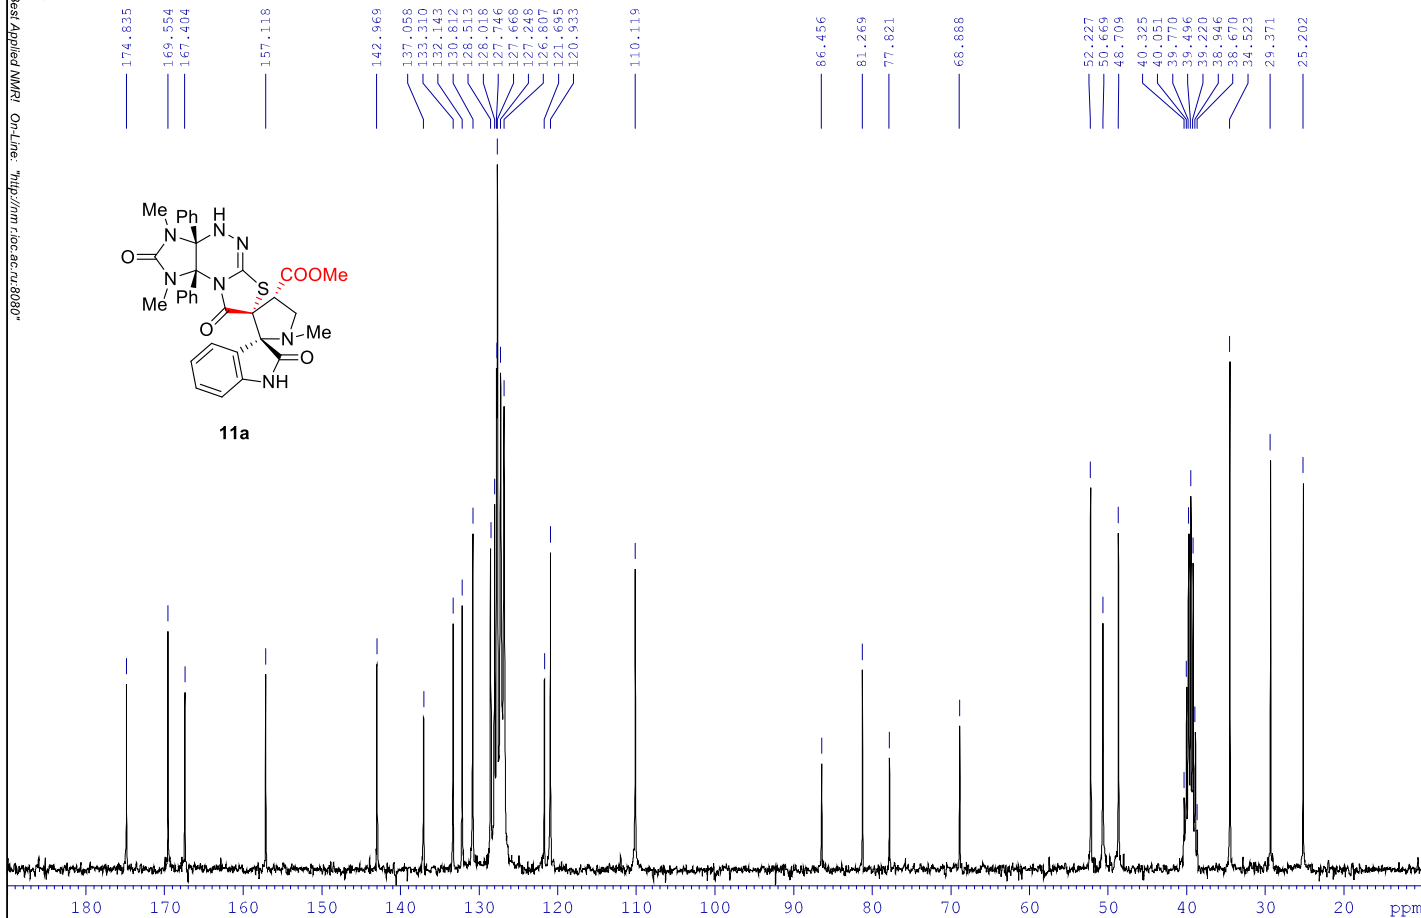

/KANI VDB260.1

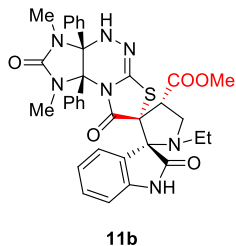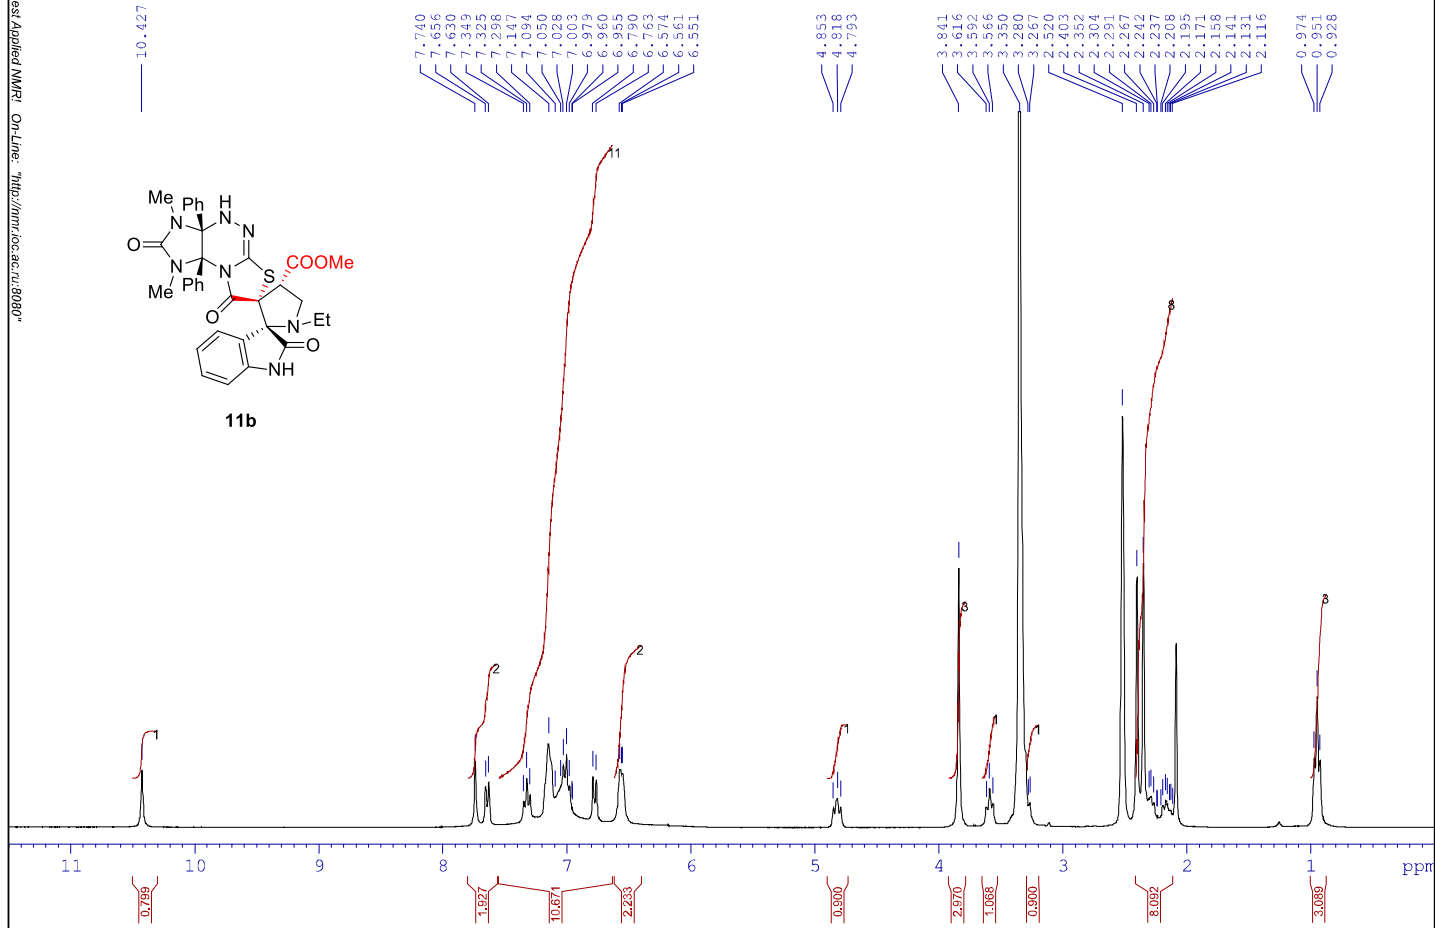



/KANI VDB260.1

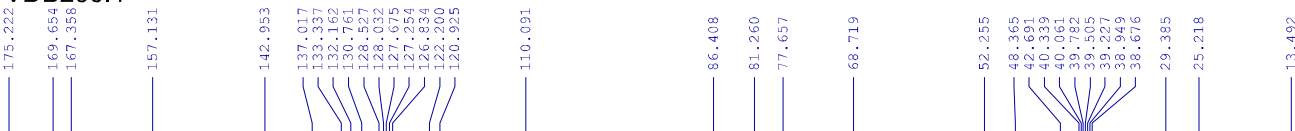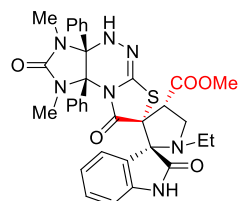

**11b**

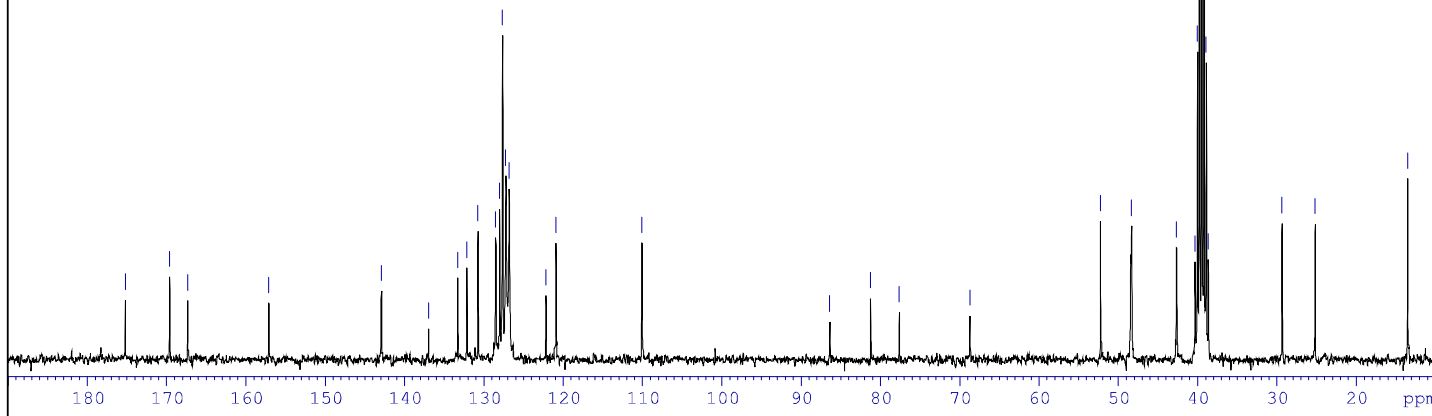

# /KANI VDB75.2

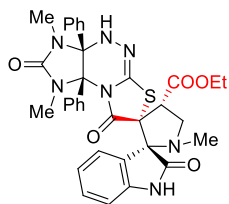

**11c**

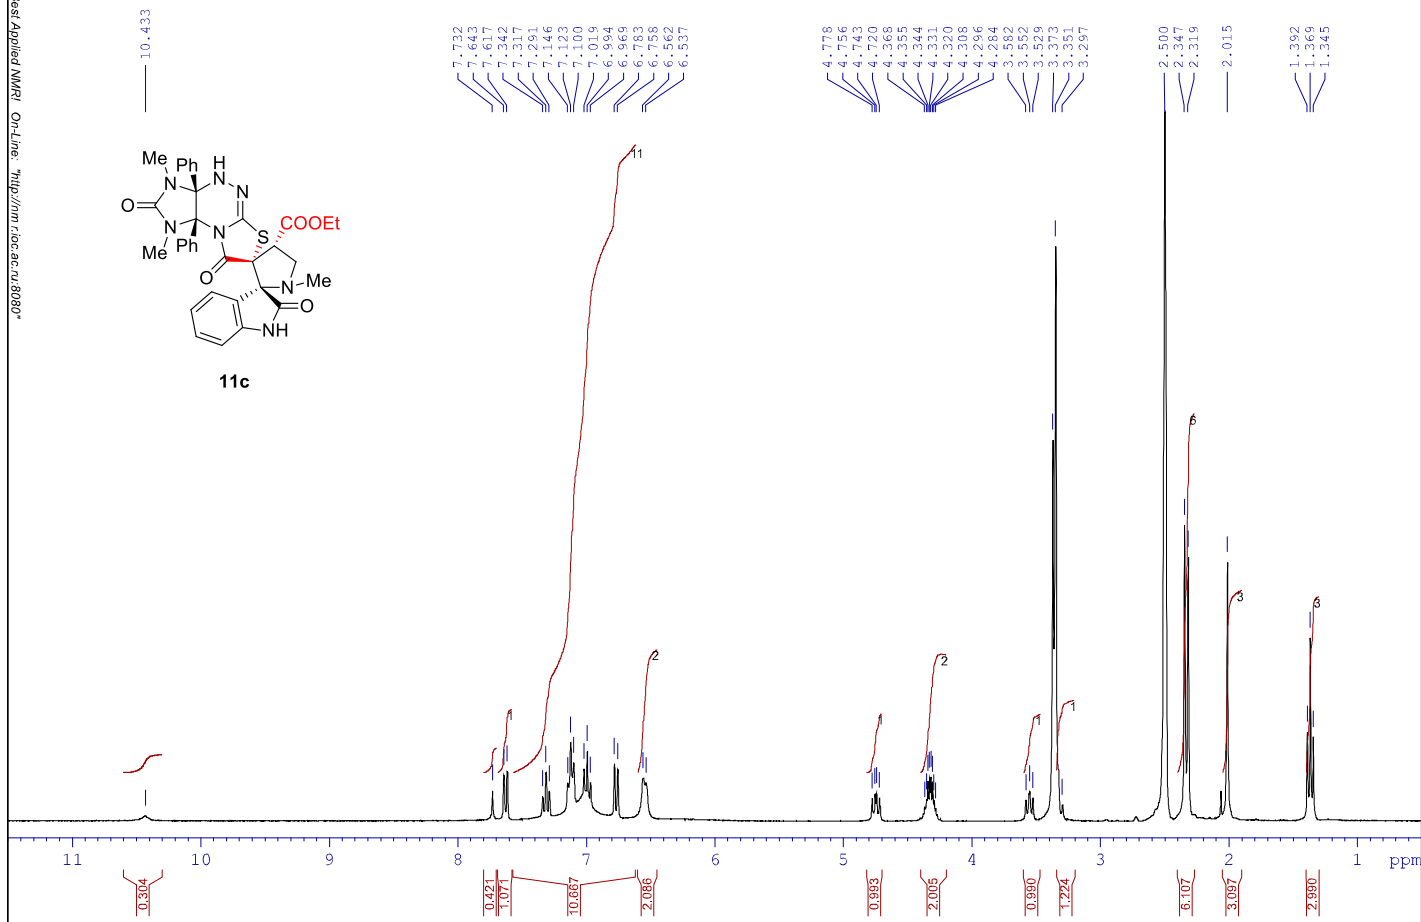

/KANI VDB89.1

DMSO

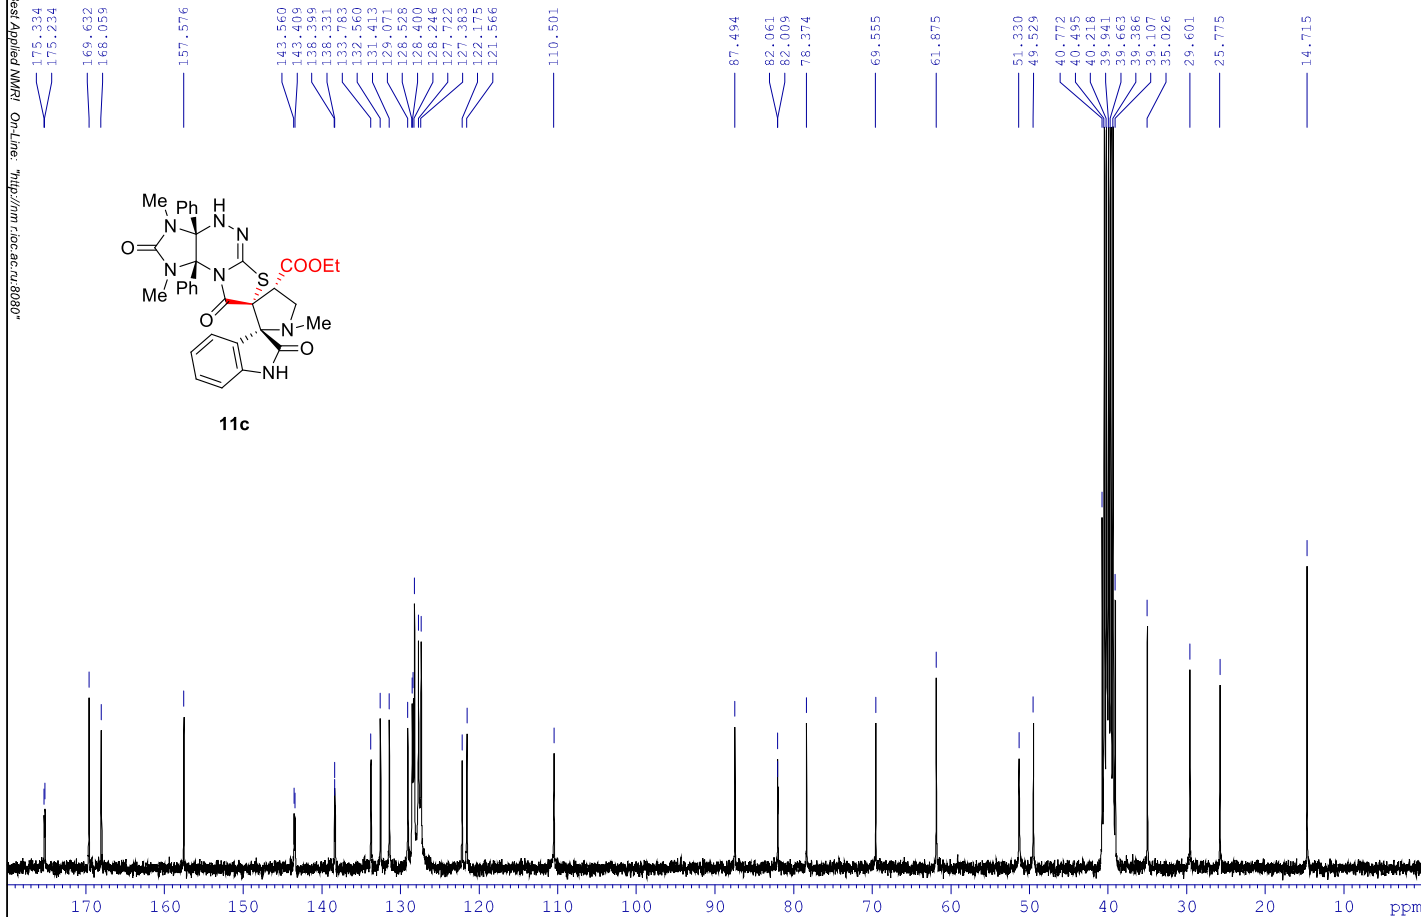

/KANI VDB221.1

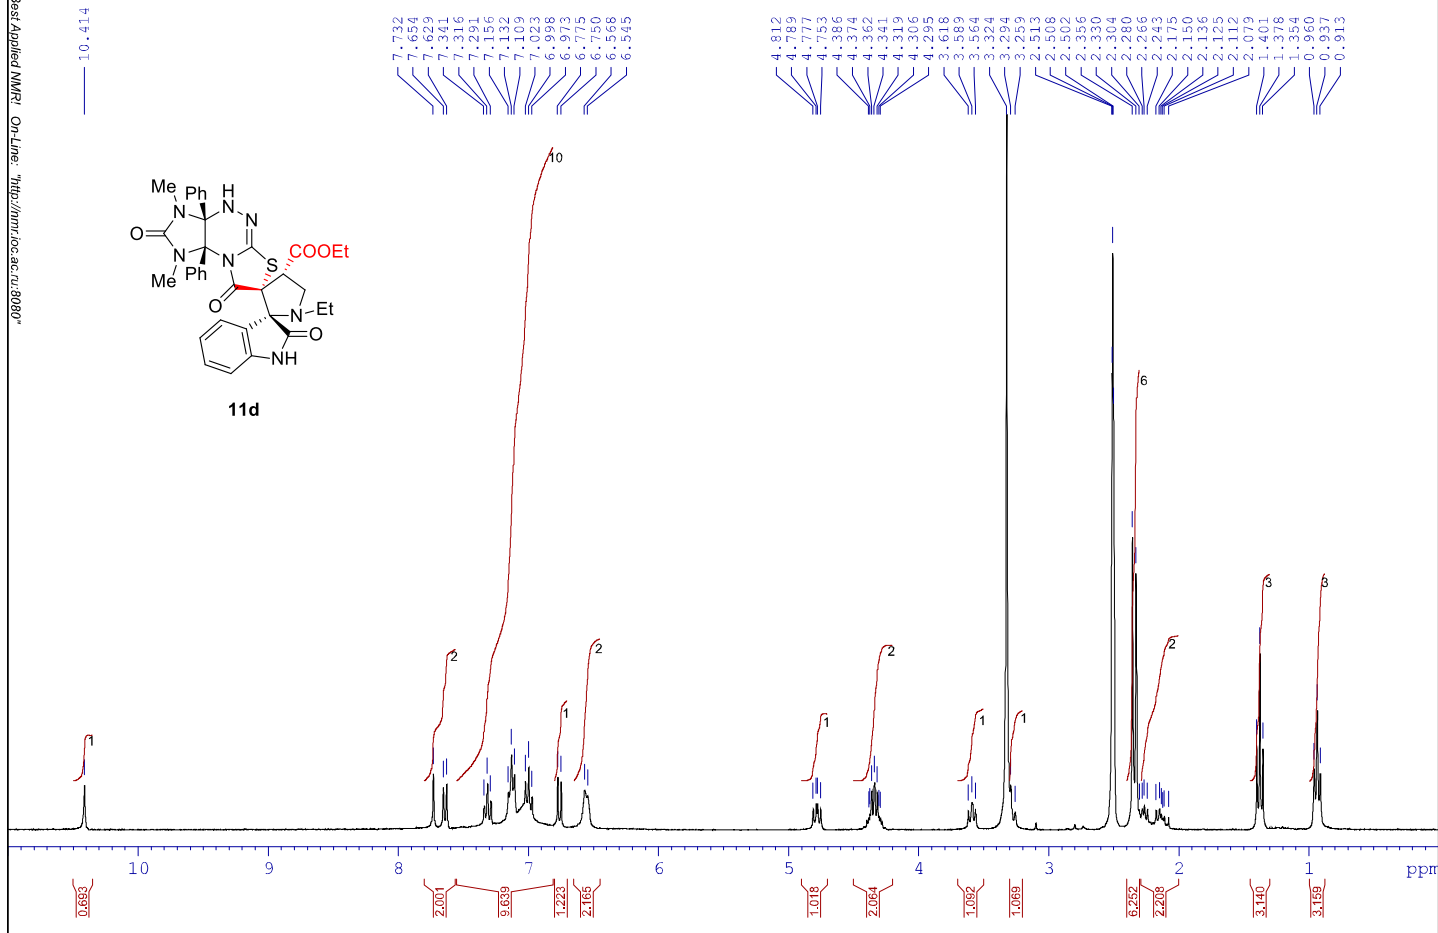

/KANI VDB221.1.1

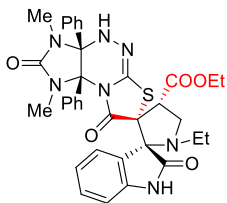

11d

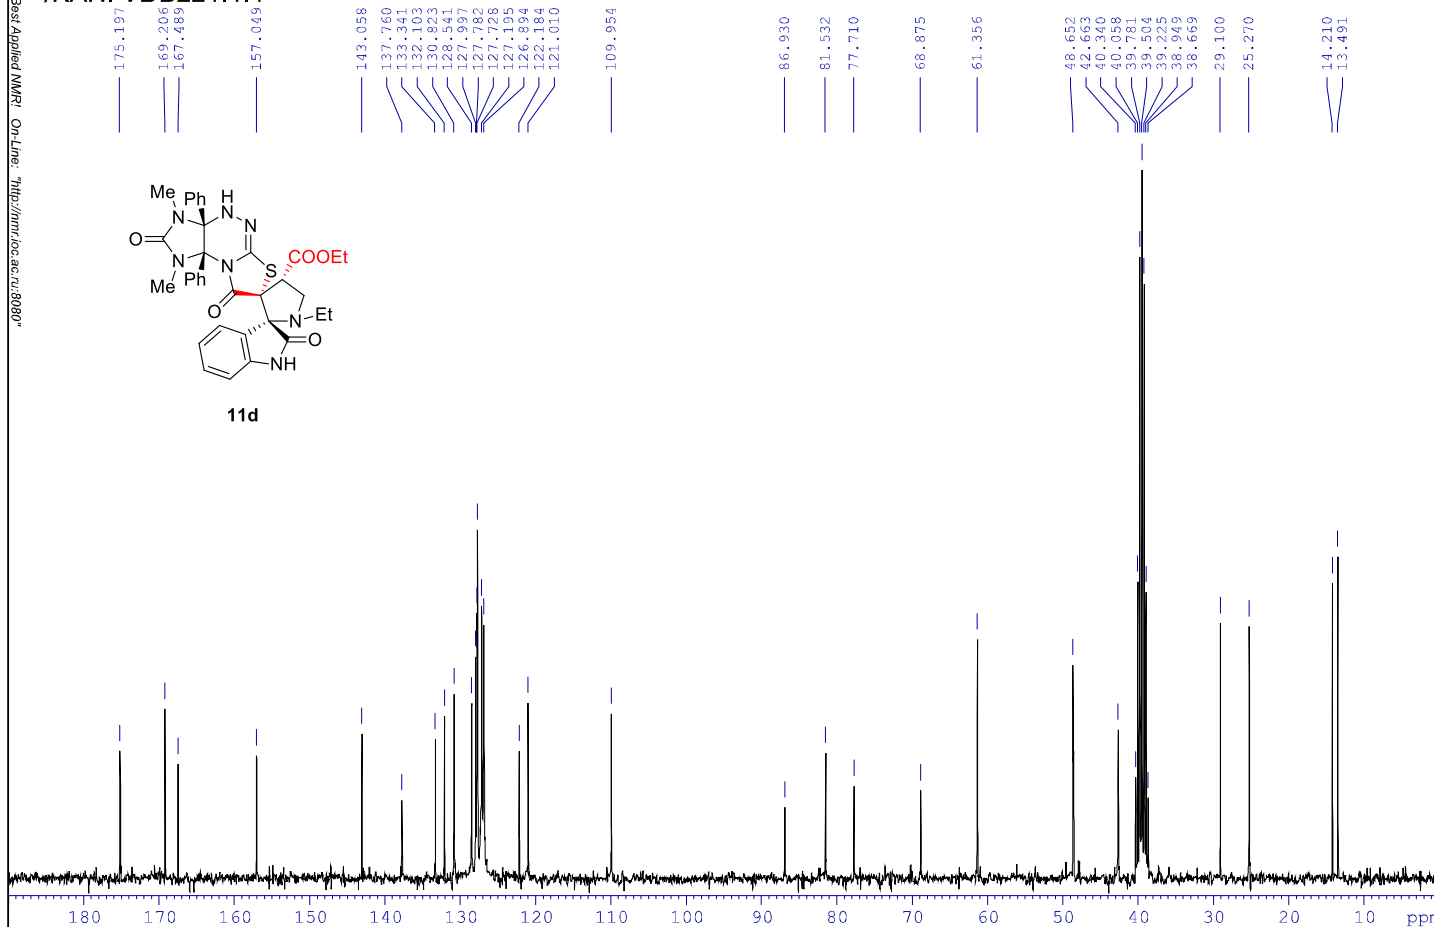

# /KANI VDB268.1 Gazieva-00765

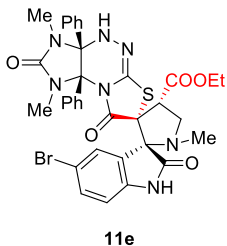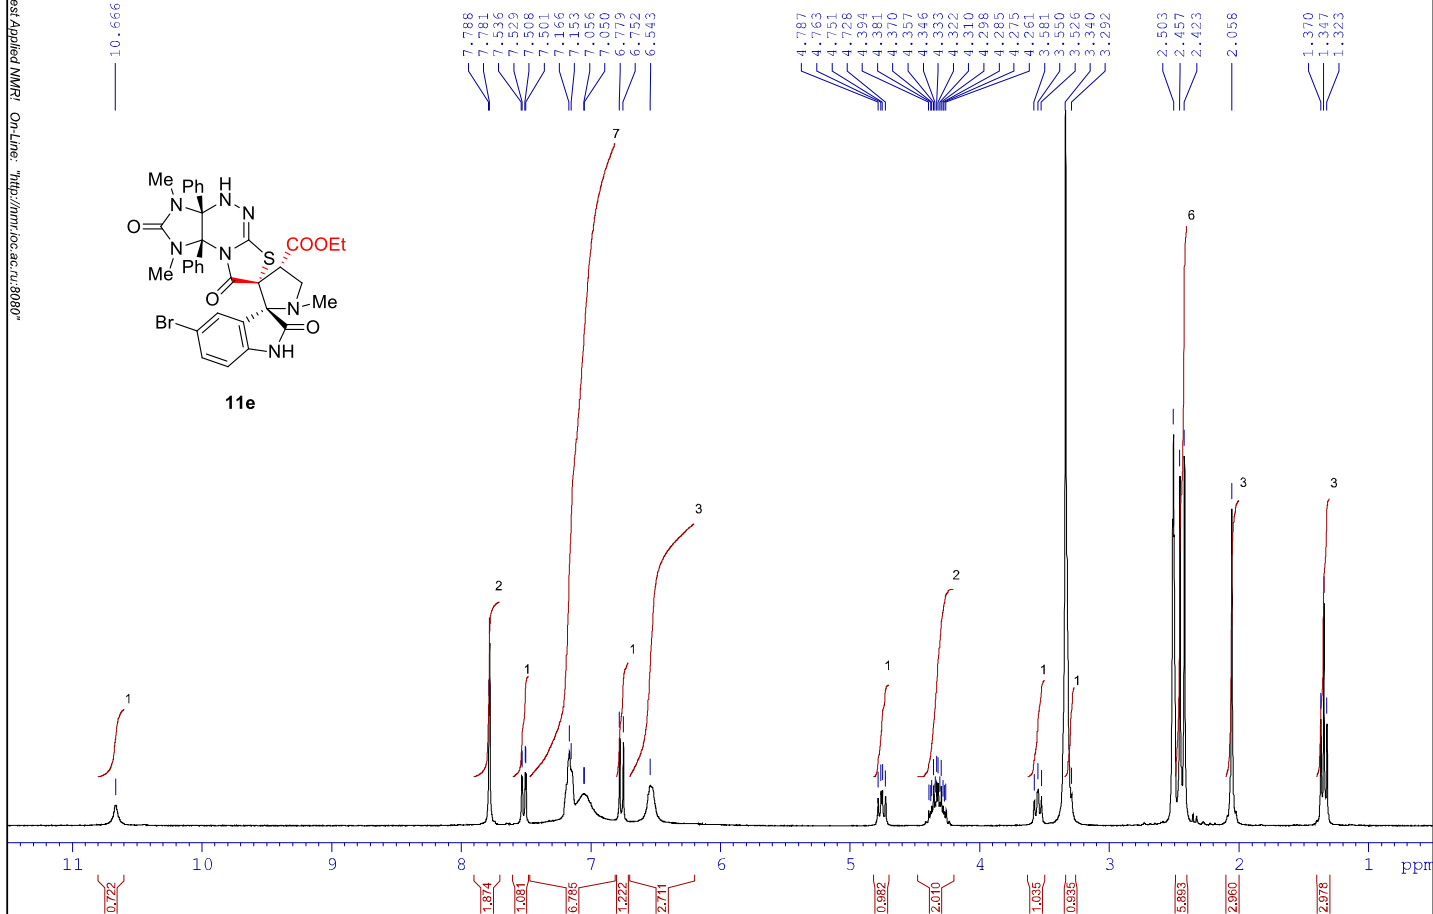

/KANI VDB268.1

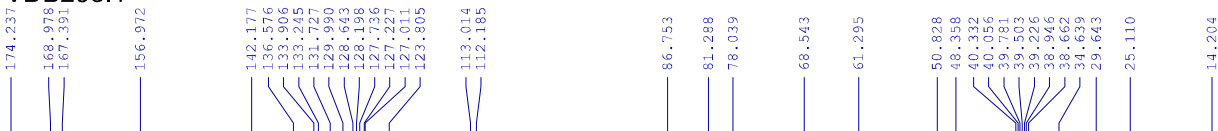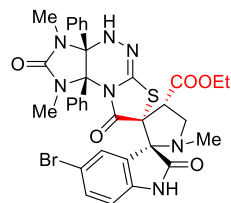

11e

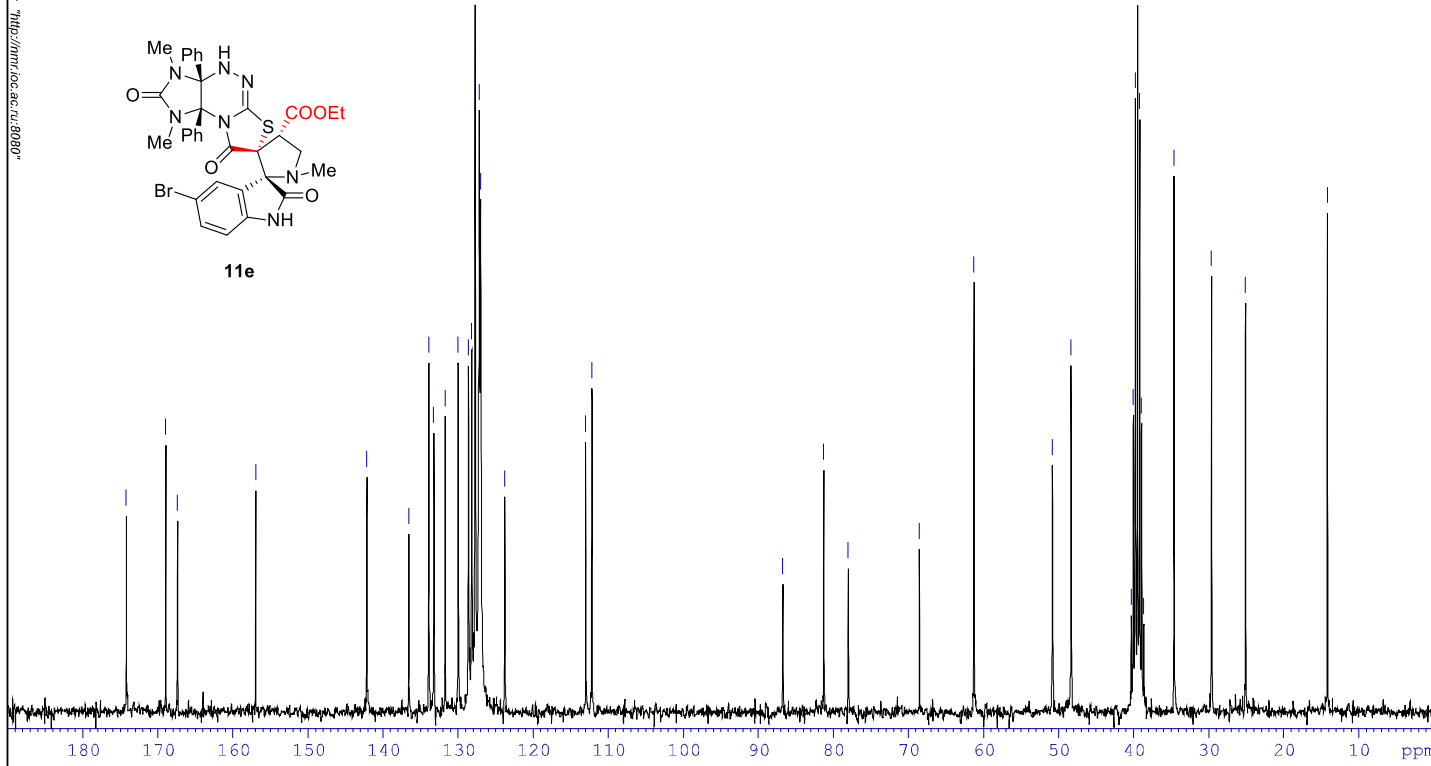

## /KANI VDB269.1.1

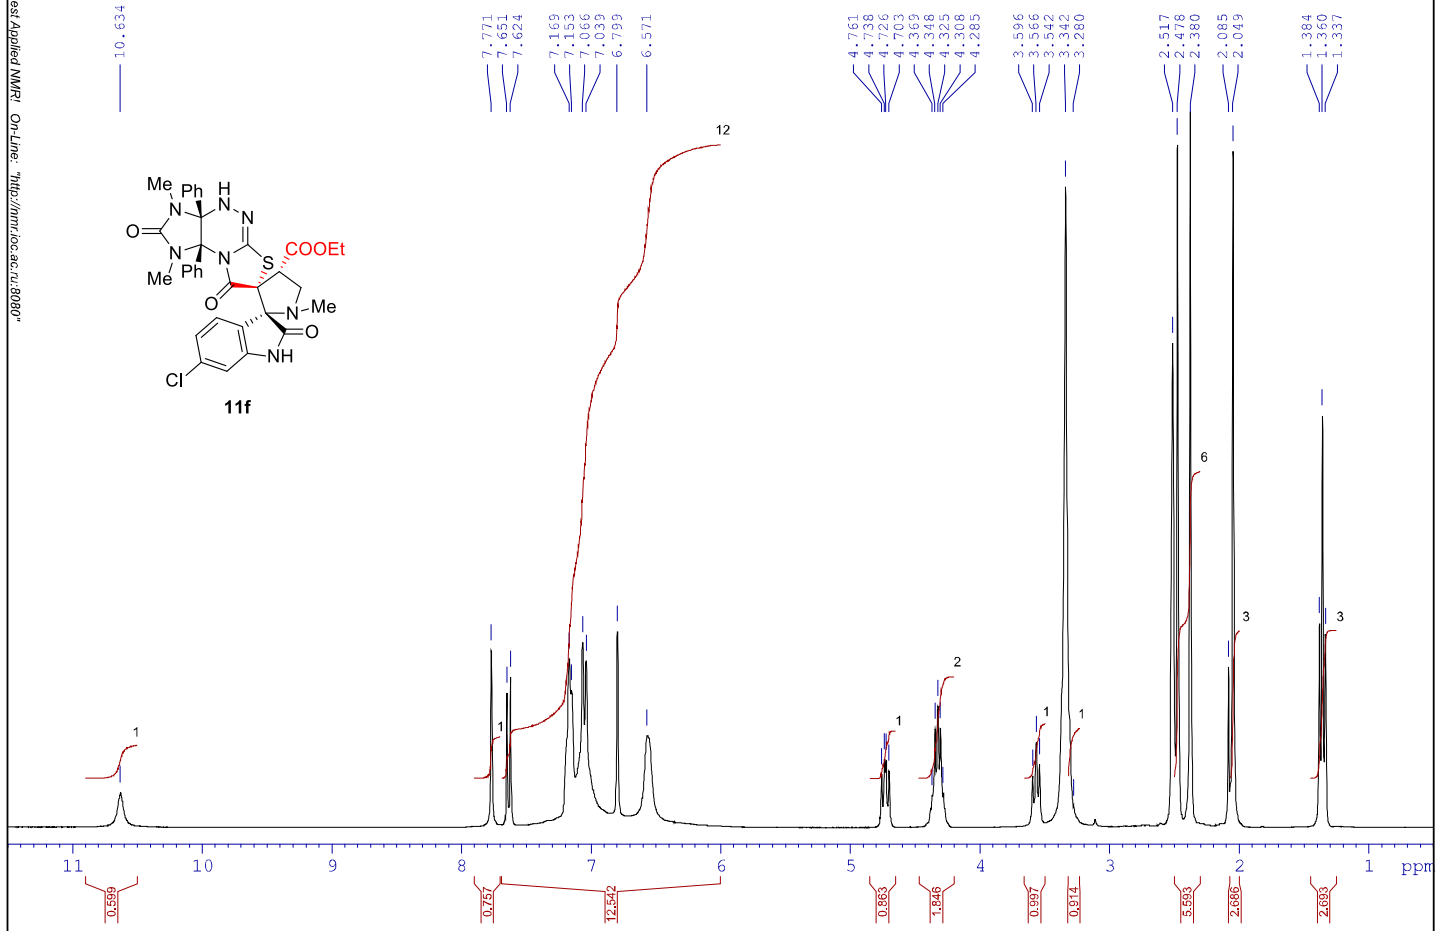



/KANI VDB269.1.1

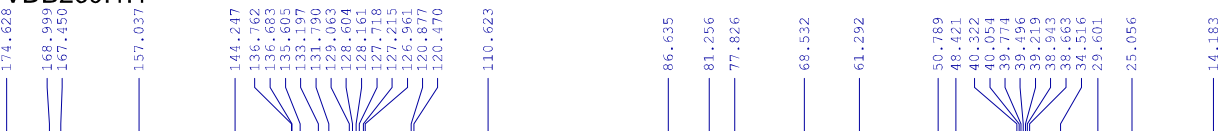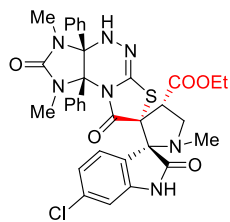

11f

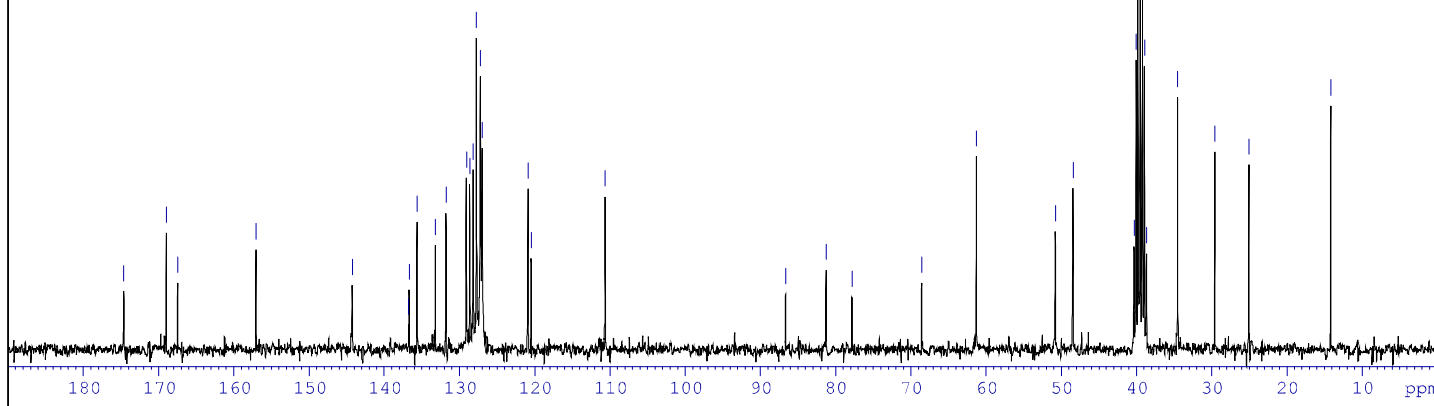

/KANI IA1595.3  
NOESY

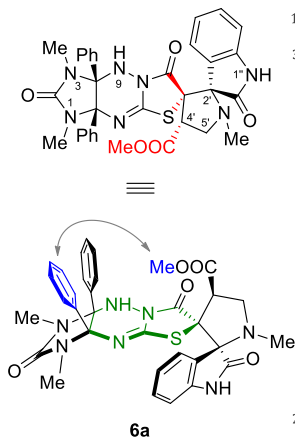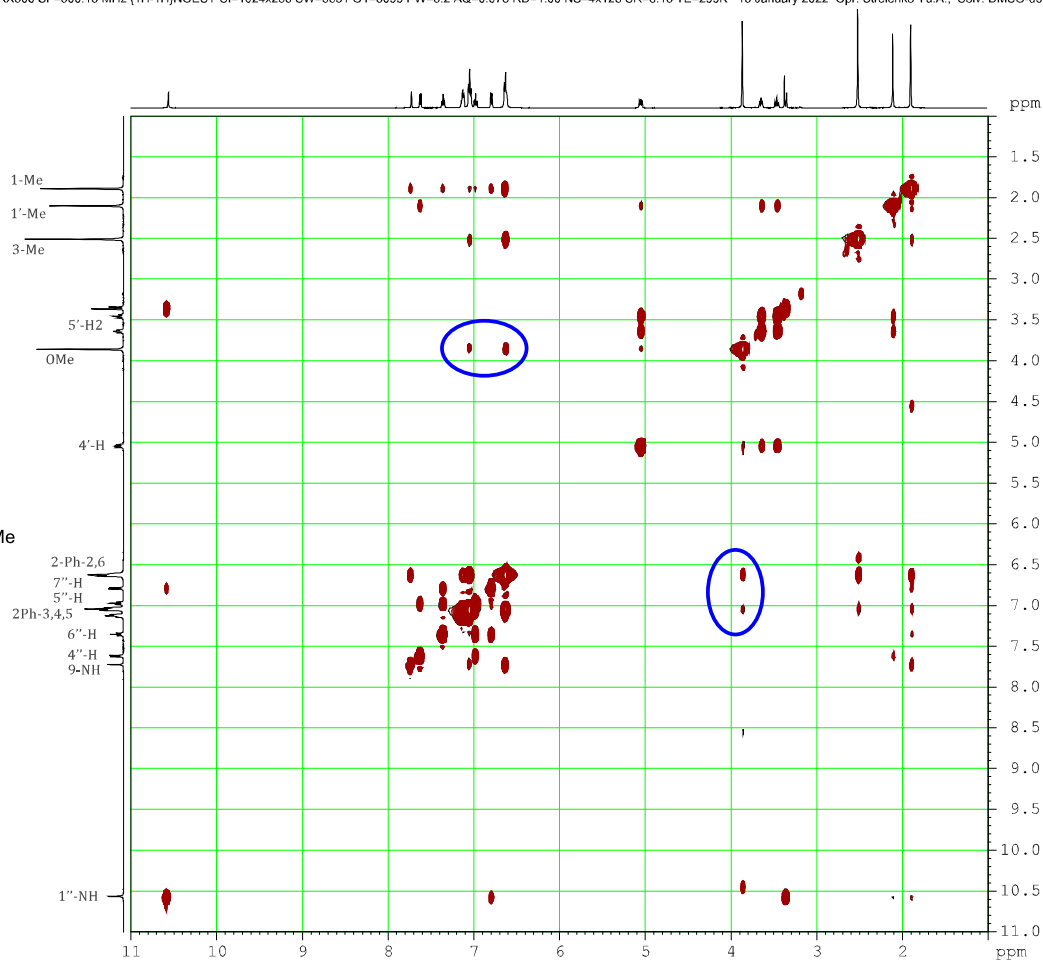

# /KANI IA1595.3 HMBP

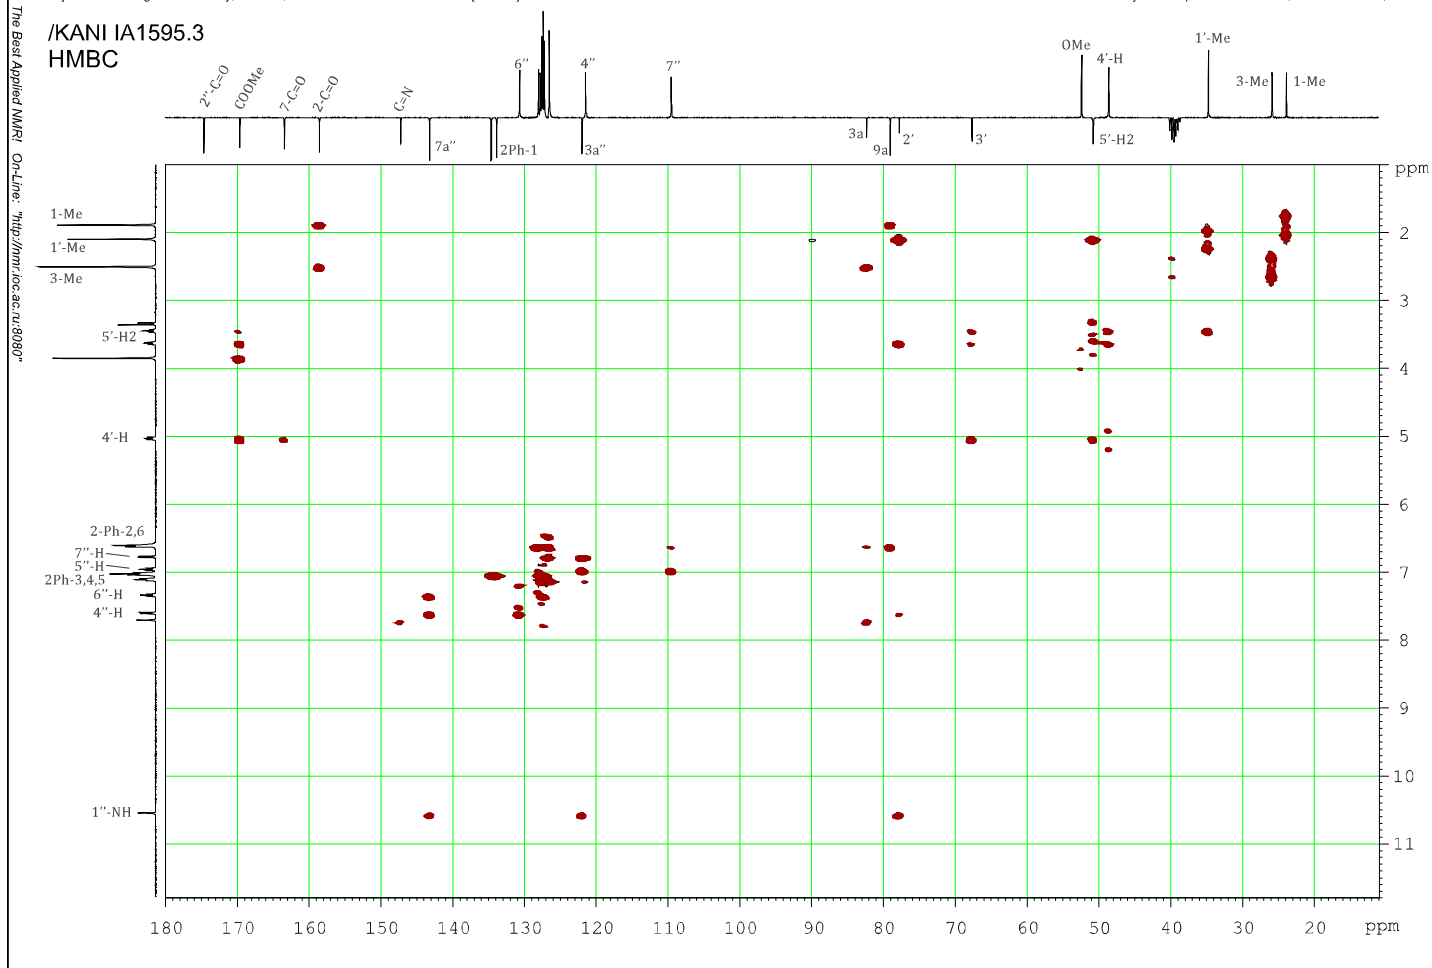

```
=====
Acq. Operator   :                               Seq. Line :    1
Acq. Instrument : Instrument 1                  Location  : IA-1670
Injection Date  : 10/3/2022 5:08:13 PM          Inj       :    1
                                           Inj Volume: 5 µl

Acq. Method     : D:\METHODS\CHROM 60 70.M
Last changed    : 10/3/2022 5:07:17 PM
Analysis Method : D:\METHODS\CHROM_ADC_PN.m
Last changed    : 10/4/2022 12:01:46 PM
Sample Info     : Column: Reprosil-Pur Basic C18 250*4.6 mm 5µm
                  A: H2O 0,01% tfa  B: MeCN 0,01% tfa
                  5-100 %B at 20min
=====
```

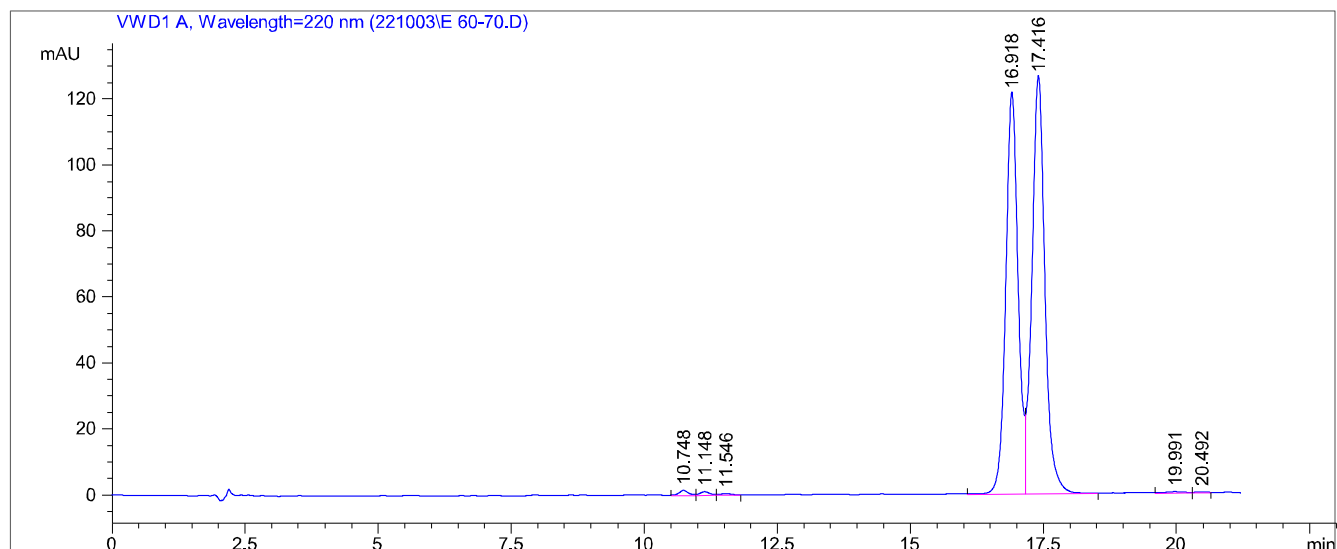

=====  
Area Percent Report  
=====

```
Sorted By      :      Signal
Multiplier     :      1.0000
Dilution       :      1.0000
Use Multiplier & Dilution Factor with ISTDs
```

Signal 1: VWD1 A, Wavelength=220 nm

| Peak # | RetTime [min] | Type | Width [min] | Area mAU *s | Height [mAU] | Area %  |
|--------|---------------|------|-------------|-------------|--------------|---------|
| 1      | 10.748        | MF   | 0.1911      | 16.90440    | 1.47459      | 0.3978  |
| 2      | 11.148        | MF   | 0.2049      | 13.03335    | 1.06039      | 0.3067  |
| 3      | 11.546        | FM   | 0.2292      | 6.50609     | 4.73162e-1   | 0.1531  |
| 4      | 16.918        | MF   | 0.2655      | 1991.02295  | 124.98219    | 46.8574 |
| 5      | 17.416        | FM   | 0.2833      | 2210.45190  | 130.05444    | 52.0215 |
| 6      | 19.991        | MM   | 0.3865      | 8.29231     | 3.57625e-1   | 0.1952  |
| 7      | 20.492        | MM   | 0.2156      | 2.90310     | 2.24429e-1   | 0.0683  |

Totals :                      4249.11410   258.62682

=====  
\*\*\* End of Report \*\*\*

**Analysis Name:** IA-1670  
**Method:** CHROM\_ADC\_PN.M  
**Sample Name:** Default  
**Analysis Info:** Column: ReprosilPur Basic C18 250\*4.6 mm 5um  
A: H2O 0,01% tfa B: MeCN 0,01% tfa  
5-100 %B at 20min  
**Instrument:** LC-MSD-Trap-SL  
**Operator:** LCMS

**Print Date:** 9/30/2022 11:49:09 AM  
**Acq. Date:** 9/29/2022 5:35:20 PM

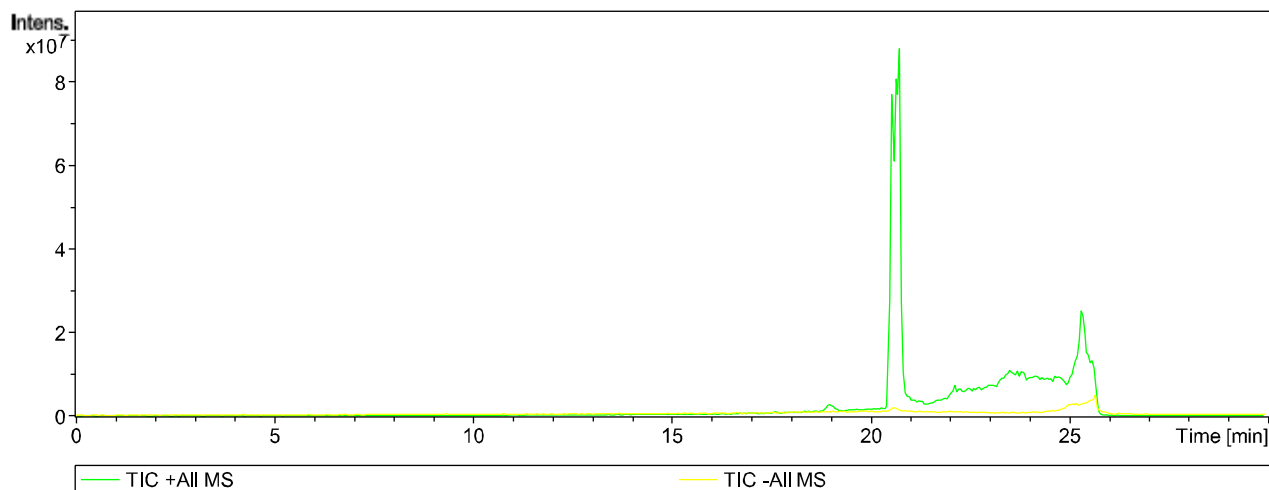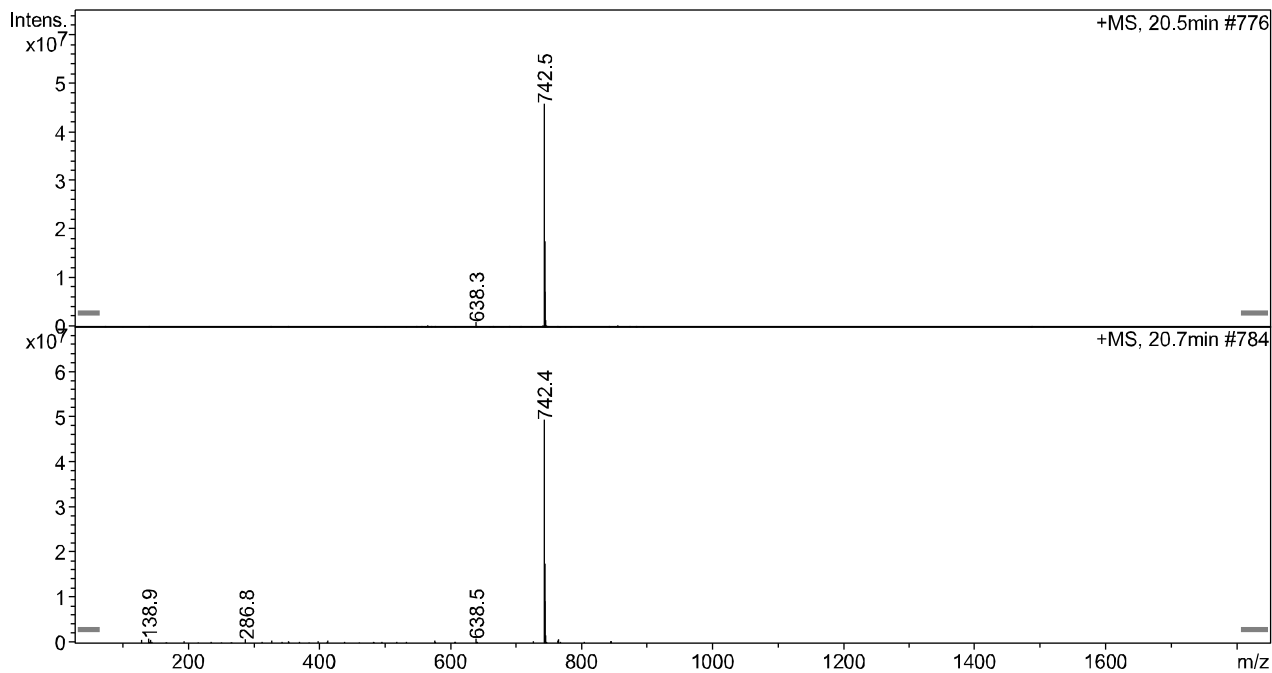

Supplement: s1 [file s1]
